# Supplementary material for: Extending beyond individual caves: a graph theory approach broadening conservation priorities in Amazon iron ore caves
Source: PeerJ journal article supplement (doi:10.7717/peerj.16877), 2024-01-31
Supplement: Dataset_S1.zip [file DATA_TAXA.xlsx]

## Sheet: DATASET_A1
Seasonality	Order	Species/Morphospecies	Deposit institution	Voucher	Troglobite?	ST_0001			ST_0002			ST_0003			ST_0004			ST_0005			ST_0006			ST_0007			ST_0008			ST_0009			ST_0010			ST_0011			ST_0012			ST_0013			ST_0014			ST_0015
						D	W	T	D	W	T	D	W	T	D	W	T	D	W	T	D	W	T	D	W	T	D	W	T	D	W	T	D	W	T	D	W	T	D	W	T	D	W	T	D	W	T	D	W
D	Tricladida	Geoplanide indet.	ISLA-UFLA	ISLA 43585	No	0	0	0	0	0	0	0	0	0	0	0	0	0	0	0	0	0	0	0	0	0	0	0	0	0	0	0	0	0	0	0	0	0	0	0	0	1	0	1	0	0	0	0	0
D	Mermithida	Mermithidae indet.	ISLA-UFLA	ISLA 43586	No	0	0	0	0	0	0	0	0	0	0	0	0	0	0	0	0	0	0	0	0	0	0	0	0	0	0	0	0	0	0	0	0	0	0	0	0	0	0	0	0	0	0	0	0
D/W	Gordioidea	Gordioidea indet.	ISLA-UFLA	ISLA 43587	No	0	0	0	0	0	0	1	1	2	0	0	0	0	0	0	0	0	0	0	0	0	0	0	0	0	0	0	0	0	0	1	0	1	0	0	0	0	0	0	0	0	0	0	0
D/W	Haplotaxida	Naididae sp.2	ISLA-UFLA	ISLA 43588	No	0	4	4	0	0	0	0	0	0	0	0	0	0	0	0	0	0	0	0	0	0	0	0	0	0	0	0	0	0	0	0	0	0	0	0	0	0	0	0	0	0	0	0	0
D/W	Haplotaxida	Enchytraeidae sp.1	ISLA-UFLA	ISLA 43589	No	0	1	1	0	0	0	0	0	0	0	0	0	0	0	0	0	0	0	0	0	0	0	0	0	0	0	0	0	0	0	0	2	2	0	0	0	0	0	0	0	0	0	0	0
W	Haplotaxida	Haplotaxida sp.1	ISLA-UFLA	ISLA 43590	No	0	0	0	0	0	0	0	0	0	0	0	0	0	0	0	0	0	0	0	0	0	0	0	0	0	0	0	0	0	0	0	0	0	0	0	0	0	0	0	0	0	0	0	0
W	Euonychophora	Epiperipatus sp.1	ISLA-UFLA	ISLA 43591	No	0	0	0	0	0	0	0	0	0	0	0	0	0	0	0	0	0	0	0	0	0	0	0	0	0	0	0	0	0	0	0	0	0	0	0	0	0	0	0	0	0	0	0	0
D/W	Opiliones	Opiliones immature	-	-	No	0	3	3	1	0	1	0	5	5	0	0	0	0	2	2	0	0	0	0	0	0	0	0	0	0	0	0	0	1	1	0	0	0	0	1	1	0	0	0	0	0	0	0	0
W	Opiliones	Cosmetidae immature	-	-	No	0	1	1	0	0	0	0	0	0	0	0	0	0	0	0	0	0	0	0	0	0	0	0	0	0	0	0	0	0	0	0	0	0	0	0	0	0	0	0	0	1	1	0	0
D	Opiliones	Flirtea valida	ISLA-UFLA	ISLA 43592	No	0	0	0	0	0	0	0	0	0	0	0	0	0	0	0	0	0	0	0	0	0	0	0	0	0	0	0	0	0	0	0	0	0	0	0	0	0	0	0	0	0	0	0	0
D/W	Opiliones	Roquettea sp.1	ISLA-UFLA	ISLA 43593	No	0	0	0	0	0	0	0	0	0	1	0	1	0	0	0	0	0	0	0	0	0	0	0	0	0	0	0	0	1	1	1	0	1	0	0	0	0	0	0	0	0	0	0	0
D	Opiliones	Roquettea sp.2	ISLA-UFLA	ISLA 43594	No	0	0	0	0	0	0	0	0	0	0	0	0	0	0	0	0	0	0	0	0	0	0	0	0	0	0	0	0	0	0	0	0	0	0	0	0	0	0	0	0	0	0	0	0
D	Opiliones	Escadabiidae immature	-	-	No	0	0	0	0	0	0	0	0	0	0	0	0	0	0	0	0	0	0	0	0	0	0	0	0	0	0	0	0	0	0	0	0	0	0	0	0	0	0	0	0	0	0	0	0
D/W	Opiliones	Escadabiidae sp.1	ISLA-UFLA	ISLA 43595	No	0	0	0	0	0	0	93	68	161	2	0	2	0	0	0	0	0	0	0	0	0	0	0	0	2	2	4	0	0	0	0	0	0	0	0	0	0	0	0	1	0	1	0	0
D	Opiliones	Gonyleptidae sp.1	ISLA-UFLA	ISLA 43596	No	0	0	0	0	0	0	0	0	0	0	0	0	0	0	0	0	0	0	0	0	0	0	0	0	0	0	0	0	0	0	0	0	0	0	0	0	0	0	0	1	0	1	0	0
W	Opiliones	Gerdesius sp.1	ISLA-UFLA	ISLA 43597	No	0	0	0	0	0	0	0	0	0	0	0	0	0	0	0	0	0	0	0	0	0	0	0	0	0	0	0	0	0	0	0	0	0	0	0	0	0	0	0	0	0	0	0	0
D	Opiliones	Saramacia annulata	ISLA-UFLA	ISLA 43598	No	0	0	0	0	0	0	0	0	0	1	0	1	0	0	0	0	0	0	0	0	0	0	0	0	0	0	0	0	0	0	0	0	0	0	0	0	3	0	3	0	0	0	0	0
D/W	Opiliones	Canga renatae	ISLA-UFLA	ISLA 43599	No	0	8	8	0	0	0	0	0	0	0	0	0	0	0	0	0	0	0	0	0	0	0	0	0	0	1	1	0	0	0	0	1	1	0	0	0	0	0	0	0	0	0	0	0
W	Opiliones	Gagrellinae immature	-	-	No	0	0	0	0	0	0	0	0	0	0	0	0	0	0	0	0	0	0	0	0	0	0	0	0	0	0	0	0	0	0	0	0	0	0	0	0	0	0	0	0	0	0	0	0
D/W	Opiliones	Gagrellinae sp.1	ISLA-UFLA	ISLA 43600	No	7	2	9	0	0	0	0	0	0	0	0	0	0	0	0	0	0	0	0	1	1	0	0	0	0	2	2	0	0	0	29	2	31	0	0	0	0	0	0	0	0	0	0	0
D/W	Opiliones	Pickeliana sp.1	ISLA-UFLA	ISLA 43601	No	0	2	2	0	0	0	0	1	1	0	0	0	0	0	0	0	0	0	0	0	0	0	0	0	0	0	0	0	0	0	0	0	0	0	0	0	0	0	0	0	0	0	0	0
D/W	Opiliones	Protimesius aff. gracilis	ISLA-UFLA	ISLA 43602	No	1	1	2	0	0	0	0	0	0	1	1	2	2	0	2	0	0	0	0	0	0	0	1	1	0	1	1	0	0	0	0	4	4	0	0	0	0	0	0	0	0	0	0	0
D	Opiliones	Protimesius laevis	ISLA-UFLA	ISLA 43603	No	0	0	0	0	0	0	0	0	0	0	0	0	0	0	0	0	0	0	0	0	0	0	0	0	0	0	0	0	0	0	0	0	0	0	0	0	0	0	0	0	0	0	0	0
D	Opiliones	Stygnidae immature	-	-	No	7	0	7	0	0	0	4	0	4	0	0	0	0	0	0	0	0	0	0	0	0	0	0	0	0	0	0	0	0	0	0	0	0	0	0	0	0	0	0	0	0	0	0	0
W	Opiliones	Zalmoxidae sp.1	ISLA-UFLA	ISLA 43604	No	0	0	0	0	0	0	0	0	0	0	0	0	0	0	0	0	0	0	0	0	0	0	0	0	0	0	0	0	0	0	0	0	0	0	1	1	0	0	0	0	0	0	0	0
D/W	Scorpiones	Ananteris luciae	ISLA-UFLA	ISLA 43605	No	2	4	6	0	0	0	0	0	0	0	0	0	1	0	1	0	0	0	0	0	0	0	0	0	0	0	0	0	0	0	0	0	0	2	0	2	0	0	0	0	0	0	0	0
W	Scorpiones	Tityus bastosi	ISLA-UFLA	ISLA 43606	No	0	0	0	0	0	0	0	0	0	0	0	0	0	0	0	0	0	0	0	0	0	0	0	0	0	0	0	0	0	0	0	0	0	0	0	0	0	0	0	0	0	0	0	0
W	Pseudoscorpiones	Chernetidae immature	-	-	No	0	0	0	0	0	0	0	0	0	0	0	0	0	0	0	0	0	0	0	0	0	0	0	0	0	0	0	0	0	0	0	0	0	0	0	0	0	0	0	0	0	0	0	0
D	Pseudoscorpiones	Chernetidae sp.1	ISLA-UFLA	ISLA 43607	No	0	0	0	0	0	0	0	0	0	0	0	0	0	0	0	0	0	0	0	0	0	0	0	0	0	0	0	0	0	0	9	0	9	0	0	0	0	0	0	0	0	0	0	0
D/W	Pseudoscorpiones	Chernetidae sp.4	ISLA-UFLA	ISLA 43608	No	10	9	19	0	5	5	34	28	62	7	6	13	3	5	8	0	0	0	1	0	1	1	3	4	2	7	9	1	3	4	4	12	16	3	2	5	4	9	13	0	0	0	2	0
D/W	Pseudoscorpiones	Chthoniidae immature	-	-	No	2	6	8	0	0	0	0	1	1	0	3	3	0	0	0	0	0	0	0	0	0	0	0	0	0	0	0	0	0	0	0	0	0	4	0	4	0	1	1	0	0	0	0	0
D/W	Pseudoscorpiones	Pseudochthonius sp.1	ISLA-UFLA	ISLA 43609	No	0	0	0	0	0	0	0	0	0	0	0	0	0	0	0	0	0	0	0	0	0	0	1	1	0	0	0	0	1	1	0	0	0	0	3	3	0	0	0	0	0	0	0	0
D/W	Pseudoscorpiones	Pseudochthonius sp.2	ISLA-UFLA	ISLA 43610	No	6	7	13	4	0	4	16	14	30	6	0	6	5	2	7	0	0	0	0	0	0	2	0	2	4	0	4	2	0	2	13	14	27	0	3	3	3	1	4	2	1	3	0	0
D	Pseudoscorpiones	Pseudochthonius sp.5	ISLA-UFLA	ISLA 43611	No	0	0	0	0	0	0	0	0	0	0	0	0	0	0	0	0	0	0	0	0	0	0	0	0	0	0	0	0	0	0	0	0	0	0	0	0	0	0	0	0	0	0	0	0
D/W	Pseudoscorpiones	Apolpium sp.1	ISLA-UFLA	ISLA 43612	No	0	0	0	0	0	0	0	0	0	0	0	0	0	0	0	0	0	0	0	0	0	0	0	0	0	0	0	0	0	0	0	0	0	0	0	0	0	0	0	0	0	0	0	0
D/W	Pseudoscorpiones	Olpiidae sp.1	ISLA-UFLA	ISLA 43613	No	0	0	0	0	0	0	0	0	0	0	0	0	0	0	0	0	0	0	0	0	0	0	0	0	0	0	0	0	0	0	0	0	0	0	0	0	0	0	0	1	0	1	0	0
D	Pseudoscorpiones	Nannobisium sp.1	ISLA-UFLA	ISLA 43614	No	0	0	0	0	0	0	0	0	0	0	0	0	0	0	0	0	0	0	0	0	0	0	0	0	0	0	0	0	0	0	0	0	0	0	0	0	0	0	0	0	0	0	0	0
D/W	Palpigradi	Allokoenenia sp.1	ISLA-UFLA	ISLA 43615	No	12	0	12	0	0	0	0	0	0	0	0	0	0	0	0	0	0	0	0	0	0	0	0	0	0	0	0	0	0	0	0	0	0	0	0	0	0	0	0	0	0	0	0	0
D/W	Palpigradi	Allokoenenia sp.2	ISLA-UFLA	ISLA 43616	No	0	0	0	0	0	0	0	0	0	0	0	0	0	0	0	0	0	0	0	0	0	0	0	0	0	0	0	0	0	0	0	0	0	0	0	0	0	0	0	0	0	0	0	0
D/W	Palpigradi	Eukoenenia sp.1	ISLA-UFLA	ISLA 43617	No	0	0	0	0	0	0	2	0	2	0	0	0	0	0	0	0	0	0	0	0	0	0	0	0	0	0	0	0	0	0	0	0	0	0	0	0	0	0	0	0	0	0	0	0
W	Palpigradi	Eukoenenia sp.2	ISLA-UFLA	ISLA 43618	No	0	0	0	0	0	0	0	0	0	0	0	0	0	0	0	0	0	0	0	0	0	0	0	0	0	0	0	0	0	0	0	7	7	0	0	0	0	1	1	0	0	0	0	0
W	Palpigradi	Leptokoenenia sp.2	ISLA-UFLA	ISLA 43619	No	0	0	0	0	0	0	0	0	0	0	0	0	0	0	0	0	0	0	0	0	0	0	0	0	0	0	0	0	0	0	0	0	0	0	0	0	0	0	0	0	0	0	0	0
D/W	Ricinulei	Cryptocellus canga	ISLA-UFLA	ISLA 43620	No	0	1	1	0	0	0	0	1	1	0	0	0	1	1	2	0	0	0	0	0	0	0	0	0	1	0	1	0	0	0	0	7	7	0	0	0	0	0	0	0	1	1	0	0
W	Opilioacariformes	Caribeacarus brasiliensis	ISLA-UFLA	ISLA 43621	No	0	0	0	0	0	0	0	0	0	0	0	0	0	1	1	0	0	0	0	1	1	0	1	1	0	0	0	0	0	0	0	0	0	0	1	1	0	0	0	0	0	0	0	0
D/W	Holothyrida	Diplothyrus schubarti	ISLA-UFLA	ISLA 43622	No	0	0	0	0	0	0	1	0	1	0	0	0	0	1	1	0	0	0	0	0	0	0	0	0	0	0	0	0	0	0	0	0	0	0	0	0	0	0	0	0	0	0	0	0
D/W	Ixodida	Argas (Ornithodoros) sp.1	ISLA-UFLA	ISLA 43623	No	0	0	0	0	0	0	0	0	0	0	0	0	0	0	0	0	0	0	0	0	0	0	0	0	0	0	0	6	0	6	0	0	0	0	0	0	0	0	0	0	0	0	0	0
D/W	Ixodida	Argas (Ornithodoros) sp.2	ISLA-UFLA	ISLA 43624	No	0	0	0	0	0	0	0	0	0	0	0	0	0	0	0	0	0	0	0	0	0	0	0	0	0	0	0	0	2	2	0	0	0	0	0	0	0	0	0	0	0	0	0	0
W	Ixodida	Argas (Ornithodoros) sp.3	ISLA-UFLA	ISLA 43625	No	0	0	0	0	0	0	0	0	0	0	0	0	0	0	0	0	0	0	0	0	0	0	0	0	0	0	0	0	0	0	0	0	0	0	0	0	0	0	0	0	0	0	0	0
D/W	Ixodida	Amblyomma cajennense	ISLA-UFLA	ISLA 43626	No	0	0	0	0	0	0	1	0	1	0	0	0	0	0	0	0	0	0	0	0	0	0	0	0	0	0	0	0	0	0	0	0	0	0	0	0	0	1	1	0	0	0	0	1
D	Ixodida	Amblyomma goeldii	ISLA-UFLA	ISLA 43627	No	0	0	0	0	0	0	0	0	0	0	0	0	0	0	0	0	0	0	0	0	0	0	0	0	0	0	0	0	0	0	0	0	0	1	0	1	0	0	0	0	0	0	0	0
W	Ixodida	Amblyomma sp.1	ISLA-UFLA	ISLA 43628	No	0	0	0	0	0	0	0	0	0	0	0	0	0	0	0	0	0	0	0	0	0	0	0	0	0	0	0	0	1	1	0	0	0	0	0	0	0	0	0	0	0	0	0	0
D/W	Ixodida	Amblyomma sp.3	ISLA-UFLA	ISLA 43629	No	0	0	0	0	0	0	0	0	0	0	0	0	0	0	0	0	0	0	0	0	0	0	0	0	0	0	0	0	0	0	0	0	0	0	0	0	0	0	0	0	0	0	0	0
W	Ixodida	Amblyomma sp.4	ISLA-UFLA	ISLA 43630	No	0	0	0	0	0	0	0	2	2	0	0	0	0	0	0	0	0	0	0	0	0	0	0	0	0	0	0	0	0	0	0	0	0	0	0	0	0	0	0	0	0	0	0	0
W	Ixodida	Amblyomma sp.5	ISLA-UFLA	ISLA 43631	No	0	0	0	0	0	0	0	0	0	0	0	0	0	0	0	0	0	0	0	0	0	0	0	0	0	0	0	0	0	0	0	0	0	0	0	0	0	0	0	0	0	0	0	0
W	Ixodida	Amblyomma sp.6	ISLA-UFLA	ISLA 43632	No	0	0	0	0	0	0	0	1	1	0	0	0	0	0	0	0	0	0	0	0	0	0	0	0	0	0	0	0	0	0	0	0	0	0	0	0	0	0	0	0	0	0	0	0
D/W	Mesostigmata	Trygynaspida sp.1	ISLA-UFLA	ISLA 43633	No	0	0	0	0	0	0	0	0	0	0	0	0	0	0	0	0	0	0	0	0	0	0	0	0	0	0	0	0	0	0	0	0	0	0	0	0	0	0	0	0	0	0	0	0
D	Mesostigmata	Uropodina sp.1 (immature)	ISLA-UFLA	ISLA 43634	No	0	0	0	0	0	0	0	0	0	0	0	0	0	0	0	0	0	0	0	0	0	0	0	0	0	0	0	0	0	0	0	0	0	0	0	0	0	0	0	0	0	0	0	0
D	Mesostigmata	Ascidae sp.1	ISLA-UFLA	ISLA 43635	No	0	0	0	0	0	0	0	0	0	0	0	0	0	0	0	0	0	0	0	0	0	0	0	0	0	0	0	0	0	0	0	0	0	0	0	0	0	0	0	0	0	0	0	0
D	Mesostigmata	Ascoidea sp.1	ISLA-UFLA	ISLA 43636	No	0	0	0	0	0	0	0	0	0	0	0	0	0	0	0	0	0	0	0	0	0	0	0	0	0	0	0	0	0	0	0	0	0	0	0	0	0	0	0	0	0	0	0	0
W	Mesostigmata	Deraiophorus sp.1	ISLA-UFLA	ISLA 43637	No	0	0	0	0	0	0	0	0	0	0	0	0	0	0	0	0	0	0	0	0	0	0	0	0	0	0	0	0	0	0	0	0	0	0	0	0	0	0	0	0	0	0	0	0
D	Mesostigmata	Heterozerconidae sp.3	ISLA-UFLA	ISLA 43704	No	0	0	0	0	0	0	0	0	0	0	0	0	0	0	0	0	0	0	0	0	0	0	0	0	0	0	0	0	0	0	0	0	0	0	0	0	0	0	0	0	0	0	0	0
D/W	Mesostigmata	Androlaelaps sp.1	ISLA-UFLA	ISLA 43638	No	0	0	0	0	1	1	0	0	0	0	0	0	0	0	0	0	0	0	0	0	0	0	0	0	0	0	0	0	0	0	0	0	0	0	0	0	0	0	0	0	0	0	0	0
D/W	Mesostigmata	Gaeolaelaps sp.1	ISLA-UFLA	ISLA 43639	No	0	0	0	0	0	0	0	0	0	0	0	0	0	0	0	0	0	0	0	0	0	0	0	0	0	0	0	0	0	0	0	0	0	0	0	0	0	0	0	0	0	0	0	0
D	Mesostigmata	Gaeolaelaps sp.2	ISLA-UFLA	ISLA 43640	No	0	0	0	0	0	0	0	0	0	0	0	0	0	0	0	0	0	0	0	0	0	0	0	0	0	0	0	0	0	0	0	0	0	0	0	0	0	0	0	0	0	0	0	0
W	Mesostigmata	Laelapidae sp.1	ISLA-UFLA	ISLA 43641	Yes	0	0	0	0	0	0	0	0	0	0	0	0	0	0	0	0	0	0	0	0	0	0	0	0	0	0	0	0	0	0	0	0	0	0	0	0	0	0	0	0	0	0	0	0
D	Mesostigmata	Laelapidae sp.2	ISLA-UFLA	ISLA 43642	No	0	0	0	0	0	0	0	0	0	0	0	0	0	0	0	0	0	0	0	0	0	0	0	0	0	0	0	0	0	0	0	0	0	0	0	0	0	0	0	0	0	0	0	0
D	Mesostigmata	Laelapidae sp.3	ISLA-UFLA	ISLA 43643	No	0	0	0	0	0	0	0	0	0	0	0	0	0	0	0	0	0	0	0	0	0	0	0	0	0	0	0	0	0	0	0	0	0	0	0	0	0	0	0	0	0	0	0	0
W	Mesostigmata	Laelapidae sp.6	ISLA-UFLA	ISLA 43644	No	0	0	0	0	0	0	0	0	0	0	0	0	0	0	0	0	0	0	0	0	0	0	0	0	0	0	0	0	0	0	0	0	0	0	0	0	0	0	0	0	0	0	0	0
W	Mesostigmata	Laelapidae sp.7	ISLA-UFLA	ISLA 43645	No	0	0	0	0	0	0	0	0	0	0	0	0	0	0	0	0	0	0	0	0	0	0	0	0	0	0	0	0	0	0	0	20	20	0	0	0	0	0	0	0	0	0	0	0
D/W	Mesostigmata	Stratiolaelaps sp.1	ISLA-UFLA	ISLA 43646	No	0	0	0	0	0	0	0	0	0	0	0	0	0	0	0	0	0	0	0	0	0	0	0	0	0	0	0	0	0	0	0	480	480	0	0	0	0	0	0	0	0	0	0	0
D/W	Mesostigmata	Macronyssidae sp.1	ISLA-UFLA	ISLA 43647	No	0	0	0	0	0	0	0	4	4	0	0	0	1	0	1	0	0	0	0	0	0	0	0	0	0	0	0	0	0	0	0	5	5	0	0	0	0	0	0	0	0	0	0	0
D	Mesostigmata	Melicharidae sp.1	ISLA-UFLA	ISLA 43648	No	0	0	0	0	0	0	0	0	0	0	0	0	0	0	0	0	0	0	0	0	0	0	0	0	1	0	1	0	0	0	0	0	0	0	0	0	0	0	0	0	0	0	0	0
D	Mesostigmata	Oplitidae sp.1	ISLA-UFLA	ISLA 43649	No	0	0	0	0	0	0	0	0	0	0	0	0	0	0	0	0	0	0	0	0	0	0	0	0	0	0	0	0	0	0	0	0	0	0	0	0	0	0	0	0	0	0	0	0
W	Mesostigmata	Oplitidae sp.2	ISLA-UFLA	ISLA 43650	No	0	0	0	0	0	0	0	1	1	0	0	0	0	0	0	0	0	0	0	0	0	0	0	0	0	0	0	0	0	0	0	0	0	0	0	0	0	0	0	0	0	0	0	0
W	Mesostigmata	Otopheidomenis sp.1	ISLA-UFLA	ISLA 43651	No	0	0	0	0	0	0	0	0	0	0	0	0	0	0	0	0	0	0	0	0	0	0	0	0	0	0	0	0	0	0	0	0	0	0	0	0	0	0	0	0	14	14	0	0
D	Mesostigmata	Pachylaelapidae sp.1	ISLA-UFLA	ISLA 43652	No	0	0	0	0	0	0	0	0	0	0	0	0	0	0	0	0	0	0	0	0	0	0	0	0	0	0	0	0	0	0	0	0	0	0	0	0	0	0	0	0	0	0	0	0
D/W	Mesostigmata	Podocinum sp.1	ISLA-UFLA	ISLA 43653	No	0	0	0	0	0	0	0	0	0	0	0	0	0	0	0	0	0	0	0	0	0	0	0	0	0	0	0	0	0	0	0	0	0	0	0	0	0	0	0	0	0	0	0	0
D/W	Mesostigmata	Reginacharlottia sp.1	ISLA-UFLA	ISLA 43654	No	0	0	0	0	0	0	0	0	0	0	0	0	0	0	0	0	0	0	0	0	0	0	0	0	0	0	0	0	0	0	0	0	0	0	0	0	0	0	0	0	0	0	0	0
D/W	Mesostigmata	Trachyuropoda sp.1	ISLA-UFLA	ISLA 43655	No	0	0	0	0	0	0	0	0	0	0	0	0	0	0	0	0	0	0	0	0	0	0	0	0	0	0	0	0	0	0	0	0	0	0	0	0	0	0	0	0	0	0	0	0
W	Mesostigmata	Uropodidae sp.1	ISLA-UFLA	ISLA 43656	No	0	0	0	0	0	0	0	0	0	0	0	0	0	0	0	0	0	0	0	0	0	0	0	0	0	0	0	0	0	0	0	0	0	0	0	0	0	0	0	0	0	0	0	0
D	Mesostigmata	Uropodina sp.4	ISLA-UFLA	ISLA 43657	No	0	0	0	0	0	0	0	0	0	0	0	0	0	0	0	0	0	0	0	0	0	0	0	0	0	0	0	0	0	0	0	0	0	0	0	0	0	0	0	0	0	0	0	0
W	Trombidiformes	Parasitengona larva sp.6	ISLA-UFLA	ISLA 43658	No	0	0	0	0	0	0	0	0	0	0	0	0	0	0	0	0	0	0	0	0	0	0	0	0	0	0	0	0	0	0	0	0	0	0	0	0	0	0	0	0	0	0	0	0
W	Trombidiformes	Parasitengona larva sp.5	ISLA-UFLA	ISLA 43659	No	0	0	0	0	0	0	0	0	0	0	0	0	0	0	0	0	0	0	0	0	0	0	0	0	0	0	0	0	0	0	0	0	0	0	0	0	0	0	0	0	0	0	0	0
D/W	Trombidiformes	Parasitengona sp.10	ISLA-UFLA	ISLA 43660	No	0	0	0	0	0	0	0	0	0	0	0	0	0	0	0	0	0	0	0	0	0	0	0	0	0	0	0	0	0	0	0	0	0	0	0	0	0	0	0	0	0	0	0	0
W	Trombidiformes	Parasitengona sp.11	ISLA-UFLA	ISLA 43661	No	0	0	0	0	0	0	0	0	0	0	0	0	0	0	0	0	0	0	0	0	0	0	0	0	0	0	0	0	0	0	0	0	0	0	0	0	0	0	0	0	0	0	0	0
D	Trombidiformes	Parasitengona sp.12	ISLA-UFLA	ISLA 43662	No	0	0	0	0	0	0	0	0	0	0	0	0	0	0	0	0	0	0	0	0	0	0	0	0	0	0	0	0	0	0	0	0	0	0	0	0	0	0	0	0	0	0	0	0
D	Trombidiformes	Parasitengona sp.5	ISLA-UFLA	ISLA 43663	No	0	0	0	0	0	0	0	0	0	0	0	0	0	0	0	0	0	0	0	0	0	0	0	0	0	0	0	0	0	0	0	0	0	0	0	0	0	0	0	0	0	0	0	0
D/W	Trombidiformes	Trombiculidae sp.1	ISLA-UFLA	ISLA 43664	No	0	0	0	1	0	1	0	0	0	0	0	0	0	0	0	0	0	0	0	0	0	0	0	0	0	0	0	0	0	0	0	0	0	0	0	0	0	0	0	0	0	0	1	0
D/W	Trombidiformes	Trombiculidae sp.2	ISLA-UFLA	ISLA 43665	No	0	0	0	0	1	1	0	0	0	0	0	0	0	0	0	0	0	0	0	0	0	0	0	0	0	0	0	0	2	2	0	0	0	0	0	0	0	2	2	0	0	0	0	0
D/W	Trombidiformes	Trombiculidae sp.6	ISLA-UFLA	ISLA 43666	No	0	2	2	0	0	0	0	0	0	0	0	0	0	1	1	0	0	0	0	0	0	0	0	0	0	0	0	0	0	0	6	9	15	0	0	0	0	0	0	0	0	0	0	0
D	Trombidiformes	Trombiculidae sp.7	ISLA-UFLA	ISLA 43667	No	0	0	0	0	0	0	0	0	0	0	0	0	0	0	0	0	0	0	0	0	0	0	0	0	0	0	0	0	0	0	0	0	0	0	0	0	0	0	0	0	0	0	0	0
D/W	Trombidiformes	Trombiculidae sp.8	ISLA-UFLA	ISLA 43668	No	0	0	0	0	0	0	0	0	0	0	0	0	0	0	0	0	0	0	0	0	0	0	0	0	0	0	0	0	0	0	0	0	0	0	0	0	0	0	0	0	0	0	0	0
D/W	Trombidiformes	Trombiculidae sp.9	ISLA-UFLA	ISLA 43669	No	0	0	0	0	0	0	0	0	0	0	0	0	0	0	0	0	0	0	0	0	0	0	0	0	0	0	0	0	0	0	0	0	0	0	0	0	0	0	0	0	0	0	0	0
D/W	Trombidiformes	Erythracarus cf. nasutus	ISLA-UFLA	ISLA 43670	No	0	0	0	0	0	0	0	0	0	0	0	0	0	0	0	0	0	0	0	0	0	0	0	0	0	0	0	0	0	0	0	0	0	0	2	2	0	0	0	0	0	0	0	0
W	Trombidiformes	Odontoscirus sp.1	ISLA-UFLA	ISLA 43671	No	0	0	0	0	0	0	0	0	0	0	0	0	0	0	0	0	0	0	0	0	0	0	0	0	0	0	0	0	0	0	0	0	0	0	0	0	0	0	0	0	0	0	0	0
D	Trombidiformes	Cunaxidae sp.1	ISLA-UFLA	ISLA 43672	No	0	0	0	0	0	0	0	0	0	0	0	0	0	0	0	0	0	0	0	0	0	0	0	0	0	0	0	0	0	0	0	0	0	0	0	0	0	0	0	0	0	0	0	0
W	Trombidiformes	Cunaxidae sp.2	ISLA-UFLA	ISLA 43673	No	0	0	0	0	0	0	0	0	0	0	0	0	0	0	0	0	0	0	0	0	0	0	0	0	0	0	0	0	0	0	0	1	1	0	0	0	0	0	0	0	0	0	0	0
W	Trombidiformes	Cunaxidae sp.3	ISLA-UFLA	ISLA 43674	No	0	0	0	0	0	0	0	0	0	0	0	0	0	0	0	0	0	0	0	0	0	0	0	0	0	0	0	0	0	0	0	0	0	0	0	0	0	0	0	0	0	0	0	0
D	Trombidiformes	Callidosoma sp.1	ISLA-UFLA	ISLA 43675	No	0	0	0	0	0	0	0	0	0	0	0	0	0	0	0	0	0	0	0	0	0	0	0	0	0	0	0	0	0	0	0	0	0	0	0	0	1	0	1	0	0	0	0	0
D	Trombidiformes	Leptus sp.1	ISLA-UFLA	ISLA 43676	No	0	0	0	0	0	0	0	0	0	0	0	0	0	0	0	0	0	0	0	0	0	0	0	0	0	0	0	0	0	0	0	0	0	0	0	0	1	0	1	0	0	0	0	0
W	Trombidiformes	Linopodes sp.3	ISLA-UFLA	ISLA 43677	No	0	0	0	0	0	0	0	2	2	0	0	0	0	0	0	0	0	0	0	0	0	0	1	1	0	0	0	0	0	0	0	0	0	0	2	2	0	0	0	0	0	0	0	0
D/W	Trombidiformes	Whartonia cf. pachywhartoni	ISLA-UFLA	ISLA 43678	No	36	0	36	0	0	0	11	3	14	0	0	0	0	0	0	0	0	0	0	0	0	0	0	0	0	0	0	0	0	0	11	4	15	0	0	0	0	0	0	0	0	0	0	0
D	Trombidiformes	Metapronematus sp.1	ISLA-UFLA	ISLA 43679	No	0	0	0	0	0	0	0	0	0	0	0	0	0	0	0	0	0	0	0	0	0	0	0	0	0	0	0	0	0	0	0	0	0	0	0	0	1	0	1	0	0	0	0	0
D/W	Trombidiformes	Labdostomatidae sp.1	ISLA-UFLA	ISLA 43680	No	0	0	0	0	0	0	0	0	0	0	0	0	0	0	0	0	0	0	0	0	0	0	0	0	0	0	0	0	0	0	0	0	0	0	0	0	0	0	0	0	0	0	0	0
D	Trombidiformes	Labdostomatidae sp.1	ISLA-UFLA	ISLA 43681	No	1	0	1	0	0	0	0	0	0	0	0	0	0	0	0	0	0	0	0	0	0	0	0	0	0	0	0	0	0	0	0	0	0	0	0	0	0	0	0	0	0	0	0	0
D/W	Trombidiformes	Labdostomatidae sp.1	ISLA-UFLA	ISLA 43682	No	1	0	1	0	0	0	0	0	0	0	0	0	0	0	0	0	0	0	0	0	0	0	0	0	0	0	0	0	0	0	0	0	0	0	0	0	0	0	0	0	0	0	0	0
D/W	Trombidiformes	Leeuwenhoekiidae sp.4 (immature)	ISLA-UFLA	ISLA 43683	No	0	0	0	0	0	0	0	0	0	0	0	0	0	0	0	0	0	0	0	0	0	0	1	1	0	0	0	0	0	0	0	0	0	0	0	0	0	0	0	0	0	0	0	0
W	Trombidiformes	Neotrombidium sp.1	ISLA-UFLA	ISLA 43684	No	0	0	0	0	0	0	0	0	0	0	0	0	0	0	0	0	0	0	0	0	0	0	1	1	0	0	0	0	0	0	0	0	0	0	0	0	0	0	0	0	0	0	0	0
W	Trombidiformes	Penthaleidae sp.1	ISLA-UFLA	ISLA 43685	No	0	0	0	0	0	0	0	0	0	0	0	0	0	0	0	0	0	0	0	0	0	0	0	0	0	0	0	0	0	0	0	0	0	0	1	1	0	0	0	0	0	0	0	0
W	Trombidiformes	Robustocheles sp.2	ISLA-UFLA	ISLA 43686	No	0	0	0	0	0	0	0	0	0	0	0	0	0	2	2	0	0	0	0	0	0	0	0	0	0	0	0	0	0	0	0	0	0	0	0	0	0	0	0	0	0	0	0	0
D/W	Trombidiformes	Robustocheles sp.6	ISLA-UFLA	ISLA 43687	No	1	0	1	0	0	0	1	14	15	0	0	0	3	0	3	0	0	0	0	0	0	0	0	0	0	3	3	0	2	2	1	0	1	0	0	0	0	0	0	0	0	0	0	0
D	Trombidiformes	Robustocheles sp.1	ISLA-UFLA	ISLA 43688	No	0	0	0	0	0	0	0	0	0	0	0	0	0	0	0	0	0	0	0	0	0	0	0	0	0	0	0	0	0	0	1	0	1	0	0	0	0	0	0	0	0	0	0	0
D	Trombidiformes	Robustocheles sp.5	ISLA-UFLA	ISLA 43689	No	1	0	1	0	0	0	0	0	0	0	0	0	0	0	0	0	0	0	0	0	0	0	0	0	0	0	0	0	0	0	0	0	0	0	0	0	0	0	0	0	0	0	0	0
D	Trombidiformes	Stigmaeidae sp.1	ISLA-UFLA	ISLA 43690	No	0	0	0	0	0	0	0	0	0	0	0	0	0	0	0	0	0	0	0	0	0	0	0	0	0	0	0	0	0	0	0	0	0	0	0	0	0	0	0	0	0	0	0	0
W	Sarcoptiformes	Oribatida sp.11	ISLA-UFLA	ISLA 43691	No	0	0	0	0	1	1	0	0	0	0	0	0	0	0	0	0	0	0	0	0	0	0	0	0	0	0	0	0	0	0	0	0	0	0	0	0	0	0	0	0	0	0	0	0
D/W	Sarcoptiformes	Oribatida sp.10	ISLA-UFLA	ISLA 43692	No	0	0	0	0	0	0	0	0	0	0	0	0	0	0	0	0	0	0	0	0	0	0	1	1	0	0	0	0	0	0	0	0	0	0	0	0	0	0	0	0	0	0	0	0
D/W	Sarcoptiformes	Oribatida sp.2	ISLA-UFLA	ISLA 43693	No	0	0	0	0	0	0	0	0	0	0	0	0	0	0	0	0	0	0	0	0	0	0	0	0	0	0	0	0	0	0	0	0	0	0	0	0	0	0	0	0	0	0	0	0
W	Sarcoptiformes	Oribatida sp.7	ISLA-UFLA	ISLA 43694	No	0	0	0	0	0	0	0	100	100	0	0	0	0	0	0	0	0	0	0	0	0	0	0	0	0	0	0	0	0	0	0	74	74	0	0	0	0	0	0	0	0	0	0	0
W	Sarcoptiformes	Oribatida sp.8	ISLA-UFLA	ISLA 43695	No	0	0	0	0	0	0	0	0	0	0	0	0	0	0	0	0	0	0	0	0	0	0	0	0	0	0	0	0	0	0	0	0	0	0	0	0	0	0	0	0	0	0	0	0
D	Sarcoptiformes	Acaridae sp.1	ISLA-UFLA	ISLA 43696	No	0	0	0	0	0	0	1	0	1	0	0	0	1	0	1	0	0	0	0	0	0	0	0	0	0	0	0	0	0	0	0	0	0	0	0	0	0	0	0	0	0	0	0	0
D	Sarcoptiformes	Acaridae immature	-	-	No	0	0	0	0	0	0	0	0	0	0	0	0	0	0	0	0	0	0	0	0	0	0	0	0	0	0	0	0	0	0	0	0	0	0	0	0	0	0	0	0	0	0	0	0
D/W	Sarcoptiformes	Chetochelacaridae gen. n. sp.1	ISLA-UFLA	ISLA 43697	No	0	0	0	0	0	0	0	0	0	0	0	0	0	1	1	0	0	0	0	0	0	0	0	0	0	0	0	0	0	0	0	24	24	0	0	0	0	0	0	0	0	0	0	0
W	Sarcoptiformes	Galumnelidae sp.1	ISLA-UFLA	ISLA 43698	No	0	0	0	0	0	0	0	1	1	0	0	0	0	0	0	0	0	0	0	0	0	0	0	0	0	0	0	0	0	0	0	35	35	0	0	0	0	0	0	0	0	0	0	0
W	Sarcoptiformes	Lohmaniidae sp.1	ISLA-UFLA	ISLA 43699	No	0	0	0	0	0	0	0	0	0	0	0	0	0	0	0	0	0	0	0	0	0	0	0	0	0	0	0	0	0	0	0	0	0	0	0	0	0	0	0	0	0	0	0	0
D	Heterostigmata	Microdispidae sp.1	ISLA-UFLA	ISLA 43700	No	0	0	0	0	0	0	0	0	0	0	0	0	0	0	0	0	0	0	0	0	0	0	0	0	0	0	0	0	0	0	0	0	0	0	0	0	0	0	0	0	0	0	1	0
D	Heterostigmata	Neoygmephoridae sp.1	ISLA-UFLA	ISLA 43701	No	0	0	0	0	0	0	0	0	0	0	0	0	0	0	0	0	0	0	0	0	0	0	0	0	140	0	140	0	0	0	0	0	0	0	0	0	0	0	0	0	0	0	0	0
W	Heterostigmata	Pygmephoridae sp.2	ISLA-UFLA	ISLA 43702	No	0	0	0	0	0	0	0	0	0	0	0	0	0	0	0	0	0	0	0	0	0	0	0	0	0	0	0	0	0	0	0	0	0	0	0	0	0	1	1	0	0	0	0	0
D	Heterostigmata	Imparipes sp.1	ISLA-UFLA	ISLA 43703	No	0	0	0	0	0	0	0	0	0	0	0	0	0	0	0	0	0	0	0	0	0	0	0	0	0	0	0	0	0	0	0	0	0	0	0	0	0	0	0	0	0	0	0	0
W	Araneae	Pseudanapis sp.1	LECZ-IBSP	IBSP 191819	No	0	0	0	0	0	0	0	0	0	0	1	1	0	0	0	0	0	0	0	0	0	0	0	0	0	0	0	0	0	0	0	0	0	0	0	0	0	0	0	0	0	0	0	0
D	Araneae	Anyphaenidae immature	LECZ-IBSP	IBSP 20170716549	No	0	0	0	0	0	0	0	0	0	0	0	0	0	0	0	0	0	0	0	0	0	0	0	0	0	0	0	0	0	0	0	0	0	0	0	0	1	0	1	0	0	0	0	0
D/W	Araneae	Alpaida aff. negro	LECZ-IBSP	IBSP 192197 - 192209	No	0	0	0	0	0	0	0	0	0	0	2	2	0	0	0	0	0	0	0	0	0	0	0	0	0	0	0	0	0	0	0	0	0	0	0	0	0	1	1	0	0	0	0	0
D/W	Araneae	Alpaida sp.2	LECZ-IBSP	IBSP 193143	No	0	0	0	0	0	0	0	0	0	0	0	0	0	0	0	0	0	0	0	0	0	0	0	0	0	0	0	0	0	0	0	0	0	0	0	0	0	0	0	0	0	0	0	0
D/W	Araneae	Araneidae immature	LECZ-IBSP	IBSP 20170716549	No	0	0	0	0	0	0	1	2	3	0	0	0	0	0	0	1	0	1	5	1	6	0	0	0	0	0	0	2	0	2	1	0	1	0	0	0	3	0	3	1	0	1	0	0
D	Araneae	Barychelidae gen.1 sp.1	LECZ-IBSP	IBSP 191642	No	0	0	0	0	0	0	0	0	0	0	0	0	0	0	0	0	0	0	0	0	0	0	0	0	0	0	0	0	0	0	0	0	0	0	0	0	0	0	0	0	0	0	0	0
D/W	Araneae	Nops sp.1	LECZ-IBSP	IBSP 191643 191644	No	0	0	0	0	0	0	0	1	1	0	0	0	0	0	0	0	0	0	0	0	0	0	0	0	0	0	0	0	0	0	0	0	0	0	0	0	0	0	0	1	0	1	0	0
D	Araneae	Corinna sp.1	LECZ-IBSP	IBSP 193126	No	0	0	0	0	0	0	0	0	0	0	0	0	0	0	0	0	0	0	0	0	0	0	0	0	0	0	0	0	0	0	0	0	0	0	0	0	0	0	0	0	0	0	0	0
D/W	Araneae	Corinnidae immature	LECZ-IBSP	IBSP 20170716549	No	0	0	0	0	0	0	5	1	6	0	2	2	0	0	0	0	0	0	3	0	3	0	0	0	0	0	0	0	0	0	0	0	0	0	0	0	0	1	1	0	0	0	0	0
D/W	Araneae	Creugas sp.1	LECZ-IBSP	IBSP 192592 - 192594	No	0	0	0	0	0	0	0	1	1	0	0	0	0	0	0	0	0	0	0	0	0	0	0	0	0	0	0	0	0	0	0	0	0	0	0	0	0	0	0	0	0	0	0	0
D	Araneae	Paradiestus sp.1	LECZ-IBSP	IBSP 191743	No	0	0	0	0	0	0	0	0	0	0	0	0	0	0	0	0	0	0	0	0	0	0	0	0	0	0	0	0	0	0	0	0	0	0	0	0	0	0	0	0	0	0	0	0
D/W	Araneae	Tupirinna sp.1	LECZ-IBSP	IBSP 191741	No	0	0	0	0	0	0	0	0	0	0	0	0	0	0	0	0	0	0	0	0	0	0	0	0	0	0	0	0	0	0	0	0	0	0	0	0	1	2	3	0	0	0	0	0
D/W	Araneae	Ctenidae immature	LECZ-IBSP	IBSP 20170716549	No	1	1	2	0	0	0	0	0	0	0	0	0	1	1	2	0	0	0	0	1	1	0	0	0	0	1	1	0	0	0	0	0	0	0	0	0	0	1	1	0	0	0	0	0
D	Araneae	Isoctenus sp.1	LECZ-IBSP	IBSP 191634 - 191636	No	0	0	0	0	0	0	0	0	0	0	0	0	2	0	2	0	0	0	0	0	0	0	0	0	0	0	0	0	0	0	0	0	0	0	0	0	0	0	0	0	0	0	0	0
D	Araneae	Nothroctenus sp.1	LECZ-IBSP	IBSP 191641	No	0	0	0	0	0	0	0	0	0	0	0	0	0	0	0	0	0	0	0	0	0	0	0	0	0	0	0	0	0	0	0	0	0	0	0	0	0	0	0	0	0	0	0	0
W	Araneae	Ctenizidae gen.1 sp.1	LECZ-IBSP	IBSP 193127	No	0	0	0	0	0	0	0	0	0	0	0	0	0	0	0	0	0	0	0	0	0	0	0	0	0	0	0	0	0	0	0	0	0	0	0	0	0	0	0	0	0	0	0	0
D/W	Araneae	Dipluridae immature	LECZ-IBSP	IBSP 20170716549	No	0	0	0	0	0	0	0	0	0	0	0	0	0	0	0	1	0	1	0	0	0	0	0	0	0	0	0	0	0	0	0	0	0	0	0	0	0	0	0	0	0	0	0	0
D/W	Araneae	Drymusidae immature	LECZ-IBSP	IBSP 20170716549	No	0	0	0	0	0	0	0	0	0	0	0	0	0	0	0	0	0	0	0	0	0	0	0	0	5	1	6	2	0	2	0	0	0	5	2	7	0	0	0	0	0	0	0	0
D/W	Araneae	Filistatidae immature	LECZ-IBSP	IBSP 20170716549	No	0	0	0	0	0	0	0	0	0	0	0	0	0	0	0	0	0	0	0	0	0	0	0	0	0	0	0	0	0	0	0	2	2	0	0	0	0	0	0	0	0	0	1	1
D/W	Araneae	Misionella carajas	LECZ-IBSP	IBSP 192511 - 192513	No	0	0	0	0	0	0	0	0	0	0	0	0	0	0	0	0	0	0	0	0	0	0	0	0	0	0	0	0	0	0	0	0	0	0	0	0	0	0	0	0	0	0	0	0
D/W	Araneae	Gnaphosidae immature	LECZ-IBSP	IBSP 20170716549	No	0	0	0	0	0	0	0	0	0	0	0	0	0	0	0	1	0	1	0	0	0	0	0	0	0	0	0	0	0	0	0	0	0	0	0	0	0	0	0	0	0	0	0	0
D	Araneae	Neohahnia sp.1	LECZ-IBSP	IBSP 193032	No	0	0	0	0	0	0	0	0	0	0	0	0	0	0	0	0	0	0	0	0	0	0	0	0	0	0	0	0	0	0	0	0	0	0	0	0	0	0	0	0	0	0	0	0
W	Araneae	Agyneta sp.1	LECZ-IBSP	IBSP 192549	No	0	0	0	0	0	0	0	0	0	0	0	0	0	0	0	0	0	0	0	0	0	0	0	0	0	0	0	0	0	0	0	0	0	0	0	0	0	0	0	0	0	0	0	0
W	Araneae	Ero sp.1	LECZ-IBSP	IBSP 192073	No	0	1	1	0	0	0	0	0	0	0	0	0	0	0	0	0	0	0	0	0	0	0	0	0	0	0	0	0	0	0	0	0	0	0	0	0	0	0	0	0	0	0	0	0
W	Araneae	Mysmenidae immature	LECZ-IBSP	IBSP 20170716549	No	0	0	0	0	0	0	0	0	0	0	0	0	0	0	0	0	0	0	0	0	0	0	0	0	0	0	0	0	0	0	0	0	0	0	0	0	0	0	0	0	0	0	0	0
D/W	Araneae	Ochyrocera sp.1	LECZ-IBSP	IBSP 192218 - 192233	No	12	11	23	0	0	0	11	4	15	1	1	2	1	7	8	0	0	0	0	0	0	0	0	0	1	1	2	0	0	0	0	0	0	0	0	0	0	0	0	0	0	0	0	0
D/W	Araneae	Ochyroceratidae immature	LECZ-IBSP	IBSP 20170716549	No	12	8	20	3	1	4	10	31	41	0	0	0	3	3	6	0	1	1	0	0	0	1	0	1	6	0	6	1	0	1	1	0	1	1	1	2	3	2	5	0	0	0	0	1
D/W	Araneae	Speocera sp.1	LECZ-IBSP	IBSP 192824 - 192881	No	8	7	15	1	2	3	10	37	47	0	7	7	0	4	4	0	0	0	0	0	0	1	3	4	9	3	12	7	2	9	2	7	9	2	0	2	2	2	4	0	0	0	0	0
D/W	Araneae	Theotima aff. minuta	LECZ-IBSP	IBSP 191902 - 191905	No	3	2	5	0	0	0	0	0	0	0	0	0	0	0	0	0	0	0	0	1	1	0	0	0	0	0	0	1	1	2	0	0	0	0	0	0	0	0	0	0	1	1	0	0
D/W	Araneae	Gamasomorpha sp.1	LECZ-IBSP	IBSP 191575	No	0	0	0	0	0	0	0	0	0	0	0	0	0	0	0	0	0	0	0	0	0	0	0	0	0	0	0	0	0	0	0	0	0	0	0	0	0	1	1	0	0	0	1	0
D/W	Araneae	Neotrops sp.1	LECZ-IBSP	IBSP 191747 - 191748	No	0	0	0	0	0	0	0	0	0	0	0	0	0	0	0	0	0	0	0	0	0	0	0	0	0	0	0	0	0	0	0	0	0	0	0	0	0	1	1	0	0	0	0	0
D	Araneae	Neoxyphinus sp.1	LECZ-IBSP	IBSP 191912	No	0	0	0	0	0	0	8	0	8	0	0	0	0	0	0	0	0	0	0	0	0	0	0	0	0	0	0	0	0	0	0	0	0	0	0	0	0	0	0	0	0	0	0	0
D/W	Araneae	Oonopidae gen.n.1 sp.1	LECZ-IBSP	IBSP 191579	No	0	0	0	0	0	0	0	0	0	0	0	0	0	0	0	0	0	0	0	0	0	0	0	0	0	0	0	0	0	0	0	0	0	0	0	0	0	0	0	0	0	0	0	0
D/W	Araneae	Oonopidae immature	LECZ-IBSP	IBSP 20170716549	No	0	0	0	0	0	0	0	0	0	0	0	0	0	0	0	0	0	0	0	0	0	0	0	0	0	0	0	0	0	0	0	0	0	3	0	3	0	0	0	0	0	0	0	0
D/W	Araneae	Stenoonops sp.1	LECZ-IBSP	IBSP 193087 - 193093	No	0	0	0	0	0	0	0	0	0	0	0	0	0	0	0	0	0	0	0	0	0	0	0	0	0	0	0	0	0	0	1	0	1	0	0	0	0	0	0	0	0	0	0	0
W	Araneae	Stenoonops sp.3	LECZ-IBSP	IBSP 193174	No	0	0	0	0	0	0	0	0	0	0	0	0	0	0	0	0	0	0	0	0	0	0	0	0	0	0	0	0	1	1	0	0	0	0	1	1	0	0	0	0	0	0	0	0
D	Araneae	Oxyopidae immature	LECZ-IBSP	IBSP 20170716549	No	0	0	0	0	0	0	0	0	0	0	0	0	0	0	0	0	0	0	0	0	0	0	0	0	0	0	0	0	0	0	0	0	0	0	0	0	0	0	0	0	0	0	0	0
D	Araneae	Otiothops sp.1	LECZ-IBSP	IBSP 193101	No	0	0	0	0	0	0	0	0	0	0	0	0	0	0	0	0	0	0	0	0	0	0	0	0	0	0	0	0	0	0	0	0	0	0	0	0	0	0	0	0	0	0	0	0
D/W	Araneae	Palpimanidae immature	LECZ-IBSP	IBSP 20170716549	No	0	0	0	0	0	0	0	0	0	1	0	1	0	0	0	0	0	0	0	0	0	0	0	0	0	0	0	0	0	0	0	0	0	0	0	0	0	0	0	0	0	0	0	0
D	Araneae	Paratropis sp.1	LECZ-IBSP	IBSP 191813	No	0	0	0	0	0	0	0	0	0	0	0	0	0	0	0	0	0	0	0	0	0	0	0	0	0	0	0	0	0	0	0	0	0	0	0	0	0	0	0	0	0	0	0	0
D/W	Araneae	Ibotyporanga sp.1	LECZ-IBSP	IBSP 193161	No	0	0	0	0	3	3	0	0	0	0	0	0	0	0	0	0	0	0	0	2	2	0	0	0	0	2	2	0	0	0	0	0	0	0	0	0	0	1	1	0	1	1	0	0
D/W	Araneae	Mesabolivar sp.1	LECZ-IBSP	IBSP 191537 - 191554	No	3	7	10	1	4	5	2	0	2	0	1	1	0	0	0	4	6	10	2	6	8	1	3	4	0	6	6	0	0	0	0	0	0	0	0	0	3	2	5	2	0	2	1	4
D/W	Araneae	Mesabolivar sp.2	LECZ-IBSP	IBSP 191829	No	0	0	0	0	0	0	0	0	0	0	0	0	0	0	0	0	0	0	0	0	0	0	0	0	0	0	0	0	0	0	0	0	0	0	0	0	0	0	0	0	0	0	0	0
D/W	Araneae	Mesabolivar sp.3	LECZ-IBSP	IBSP 191763	No	0	0	0	0	0	0	0	0	0	0	0	0	0	0	0	0	0	0	0	0	0	0	0	0	0	0	0	0	0	0	0	0	0	0	0	0	0	0	0	0	0	0	0	0
D/W	Araneae	Metagonia sp.1	LECZ-IBSP	IBSP 192617 - 192628	No	0	0	0	0	0	0	0	0	0	0	0	0	0	0	0	0	0	0	0	0	0	0	0	0	0	0	0	0	0	0	0	0	0	0	3	3	0	0	0	0	0	0	0	0
D/W	Araneae	Ninetinae sp.1	LECZ-IBSP	IBSP 192603	No	0	0	0	0	0	0	0	0	0	0	0	0	0	0	0	0	0	0	0	0	0	0	0	0	0	0	0	0	0	0	0	0	0	0	0	0	0	0	0	0	0	0	0	0
D/W	Araneae	Pholcidae immature	LECZ-IBSP	IBSP 20170716549	No	4	10	14	3	0	3	1	2	3	1	0	1	2	4	6	0	0	0	3	0	3	0	1	1	0	5	5	1	1	2	2	7	9	1	4	5	2	3	5	0	0	0	2	2
D/W	Araneae	aff. Lygromma sp.2	LECZ-IBSP	IBSP 193481	No	0	0	0	0	0	0	0	0	0	0	0	0	0	0	0	0	0	0	0	0	0	0	0	0	0	0	0	0	0	0	0	0	0	0	0	0	0	0	0	0	0	0	0	0
D/W	Araneae	Lygromma sp.1	LECZ-IBSP	IBSP 193489	No	0	0	0	0	0	0	0	0	0	0	0	0	0	0	0	0	0	0	0	0	0	0	0	0	0	0	0	0	0	0	0	0	0	0	0	0	0	0	0	0	0	0	0	0
D/W	Araneae	Prodidomidae immature	LECZ-IBSP	IBSP 20170716549	No	0	0	0	0	0	0	0	0	0	0	0	0	0	0	0	0	0	0	0	0	0	0	0	0	0	0	0	0	0	0	0	0	0	0	0	0	0	0	0	0	0	0	0	0
D	Araneae	Asaphobelis sp.1	LECZ-IBSP	IBSP 192193	No	0	0	0	0	0	0	0	0	0	0	0	0	0	0	0	0	0	0	0	0	0	0	0	0	0	0	0	0	0	0	0	0	0	0	0	0	0	0	0	0	0	0	0	0
D/W	Araneae	Salticidae immature	LECZ-IBSP	IBSP 20170716549	No	1	0	1	2	0	2	0	0	0	10	2	12	0	0	0	0	0	0	2	0	2	1	2	3	0	0	0	1	1	2	0	0	0	2	2	4	0	0	0	0	0	0	1	0
W	Araneae	Salticidae sp.1	LECZ-IBSP	IBSP 191806	No	0	0	0	0	0	0	0	0	0	0	0	0	0	0	0	0	0	0	0	0	0	0	0	0	0	0	0	0	0	0	0	0	0	0	0	0	0	0	0	0	0	0	0	0
D	Araneae	Salticidae sp.2	LECZ-IBSP	IBSP 192575	No	0	0	0	0	0	0	0	0	0	0	0	0	0	0	0	0	0	0	0	0	0	0	0	0	0	0	0	0	0	0	0	0	0	0	0	0	0	0	0	0	0	0	0	0
D/W	Araneae	Salticidae sp.4	LECZ-IBSP	IBSP 191808	No	0	0	0	0	0	0	0	0	0	0	0	0	0	0	0	0	0	0	0	0	0	0	0	0	0	0	0	0	0	0	0	0	0	0	0	0	0	0	0	0	0	0	0	0
D	Araneae	Salticidae sp.5	LECZ-IBSP	IBSP 191809	No	0	0	0	0	0	0	0	0	0	0	0	0	0	0	0	0	0	0	0	0	0	0	0	0	0	0	0	0	0	0	0	0	0	0	0	0	0	0	0	0	0	0	0	0
D/W	Araneae	Soesilarischius sp.1	LECZ-IBSP	IBSP 191804	No	0	0	0	0	0	0	0	0	0	0	0	0	0	0	0	0	0	0	0	0	0	0	0	0	2	2	4	0	2	2	0	0	0	5	0	5	2	1	3	0	0	0	0	0
D/W	Araneae	Soesilarischius sp.2	LECZ-IBSP	IBSP 192675 - 192678	No	0	0	0	0	0	0	0	0	0	0	0	0	0	0	0	0	0	0	0	0	0	0	0	0	0	0	0	0	0	0	0	0	0	0	0	0	0	0	0	0	0	0	0	0
D/W	Araneae	Soesilarischius sp.3	LECZ-IBSP	IBSP 192576	No	0	0	0	0	0	0	0	0	0	0	0	0	0	0	0	0	0	0	0	0	0	0	0	0	0	0	0	0	0	0	0	0	0	0	0	0	0	0	0	0	0	0	0	0
D/W	Araneae	Scytodes sp.1	LECZ-IBSP	IBSP 192783 - 192789	No	6	3	9	0	0	0	36	32	68	5	4	9	1	0	1	1	0	1	0	0	0	2	0	2	1	1	2	0	7	7	0	0	0	1	2	3	8	6	14	6	1	7	0	1
W	Araneae	Scytodes sp.2	LECZ-IBSP	IBSP 192780	No	0	0	0	0	0	0	0	0	0	0	0	0	0	0	0	0	0	0	0	0	0	0	0	0	0	0	0	0	0	0	0	0	0	0	0	0	0	0	0	0	0	0	0	0
D	Araneae	Ariadna sp.1	LECZ-IBSP	IBSP 192518	No	0	0	0	0	0	0	0	0	0	0	0	0	0	0	0	0	0	0	0	0	0	0	0	0	0	0	0	0	0	0	0	0	0	0	0	0	1	0	1	0	0	0	0	0
D/W	Araneae	Segestriidae immature	LECZ-IBSP	IBSP 20170716549	No	0	0	0	0	0	0	0	0	0	0	0	0	0	0	0	0	0	0	0	0	0	0	0	0	0	1	1	0	0	0	0	0	0	0	0	0	0	0	0	0	0	0	0	0
D	Araneae	Sicariidae immature	LECZ-IBSP	IBSP 20170716549	No	0	0	0	0	0	0	0	0	0	0	0	0	0	0	0	0	0	0	0	0	0	0	0	0	1	0	1	0	0	0	0	0	0	0	0	0	0	0	0	0	0	0	0	0
D/W	Araneae	Sparassidae immature	LECZ-IBSP	IBSP 20170716549	No	0	0	0	0	0	0	0	0	0	0	0	0	0	0	0	0	0	0	0	0	0	0	0	0	0	0	0	0	0	0	0	0	0	0	0	0	0	0	0	0	0	0	0	0
D/W	Araneae	Anapistula sp.1	LECZ-IBSP	IBSP 191900	No	0	0	0	0	0	0	0	0	0	0	0	0	0	0	0	0	0	0	0	0	0	0	0	0	0	1	1	2	0	2	0	0	0	0	0	0	0	0	0	0	0	0	0	0
D/W	Araneae	Symphytognathidae immature	LECZ-IBSP	IBSP 20170716549	No	0	0	0	0	0	0	0	0	0	0	0	0	0	0	0	0	0	0	0	0	0	0	0	0	0	0	0	0	0	0	0	0	0	1	0	1	0	0	0	0	0	0	0	0
D	Araneae	aff. Matta sp.1	LECZ-IBSP	IBSP 193042	No	0	0	0	0	0	0	0	0	0	0	0	0	0	0	0	0	0	0	0	0	0	0	0	0	0	0	0	0	0	0	0	0	0	0	0	0	0	0	0	0	0	0	0	0
W	Araneae	Azilia histrio	LECZ-IBSP	IBSP 191817	No	0	0	0	0	0	0	0	0	0	0	0	0	0	0	0	0	0	0	0	0	0	0	0	0	0	0	0	0	0	0	0	0	0	0	0	0	0	0	0	0	0	0	0	0
D/W	Araneae	Tetragnathidae immature	LECZ-IBSP	IBSP 20170716549	No	0	0	0	0	0	0	0	0	0	0	0	0	0	0	0	0	0	0	0	0	0	0	0	0	0	0	0	0	0	0	0	0	0	0	0	0	0	0	0	0	0	0	0	0
W	Araneae	Acanthoscurria theraphosoides	LECZ-IBSP	IBSP 191640	No	0	0	0	0	0	0	0	0	0	0	0	0	0	0	0	0	0	0	0	0	0	0	0	0	0	0	0	0	0	0	0	0	0	0	0	0	0	0	0	0	0	0	0	0
W	Araneae	Magulla sp.1	LECZ-IBSP	IBSP 191633	No	0	0	0	0	0	0	0	0	0	0	0	0	0	0	0	0	0	0	0	0	0	0	0	0	0	0	0	0	0	0	0	0	0	0	0	0	0	0	0	0	0	0	0	0
D/W	Araneae	Theraphosidae immature	LECZ-IBSP	IBSP 20170716549	No	0	0	0	4	4	8	1	5	6	2	1	3	1	0	1	0	0	0	0	0	0	0	0	0	1	1	2	0	3	3	0	0	0	1	0	1	2	1	3	0	0	0	0	0
D	Araneae	Stemmops sp.1	LECZ-IBSP	IBSP 191907	No	0	0	0	0	0	0	7	0	7	0	0	0	0	0	0	0	0	0	0	0	0	0	0	0	0	0	0	0	0	0	0	0	0	0	0	0	0	0	0	0	0	0	0	0
D/W	Araneae	Theridiidae immature	LECZ-IBSP	IBSP 20170716549	No	0	0	0	4	3	7	1	6	7	0	0	0	1	0	1	0	0	0	0	1	1	0	0	0	0	1	1	0	0	0	0	0	0	0	0	0	1	0	1	1	0	1	0	0
D/W	Araneae	Theridion sp.1	LECZ-IBSP	IBSP 191734	No	0	0	0	0	0	0	6	4	10	0	0	0	0	0	0	0	0	0	0	2	2	0	0	0	0	0	0	0	0	0	0	0	0	0	0	0	0	0	0	0	0	0	0	0
D/W	Araneae	Theridion sp.2	LECZ-IBSP	IBSP 192541	No	1	0	1	0	0	0	0	0	0	0	0	0	0	0	0	0	0	0	0	0	0	1	0	1	0	0	0	0	0	0	0	0	0	0	0	0	0	0	0	0	0	0	0	0
D/W	Araneae	Thymoites sp.1	LECZ-IBSP	IBSP 191738	No	0	0	0	0	1	1	0	1	1	0	0	0	0	0	0	0	0	0	0	0	0	0	0	0	1	0	1	0	0	0	0	0	0	0	1	1	0	0	0	0	0	0	0	0
D/W	Araneae	Plato sp.1	LECZ-IBSP	IBSP 192921 - 192970	No	1	12	13	0	4	4	4	6	10	0	0	0	0	0	0	0	0	0	0	0	0	0	2	2	0	0	0	1	1	2	4	34	38	0	1	1	0	3	3	0	0	0	0	1
D/W	Araneae	Theridiosomatidae immature	LECZ-IBSP	IBSP 20170716549	No	5	1	6	0	0	0	0	3	3	1	0	1	0	0	0	0	0	0	0	0	0	0	0	0	3	0	3	0	0	0	0	0	0	0	0	0	0	0	0	0	1	1	0	0
W	Araneae	Misumenops sp.1	LECZ-IBSP	IBSP 193164	No	0	0	0	0	0	0	0	0	0	0	0	0	0	0	0	0	0	0	0	0	0	0	0	0	0	0	0	0	0	0	0	0	0	0	0	0	0	0	0	0	0	0	0	0
D/W	Araneae	Trechalea sp.1	LECZ-IBSP	IBSP 193125	No	0	0	0	0	0	0	0	0	0	0	0	0	0	0	0	0	0	0	0	0	0	0	0	0	0	0	0	0	0	0	0	0	0	0	0	0	0	0	0	0	0	0	0	0
D/W	Araneae	Trechaleidae immature	LECZ-IBSP	IBSP 20170716549	No	0	0	0	0	0	0	0	1	1	0	0	0	0	0	0	0	0	0	0	0	0	0	0	0	0	0	0	0	0	0	0	0	0	0	0	0	0	0	0	0	0	0	0	0
D	Araneae	Uloboridae immature	LECZ-IBSP	IBSP 20170716549	No	0	0	0	0	0	0	0	0	0	0	0	0	0	0	0	0	0	0	0	0	0	0	0	0	0	0	0	0	0	0	0	0	0	0	0	0	0	0	0	0	0	0	0	0
W	Araneae	Uloborus sp.1	LECZ-IBSP	IBSP 192506	No	0	0	0	0	0	0	0	0	0	0	0	0	0	0	0	0	0	0	0	0	0	0	0	0	0	0	0	0	0	0	0	0	0	0	0	0	0	0	0	0	0	0	0	0
D/W	Amblypygi	Charinus carajas	ISLA-UFLA	ISLA 43705	No	3	1	4	0	0	0	10	18	28	1	0	1	0	1	1	0	0	0	0	0	0	0	0	0	0	0	0	0	0	0	1	0	1	0	0	0	0	0	0	0	2	2	0	0
D/W	Amblypygi	Heterophrynus longicornis	ISLA-UFLA	ISLA 43706	No	1	2	3	3	0	3	6	2	8	2	3	5	4	7	11	0	2	2	0	0	0	0	0	0	0	0	0	0	0	0	1	1	2	0	0	0	0	1	1	0	1	1	1	2
W	Schizomida	Cangazomus xikrin	MZUSP	MZSP-71454	No	0	0	0	0	0	0	0	0	0	0	0	0	0	0	0	0	0	0	0	0	0	0	0	0	0	0	0	0	0	0	0	0	0	0	0	0	0	0	0	0	0	0	0	0
W	Schizomida	Cangazomus sp.1	MZUSP	MZSP-71459	No	0	0	0	0	0	0	0	0	0	0	0	0	0	0	0	0	0	0	0	0	0	0	0	0	0	0	0	0	0	0	0	0	0	0	0	0	0	0	0	0	0	0	0	0
D/W	Schizomida	Naderiore carajas	MZUSP	MZSP-71452	No	0	0	0	0	0	0	3	0	3	0	0	0	0	1	1	0	0	0	0	0	0	0	0	0	0	0	0	0	0	0	0	0	0	0	0	0	0	0	0	0	0	0	0	0
D/W	Schizomida	Hubbardiidae immature	-	-	No	0	0	0	0	0	0	0	0	0	0	1	1	0	0	0	0	0	0	0	0	0	0	0	0	0	0	0	0	0	0	0	0	0	0	1	1	0	0	0	0	0	0	0	0
W	Geophilomorpha	Ballophilidae gen.1 sp.1	CZUFMT	CZUFMT-MY 0524	No	0	0	0	0	0	0	0	0	0	0	1	1	0	0	0	0	0	0	0	0	0	0	0	0	0	0	0	0	0	0	0	0	0	0	0	0	0	0	0	0	0	0	0	0
D	Geophilomorpha	Ityphilus sp.1	CZUFMT	CZUFMT-MY 0523	No	0	0	0	0	0	0	0	0	0	0	0	0	0	0	0	0	0	0	0	0	0	0	0	0	0	0	0	0	0	0	0	0	0	0	0	0	0	0	0	0	0	0	0	0
W	Geophilomorpha	Geophilidae gen.1 sp.1	CZUFMT	CZUFMT-MY 0522	No	0	0	0	0	0	0	0	0	0	0	0	0	0	0	0	0	0	0	0	0	0	0	0	0	0	0	0	0	0	0	0	0	0	0	0	0	0	0	0	0	0	0	0	0
D/W	Scolopendromorpha	Cryptops sp.1	CZUFMT	CZUFMT-MY 0533	No	0	0	0	0	0	0	0	2	2	0	2	2	0	0	0	0	0	0	0	0	0	0	0	0	0	0	0	1	0	1	0	0	0	0	0	0	0	0	0	0	0	0	0	0
D/W	Scolopendromorpha	Otostigmus aff. amazonae	CZUFMT	CZUFMT-MY 0530	No	0	0	0	0	0	0	0	0	0	0	0	0	0	0	0	0	0	0	0	0	0	0	0	0	0	0	0	0	0	0	0	0	0	0	0	0	0	0	0	0	0	0	0	0
W	Scolopendromorpha	Otostigmus sp.1	CZUFMT	CZUFMT-MY 0531	No	0	0	0	0	0	0	0	1	1	0	0	0	0	0	0	0	0	0	0	0	0	0	0	0	0	0	0	0	0	0	0	0	0	0	0	0	0	0	0	0	0	0	0	0
D/W	Scolopendromorpha	Scolopendropsis sp.1	CZUFMT	CZUFMT-MY 0518	No	0	0	0	0	0	0	0	0	0	0	0	0	0	0	0	0	0	0	0	0	0	0	0	0	0	0	0	0	0	0	0	0	0	0	0	0	0	0	0	0	0	0	0	0
D/W	Scolopendromorpha	Newportia (Newportia) ernsti fossulata	CZUFMT	CZUFMT-MY 0508	No	0	0	0	0	0	0	0	0	0	0	0	0	0	0	0	0	0	0	0	0	0	0	0	0	1	1	2	0	0	0	0	0	0	0	0	0	0	0	0	0	0	0	1	0
W	Scolopendromorpha	Newportia (Newportia) sp.1	CZUFMT	CZUFMT-MY 0513	No	0	0	0	0	0	0	0	0	0	0	0	0	0	0	0	0	0	0	0	0	0	0	0	0	0	0	0	0	0	0	0	0	0	0	0	0	0	0	0	0	0	0	0	0
D/W	Scolopendromorpha	Newportia (Tidops) nisargani	CZUFMT	CZUFMT-MY 0509	No	0	0	0	0	0	0	1	0	1	0	0	0	0	0	0	0	0	0	0	0	0	0	2	2	0	0	0	0	0	0	0	0	0	0	0	0	0	0	0	0	0	0	0	0
D/W	Scolopendromorpha	Scolopocryptops miersii	CZUFMT	CZUFMT-MY 0517	No	0	0	0	0	0	0	0	0	0	0	0	0	0	0	0	0	0	0	0	0	0	0	0	0	0	0	0	0	0	0	0	0	0	0	0	0	0	0	0	0	0	0	0	0
D/W	Scutigeromorpha	Sphendononema guindingii	CZUFMT	CZUFMT-MY 0515	No	0	0	0	1	0	1	0	1	1	0	0	0	2	0	2	0	0	0	0	0	0	1	1	2	0	0	0	0	0	0	5	1	6	1	1	2	0	0	0	1	0	1	0	0
W	Symphyla	Scolopendrellopsis sp.1	ISLA-UFLA	ISLA 43707	No	0	0	0	0	0	0	0	0	0	0	0	0	0	0	0	0	0	0	0	0	0	0	0	0	0	0	0	0	0	0	0	0	0	0	0	0	0	0	0	0	0	0	0	0
D/W	Symphyla	cf. Scutigerella sp.1	ISLA-UFLA	ISLA 43708	No	0	0	0	0	0	0	2	0	2	0	0	0	0	0	0	0	0	0	0	0	0	0	0	0	0	1	1	0	0	0	0	0	0	0	2	2	0	0	0	0	0	0	0	0
D/W	Symphyla	Hanseniella sp.1	ISLA-UFLA	ISLA 43709	No	0	0	0	0	0	0	0	0	0	0	0	0	0	0	0	0	0	0	0	0	0	0	0	0	0	0	0	0	0	0	0	0	0	0	1	1	0	0	0	0	0	0	0	0
D/W	Symphyla	Scutigerellidae indet.	-	-	No	0	0	0	0	0	0	0	0	0	0	0	0	0	0	0	0	0	0	0	0	0	0	0	0	0	0	0	0	0	0	0	0	0	0	0	0	0	0	0	0	0	0	0	0
D/W	Pauropodina	Pauropodidae sp.1	ISLA-UFLA	ISLA 43710	No	1	0	1	0	0	0	0	1	1	0	0	0	0	0	0	0	0	0	0	0	0	0	0	0	0	0	0	0	0	0	0	0	0	0	0	0	0	0	0	0	0	0	0	0
W	Pauropodina	Pauropodidae sp.2	ISLA-UFLA	ISLA 43711	No	0	2	2	0	0	0	0	0	0	0	0	0	0	0	0	0	0	0	0	0	0	0	0	0	0	0	0	0	0	0	0	0	0	0	0	0	0	0	0	0	0	0	0	0
D/W	Spirostreptida	Spirostreptidae gen.1 sp.1	LECZ-IBSP	IBSP 5006	No	0	1	1	2	0	2	2	1	3	0	0	0	0	0	0	0	0	0	0	0	0	1	1	2	0	0	0	0	0	0	0	1	1	1	0	1	0	0	0	0	0	0	0	0
D/W	Glomeridesmida	Glomeridesmus sp.1	LECZ-IBSP	IBSP 5047	Yes	0	0	0	0	0	0	5	0	5	0	0	0	0	0	0	0	0	0	0	0	0	0	0	0	0	0	0	0	0	0	0	0	0	0	0	0	0	0	0	0	0	0	0	0
D/W	Polydesmida	Parastenonia sp.1	LECZ-IBSP	IBSP 5008	No	0	0	0	0	0	0	0	0	0	0	1	1	0	0	0	0	0	0	0	0	0	0	0	0	0	0	0	0	0	0	3	1	4	0	0	0	0	0	0	0	0	0	0	0
D/W	Polydesmida	Fuhrmannodesmidae gen.1 sp.1	LECZ-IBSP	IBSP 5058	No	0	1	1	0	0	0	6	0	6	0	0	0	0	0	0	0	0	0	0	0	0	0	0	0	0	0	0	0	0	0	0	1	1	0	0	0	0	0	0	0	0	0	0	0
D/W	Polydesmida	Pyrgodesmidae gen.1 sp.2	LECZ-IBSP	IBSP 5055	Yes	3	5	8	0	1	1	3	1	4	0	0	0	0	0	0	0	0	0	0	0	0	0	0	0	0	0	0	0	0	0	1	4	5	0	0	0	0	0	0	0	0	0	0	0
W	Polyxenida	Polyxenidae sp.1	LECZ-IBSP	IBSP 4682	No	0	0	0	0	0	0	0	0	0	0	0	0	0	0	0	0	0	0	0	0	0	0	0	0	0	0	0	0	0	0	0	0	0	0	0	0	0	0	0	0	0	0	0	0
D/W	Decapoda	Macrobrachium sp.1	ISLA-UFLA	ISLA 43712	No	0	0	0	0	0	0	0	0	0	0	0	0	0	0	0	0	0	0	0	0	0	0	0	0	0	0	0	0	0	0	0	0	0	0	0	0	0	0	0	0	0	0	0	0
D/W	Decapoda	Microthelphusa somanni	ISLA-UFLA	ISLA 43713	No	0	0	0	0	0	0	0	0	0	0	0	0	0	0	0	0	0	0	0	0	0	0	0	0	0	0	0	0	0	0	0	0	0	0	0	0	0	0	0	0	0	0	0	0
W	Amphipoda	cf. Bogidiella sp.1	ISLA-UFLA	ISLA 44119	Yes	0	0	0	0	0	0	0	0	0	0	0	0	0	0	0	0	0	0	0	0	0	0	0	0	0	0	0	0	0	0	0	0	0	0	0	0	0	0	0	0	0	0	0	0
D/W	Amphipoda	Hyalella sp.2	ISLA-UFLA	ISLA 44118	Yes	0	0	0	0	0	0	0	0	0	0	0	0	0	0	0	0	0	0	0	0	0	0	0	0	0	0	0	0	0	0	0	0	0	0	0	0	0	0	0	0	0	0	0	0
D/W	Isopoda	Ctenorillo ferrarai	ISLA-UFLA	ISLA 43714	No	0	0	0	0	1	1	0	1	1	0	0	0	0	0	0	0	0	0	0	0	0	0	0	0	1	0	1	1	0	1	0	0	0	0	0	0	0	3	3	0	0	0	0	0
W	Isopoda	Dubioniscidae immature	-	-	No	0	0	0	0	0	0	0	0	0	0	0	0	0	0	0	0	0	0	0	0	0	0	0	0	0	0	0	0	0	0	0	0	0	0	0	0	0	0	0	0	0	0	0	0
D/W	Isopoda	Dubioniscus sp.1	ISLA-UFLA	ISLA 43715	No	0	0	0	0	1	1	0	0	0	0	0	0	0	0	0	0	0	0	0	2	2	0	2	2	0	0	0	0	0	0	0	0	0	0	0	0	0	0	0	0	0	0	0	0
W	Isopoda	Dubioniscus sp.2	ISLA-UFLA	ISLA 43716	No	0	0	0	0	0	0	0	0	0	0	0	0	0	0	0	0	0	0	0	0	0	0	0	0	0	0	0	0	0	0	0	0	0	0	0	0	0	0	0	0	0	0	0	0
D	Isopoda	Benthana sp.1	ISLA-UFLA	ISLA 43717	No	0	0	0	0	0	0	0	0	0	0	0	0	0	0	0	0	0	0	0	0	0	0	0	0	0	0	0	0	0	0	0	0	0	0	0	0	0	0	0	0	0	0	0	0
D/W	Isopoda	Philosciidae sp.1	ISLA-UFLA	ISLA 43718	No	0	0	0	0	0	0	0	0	0	0	1	1	0	1	1	0	0	0	0	0	0	0	0	0	0	0	0	0	0	0	0	0	0	0	0	0	0	0	0	0	0	0	0	0
D/W	Isopoda	Philosciidae sp.4	ISLA-UFLA	ISLA 43719	No	0	0	0	0	0	0	2	2	4	0	0	0	0	0	0	0	0	0	0	0	0	0	0	0	0	0	0	0	0	0	1	7	8	0	0	0	0	0	0	0	0	0	0	0
D/W	Isopoda	Pseudotyphloscia cf. alba	ISLA-UFLA	ISLA 43720	No	1	0	1	0	0	0	0	0	0	0	0	0	43	5	48	0	0	0	0	0	0	0	0	0	0	0	0	0	0	0	0	0	0	0	0	0	0	0	0	0	0	0	0	0
D	Isopoda	Trichorhina sp.1	ISLA-UFLA	ISLA 43721	Yes	0	0	0	0	0	0	0	0	0	0	0	0	0	0	0	0	0	0	0	0	0	0	0	0	0	0	0	0	0	0	0	0	0	0	0	0	0	0	0	0	0	0	0	0
D/W	Isopoda	Trichorhina sp.2	ISLA-UFLA	ISLA 43723	No	0	0	0	0	0	0	0	0	0	0	0	0	0	0	0	0	0	0	0	0	0	0	0	0	0	0	0	0	0	0	0	0	0	0	0	0	0	0	0	0	0	0	0	0
D/W	Isopoda	Circoniscus carajasensis	ISLA-UFLA	ISLA 43724	Yes	5	9	14	0	0	0	0	0	0	0	0	0	0	0	0	0	0	0	0	0	0	0	0	0	0	0	0	0	0	0	0	0	0	0	0	0	0	0	0	0	0	0	0	0
D/W	Isopoda	Circoniscus sp.1	ISLA-UFLA	ISLA 43725	No	0	0	0	0	0	0	0	0	0	0	0	0	0	0	0	0	0	0	0	0	0	0	0	0	0	0	0	0	0	0	1	2	3	0	0	0	0	0	0	0	0	0	0	0
W	Isopoda	Amazoniscus sp.1	ISLA-UFLA	ISLA 43726	No	0	0	0	0	0	0	0	0	0	0	2	2	0	0	0	0	0	0	0	0	0	0	0	0	0	0	0	0	0	0	0	0	0	0	0	0	0	0	0	0	0	0	0	0
W	Collembola	Ptenothrix sp.1	LSCC-UEPB	CRFSP 9683	No	0	0	0	0	0	0	0	0	0	0	0	0	0	0	0	0	0	0	0	0	0	0	0	0	0	0	0	0	0	0	0	0	0	0	0	0	0	0	0	0	0	0	0	0
D	Collembola	Campylothorax sp.4	LSCC-UEPB	CRFSP 9665	No	0	0	0	0	0	0	0	0	0	1	0	1	0	0	0	0	0	0	0	0	0	0	0	0	0	0	0	0	0	0	0	0	0	0	0	0	2	0	2	0	0	0	0	0
D/W	Collembola	Lepidonella sp.7	LSCC-UEPB	CRFSP 9664, 9677, 11464	No	2	3	5	0	0	0	14	15	29	0	0	0	0	0	0	0	0	0	0	0	0	4	0	4	0	0	0	0	2	2	0	41	41	0	5	5	0	0	0	0	0	0	0	0
D/W	Collembola	Trogolaphysa sp.2	LSCC-UEPB	CRFSP 9663, 9667, 9669, 9673,	Yes	8	50	58	0	0	0	9	3	12	20	3	23	1	7	8	0	0	0	0	1	1	0	0	0	1	8	9	1	6	7	24	42	66	11	0	11	0	6	6	0	3	3	0	0
D	Collembola	Mastigoceras sp.4	LSCC-UEPB	CRFSP 9647 - 9648	No	0	0	0	0	0	0	0	0	0	0	0	0	0	0	0	0	0	0	0	0	0	0	0	0	0	0	0	0	0	0	19	0	19	0	0	0	0	0	0	0	0	0	0	0
W	Collembola	Willemia sp.1	LSCC-UEPB	CRFSP 9650	No	0	0	0	0	0	0	0	0	0	0	0	0	0	0	0	0	0	0	0	0	0	0	0	0	0	0	0	0	0	0	0	0	0	0	0	0	0	0	0	0	0	0	0	0
D/W	Collembola	Hemisotoma thermophila	LSCC-UEPB	CRFSP 9688	No	0	0	0	0	0	0	0	0	0	0	0	0	0	0	0	0	0	0	0	0	0	0	0	0	0	0	0	0	0	0	0	0	0	0	0	0	0	0	0	0	0	0	0	0
D/W	Collembola	Isotomiella nummulifer	LSCC-UEPB	CRFSP 9684 - 9687, 9689-9690	No	0	10	10	0	0	0	3	12	15	0	0	0	0	0	0	0	0	0	0	0	0	0	0	0	0	2	2	0	10	10	0	0	0	0	7	7	0	0	0	0	1	1	0	0
D/W	Collembola	Cyphoderus agnotus	LSCC-UEPB	CRFSP 9653, 9657	No	0	0	0	0	0	0	0	4	4	0	0	0	8	4	12	0	0	0	0	0	0	0	0	0	0	0	0	0	0	0	0	0	0	0	0	0	0	0	0	0	0	0	0	0
D/W	Collembola	Cyphoderus innominatus	LSCC-UEPB	CRFSP 9652, 9656	No	0	0	0	0	0	0	0	0	0	0	0	0	0	0	0	0	0	0	0	0	0	0	0	0	0	5	5	0	4	4	0	0	0	0	0	0	0	0	0	0	0	0	0	0
D	Collembola	Cyphoderus similis	LSCC-UEPB	CRFSP 9659	No	0	0	0	0	0	0	0	0	0	0	0	0	0	0	0	0	0	0	0	0	0	0	0	0	0	0	0	0	0	0	0	0	0	0	0	0	0	0	0	0	0	0	0	0
D/W	Collembola	Cyphoderus sp.7	LSCC-UEPB	CRFSP 9655	No	0	0	0	0	0	0	0	2	2	0	0	0	0	0	0	0	0	0	0	0	0	0	0	0	6	0	6	0	0	0	0	0	0	0	0	0	0	0	0	0	0	0	0	0
D/W	Collembola	Lepidocyrtus sp.1	LSCC-UEPB	CRFSP 9654, 9674, 9678	No	0	0	0	0	0	0	0	0	0	0	0	0	0	0	0	0	0	0	0	0	0	0	0	0	0	0	0	0	0	0	38	0	38	0	0	0	0	0	0	0	0	0	0	0
W	Collembola	Lepidocyrtus sp.2	LSCC-UEPB	CRFSP 11466	No	0	0	0	0	0	0	0	0	0	0	0	0	0	0	0	0	0	0	0	0	0	0	0	0	0	0	0	0	0	0	0	0	0	0	0	0	0	0	0	0	0	0	0	0
W	Collembola	Pseudosinella sp.1	LSCC-UEPB	CRFSP 9660 - 9661	Yes	0	0	0	0	0	0	0	0	0	0	0	0	0	0	0	0	0	0	0	0	0	0	0	0	0	0	0	0	0	0	0	0	0	0	0	0	0	0	0	0	0	0	0	0
W	Collembola	Neotropiella sp.2	LSCC-UEPB	CRFSP 9644	No	0	0	0	0	0	0	0	0	0	0	0	0	0	0	0	0	0	0	0	0	0	0	0	0	0	0	0	0	0	0	0	0	0	0	0	0	0	0	0	0	0	0	0	0
W	Collembola	Neotropiella sp.3	LSCC-UEPB	CRFSP 9646	No	0	0	0	0	0	0	0	0	0	0	0	0	0	0	0	0	0	0	0	0	0	0	0	0	0	0	0	0	0	0	0	0	0	0	0	0	0	0	0	0	0	0	0	0
D	Collembola	Oncopodura sp.1	LSCC-UEPB	CRFSP 9658	No	0	0	0	0	0	0	2	0	2	0	0	0	0	0	0	0	0	0	0	0	0	0	0	0	0	0	0	0	0	0	0	0	0	0	0	0	0	0	0	0	0	0	0	0
D	Collembola	Seira ca. mirianae	LSCC-UEPB	CRFSP 9691	No	0	0	0	0	0	0	0	0	0	0	0	0	0	0	0	0	0	0	0	0	0	0	0	0	0	0	0	0	0	0	19	0	19	0	0	0	0	0	0	0	0	0	0	0
D/W	Collembola	Seira mendoncae	LSCC-UEPB	CRFSP 9666	No	0	0	0	0	0	0	0	0	0	4	0	4	0	0	0	0	0	0	0	1	1	0	6	6	0	0	0	0	0	0	0	0	0	0	0	0	0	0	0	0	0	0	0	4
D/W	Collembola	Seira prodiga	LSCC-UEPB	CRFSP 9671	No	0	0	0	0	0	0	0	0	0	0	0	0	0	0	0	0	0	0	0	0	0	0	0	0	0	0	0	12	0	12	0	0	0	0	0	0	0	0	0	0	0	0	0	0
D/W	Collembola	Allacma sp.1	LSCC-UEPB	CRFSP 9679, 11465	No	19	19	38	0	0	0	9	6	15	0	1	1	0	0	0	0	0	0	0	0	0	0	0	0	0	0	0	0	4	4	54	15	69	0	0	0	0	0	0	0	0	0	0	0
D	Collembola	Songhaica sp.1	LSCC-UEPB	CRFSP 9681	No	0	0	0	0	0	0	0	0	0	0	0	0	0	0	0	0	0	0	0	0	0	0	0	0	0	0	0	0	0	0	0	0	0	0	0	0	0	0	0	0	0	0	0	0
D/W	Diplura	Campodeidae gen1. sp.1	ISLA-UFLA	ISLA 43727	No	0	0	0	0	0	0	0	0	0	1	0	1	0	0	0	0	0	0	0	0	0	0	0	0	0	0	0	0	0	0	0	0	0	0	0	0	0	0	0	0	3	3	0	0
D/W	Diplura	Campodeidae gen1. sp.2	ISLA-UFLA	ISLA 43728	No	1	0	1	0	0	0	0	0	0	1	0	1	0	0	0	0	0	0	0	0	0	0	0	0	0	0	0	0	0	0	0	0	0	0	0	0	0	0	0	0	0	0	0	0
W	Diplura	Campodeidae gen2. sp.1	ISLA-UFLA	ISLA 43729	No	0	0	0	0	0	0	0	0	0	0	0	0	0	0	0	0	0	0	0	0	0	0	0	0	0	0	0	0	21	21	0	0	0	0	0	0	0	0	0	0	0	0	0	0
D/W	Diplura	Campodeidae gen2. sp.2	ISLA-UFLA	ISLA 43730	No	0	1	1	0	0	0	0	0	0	0	3	3	0	0	0	0	0	0	0	0	0	0	0	0	2	2	4	2	0	2	0	0	0	0	0	0	0	0	0	0	0	0	0	0
D/W	Diplura	Campodeidae gen2. sp.3	ISLA-UFLA	ISLA 43731	No	0	0	0	0	0	0	0	0	0	0	1	1	0	0	0	0	0	0	0	0	0	0	0	0	0	0	0	0	0	0	0	0	0	0	2	2	0	0	0	0	0	0	0	0
D/W	Diplura	Japygidae gen1. sp.2	ISLA-UFLA	ISLA 43732	No	0	0	0	0	0	0	0	0	0	0	0	0	0	0	0	0	0	0	0	0	0	0	0	0	0	0	0	0	0	0	0	0	0	0	0	0	0	0	0	0	0	0	0	0
D/W	Diplura	Parajapygidae gen1. sp.1	ISLA-UFLA	ISLA 43733	No	3	0	3	0	0	0	0	0	0	0	0	0	0	0	0	0	0	0	0	0	0	0	0	0	0	0	0	0	0	0	0	0	0	0	0	0	0	0	0	0	0	0	0	0
D/W	Diplura	Projapygidae sp.1	ISLA-UFLA	ISLA 43734	No	3	5	8	0	0	0	0	0	0	1	4	5	0	2	2	0	0	0	0	0	0	0	1	1	2	9	11	1	6	7	0	0	0	4	0	4	1	1	2	0	0	0	0	0
D/W	Diplura	Projapygidae sp.2	ISLA-UFLA	ISLA 43735	No	0	0	0	0	0	0	0	0	0	0	4	4	0	1	1	0	0	0	0	0	0	0	0	0	0	0	0	0	0	0	0	0	0	0	1	1	0	0	0	0	0	0	0	0
W	Archaeognatha	Neomachilellus sp.1	ISLA-UFLA	ISLA 43736	No	0	0	0	0	0	0	0	0	0	0	0	0	0	0	0	0	0	0	0	0	0	0	0	0	0	0	0	0	0	0	0	0	0	0	0	0	0	1	1	0	0	0	0	0
W	Zygentoma	cf. Ctenolepisma sp.1	ISLA-UFLA	ISLA 43737	No	0	0	0	0	0	0	0	0	0	0	0	0	0	0	0	0	0	0	0	0	0	0	0	0	0	0	0	0	0	0	0	0	0	0	0	0	0	0	0	0	0	0	0	0
D/W	Zygentoma	Atelurinae gen.1 sp.1	ISLA-UFLA	ISLA 43738	No	0	0	0	0	0	0	2	3	5	1	0	1	0	0	0	0	0	0	0	0	0	0	0	0	0	0	0	0	0	0	0	0	0	0	0	0	0	0	0	0	0	0	0	0
D	Zygentoma	Atelurinae gen.1 sp.2	ISLA-UFLA	ISLA 43739	No	0	0	0	0	0	0	0	0	0	0	0	0	0	0	0	0	0	0	0	0	0	0	0	0	0	0	0	0	0	0	0	0	0	0	0	0	0	0	0	0	0	0	0	0
W	Zygentoma	Atelurinae gen.1 sp.3	ISLA-UFLA	ISLA 43740	No	0	0	0	0	0	0	0	2	2	0	0	0	0	0	0	0	0	0	0	0	0	0	0	0	0	0	0	0	0	0	0	0	0	0	0	0	0	0	0	0	0	0	0	0
D/W	Zygentoma	Nicoletiinae gen.1 sp.1	ISLA-UFLA	ISLA 43741	No	0	1	1	0	0	0	1	2	3	7	3	10	0	1	1	1	0	1	0	0	0	0	0	0	1	3	4	1	0	1	2	3	5	0	0	0	0	0	0	0	0	0	0	0
D/W	Zygentoma	Nicoletiinae gen.1 sp.2	ISLA-UFLA	ISLA 43742	No	0	0	0	0	0	0	0	0	0	0	0	0	0	0	0	0	0	0	0	0	0	0	0	0	0	0	0	0	0	0	0	4	4	0	0	0	0	0	0	0	0	0	0	0
D	Zygentoma	Nicoletiinae gen.1 sp.3	ISLA-UFLA	ISLA 43743	No	0	0	0	0	0	0	0	0	0	0	0	0	0	0	0	0	0	0	0	0	0	0	0	0	0	0	0	0	0	0	0	0	0	0	0	0	0	0	0	0	0	0	0	0
W	Orthoptera	Anostostomatidae sp.1	ISLA-UFLA	ISLA 43744	No	0	0	0	0	0	0	0	0	0	0	0	0	0	0	0	0	0	0	0	0	0	0	0	0	0	0	0	0	0	0	0	0	0	0	0	0	0	0	0	0	0	0	0	0
D	Orthoptera	Gryllacrididae sp.2	ISLA-UFLA	ISLA 43745	No	0	0	0	0	0	0	0	0	0	0	0	0	0	0	0	0	0	0	0	0	0	0	0	0	0	0	0	0	0	0	0	0	0	0	0	0	1	0	1	0	0	0	0	0
D/W	Orthoptera	Gryllidae sp.1	ISLA-UFLA	ISLA 43746	No	0	0	0	0	0	0	0	0	0	0	0	0	0	0	0	0	0	0	0	0	0	0	0	0	1	7	8	0	0	0	0	0	0	0	5	5	0	0	0	0	0	0	0	0
D/W	Orthoptera	Mogoplistidae sp.2	ISLA-UFLA	ISLA 43747	No	0	0	0	0	0	0	0	0	0	0	0	0	0	0	0	0	0	0	0	0	0	0	0	0	0	0	0	0	0	0	0	0	0	0	0	0	0	0	0	0	0	0	0	0
D/W	Orthoptera	Luzarinae sp.1	ISLA-UFLA	ISLA 43748	No	0	0	0	0	0	0	0	0	0	0	0	0	0	0	0	0	0	0	0	0	0	0	0	0	0	0	0	0	0	0	0	0	0	0	0	0	0	0	0	0	0	0	0	0
W	Orthoptera	Luzarinae sp.2	ISLA-UFLA	ISLA 43749	No	0	0	0	0	0	0	0	0	0	0	0	0	0	0	0	0	0	0	0	0	0	0	0	0	0	0	0	0	0	0	0	0	0	0	0	0	0	0	0	0	0	0	0	0
D/W	Orthoptera	Phalangopsidae immature	-	-	No	15	0	15	0	0	0	0	0	0	5	0	5	0	0	0	0	0	0	0	0	0	4	0	4	0	0	0	1	0	1	0	0	0	0	0	0	2	3	5	22	0	22	0	0
W	Orthoptera	Phalangopsidae sp.12	ISLA-UFLA	ISLA 43750	No	0	0	0	0	0	0	0	0	0	0	0	0	0	0	0	0	0	0	0	0	0	0	0	0	0	0	0	0	0	0	0	0	0	0	0	0	0	0	0	0	0	0	0	0
W	Orthoptera	Phalangopsidae sp.13	ISLA-UFLA	ISLA 43751	No	0	0	0	0	0	0	0	0	0	0	0	0	0	0	0	0	0	0	0	0	0	0	0	0	0	0	0	0	0	0	0	0	0	0	0	0	0	0	0	0	0	0	0	0
D	Orthoptera	Phalangopsidae sp.14	ISLA-UFLA	ISLA 43752	No	0	0	0	0	0	0	0	0	0	0	0	0	0	0	0	0	0	0	0	0	0	0	0	0	0	0	0	0	0	0	0	0	0	0	0	0	0	0	0	0	0	0	0	0
D/W	Orthoptera	Phalangopsidae sp.8	ISLA-UFLA	ISLA 43753	No	0	0	0	0	0	0	0	0	0	0	0	0	0	0	0	0	0	0	0	0	0	0	0	0	0	0	0	0	0	0	0	0	0	0	0	0	0	0	0	0	0	0	0	0
W	Orthoptera	Phalangopsidae sp.9	ISLA-UFLA	ISLA 43754	No	0	0	0	0	0	0	0	0	0	0	0	0	0	0	0	0	0	0	0	0	0	0	1	1	0	0	0	0	0	0	0	0	0	0	0	0	0	0	0	0	0	0	0	0
D/W	Orthoptera	Phalangopsis sp.1	ISLA-UFLA	ISLA 43755	No	22	64	86	4	9	13	234	204	438	15	4	19	92	31	123	0	7	7	0	0	0	0	4	4	0	3	3	13	15	28	181	89	270	6	1	7	0	10	10	0	0	0	3	8
D/W	Orthoptera	Uvaroviella sp.1	ISLA-UFLA	ISLA 43756	No	0	0	0	0	0	0	0	0	0	0	0	0	5	0	5	0	0	0	0	0	0	0	0	0	0	0	0	0	0	0	0	0	0	0	0	0	0	0	0	0	0	0	0	0
D/W	Blattaria	Blattaria immature	-	-	No	7	1	8	0	0	0	0	0	0	10	2	12	1	0	1	0	0	0	1	0	1	0	0	0	0	0	0	3	0	3	0	0	0	0	0	0	8	0	8	0	0	0	0	0
D/W	Blattaria	Isoptera operário	-	-	No	0	0	0	0	0	0	0	0	0	0	0	0	0	0	0	0	0	0	0	0	0	1	0	1	0	0	0	0	0	0	0	0	0	0	0	0	0	0	0	0	0	0	0	0
D/W	Blattaria	cf. Tribonium sp.1	ISLA-UFLA	ISLA 43757	No	0	0	0	0	0	0	0	0	0	0	0	0	0	0	0	0	0	0	0	0	0	0	0	0	0	0	0	0	0	0	0	0	0	0	0	0	0	0	0	0	0	0	0	0
D/W	Blattaria	Blaberinae immature	-	-	No	0	0	0	0	0	0	0	0	0	0	0	0	2	6	8	2	5	7	0	0	0	0	0	0	0	4	4	2	2	4	0	0	0	0	0	0	0	0	0	0	0	0	0	0
D/W	Blattaria	Blattellinae gen.1 sp.1	ISLA-UFLA	ISLA 43758	No	0	0	0	0	0	0	0	0	0	0	0	0	1	0	1	1	1	2	0	0	0	0	0	0	0	0	0	0	0	0	0	0	0	0	0	0	0	0	0	0	0	0	0	0
D/W	Blattaria	Blattellinae gen.2 sp.1	ISLA-UFLA	ISLA 43759	No	0	2	2	0	0	0	1	6	7	0	0	0	0	0	0	0	0	0	0	0	0	0	2	2	0	0	0	0	0	0	0	0	0	0	0	0	0	1	1	0	0	0	0	0
D/W	Blattaria	Blattellinae gen.3 sp.1	ISLA-UFLA	ISLA 43760	No	0	0	0	2	0	2	0	0	0	0	0	0	0	0	0	0	0	0	0	0	0	0	0	0	0	0	0	0	0	0	0	0	0	0	0	0	0	0	0	0	0	0	0	0
W	Blattaria	Blattellinae gen.4 sp.1	ISLA-UFLA	ISLA 43761	No	0	0	0	0	0	0	0	0	0	0	0	0	0	0	0	0	0	0	0	0	0	0	0	0	0	0	0	0	0	0	0	0	0	0	0	0	0	0	0	0	0	0	0	0
D	Blattaria	Blattellinae gen.4 sp.2	ISLA-UFLA	ISLA 43762	No	0	0	0	0	0	0	0	0	0	0	0	0	0	0	0	0	0	0	0	0	0	0	0	0	0	0	0	0	0	0	0	0	0	0	0	0	0	0	0	0	0	0	0	0
W	Blattaria	Blattellinae gen.4 sp.6	ISLA-UFLA	ISLA 43763	No	0	0	0	0	0	0	0	0	0	0	0	0	0	0	0	0	0	0	0	0	0	0	0	0	0	0	0	0	0	0	0	1	1	0	0	0	0	0	0	0	0	0	0	0
D/W	Blattaria	Blattellinae immature	-	-	No	0	0	0	0	0	0	0	0	0	1	0	1	0	0	0	19	1	20	0	0	0	0	0	0	0	0	0	0	0	0	0	0	0	0	0	0	0	1	1	0	0	0	0	0
D/W	Blattaria	Holocompsinae gen.1 sp.1	ISLA-UFLA	ISLA 43764	No	0	0	0	0	0	0	0	0	0	0	0	0	0	0	0	0	0	0	0	0	0	0	0	0	0	0	0	0	0	0	0	0	0	0	0	0	0	0	0	0	0	0	0	0
D	Blattaria	Polyphagidae gen.1 sp.1	ISLA-UFLA	ISLA 43765	No	0	0	0	0	0	0	0	0	0	0	0	0	0	0	0	0	0	0	1	0	1	0	0	0	0	0	0	0	0	0	0	0	0	0	0	0	0	0	0	0	0	0	0	0
D	Blattaria	Polyphagidae gen.1 sp.2	ISLA-UFLA	ISLA 43766	No	0	0	0	0	0	0	0	0	0	0	0	0	0	0	0	0	0	0	0	0	0	0	0	0	0	0	0	0	0	0	0	0	0	0	0	0	0	0	0	0	0	0	0	0
D/W	Blattaria	Polyphagidae immature	-	-	No	0	0	0	0	1	1	4	2	6	0	0	0	0	0	0	0	0	0	0	0	0	0	0	0	0	0	0	0	0	0	0	0	0	0	0	0	0	6	6	0	0	0	3	0
D	Blattaria	Euphyllodromia sp.1	ISLA-UFLA	ISLA 43767	No	0	0	0	0	0	0	0	0	0	0	0	0	0	0	0	0	0	0	0	0	0	0	0	0	0	0	0	0	0	0	0	0	0	0	0	0	0	0	0	0	0	0	0	0
D/W	Blattaria	Coptotermes sp.1	ISLA-UFLA	ISLA 43768	No	0	0	0	0	0	0	0	0	0	0	0	0	0	0	0	0	0	0	0	0	0	0	0	0	0	0	0	0	0	0	0	0	0	0	0	0	0	0	0	0	0	0	0	0
D/W	Blattaria	Heterotermes sp.1	ISLA-UFLA	ISLA 43769	No	0	0	0	0	0	0	0	0	0	0	0	0	0	0	0	0	0	0	0	0	0	0	0	0	0	0	0	0	0	0	0	0	0	0	0	0	0	0	0	0	0	0	0	0
W	Blattaria	Agnathotermes sp.1	ISLA-UFLA	ISLA 43770	No	0	0	0	0	0	0	0	0	0	0	0	0	0	0	0	0	0	0	0	0	0	0	0	0	0	0	0	0	0	0	0	0	0	0	0	0	0	0	0	0	0	0	0	0
D/W	Blattaria	Anoplotermes sp.1	ISLA-UFLA	ISLA 43771	No	0	0	0	0	0	0	0	0	0	0	0	0	0	0	0	0	0	0	0	0	0	0	0	0	0	0	0	0	0	0	0	0	0	0	0	0	0	0	0	0	0	0	0	0
W	Blattaria	Aparatermes sp.1	ISLA-UFLA	ISLA 43772	No	0	0	0	0	0	0	0	0	0	0	0	0	0	0	0	0	0	0	0	0	0	0	0	0	0	0	0	0	0	0	0	0	0	0	0	0	0	0	0	0	0	0	0	0
D/W	Blattaria	Armitermes sp.1	ISLA-UFLA	ISLA 43773	No	0	0	0	0	0	0	0	0	0	0	0	0	0	0	0	0	0	0	0	0	0	0	10	10	0	0	0	0	0	0	0	0	0	0	4	4	0	0	0	0	0	0	0	0
D	Blattaria	Armitermes sp.2	ISLA-UFLA	ISLA 43774	No	0	0	0	0	0	0	0	0	0	0	0	0	0	0	0	0	0	0	10	0	10	0	0	0	0	0	0	0	0	0	0	0	0	0	0	0	0	0	0	0	0	0	0	0
D/W	Blattaria	Armitermes sp.3	ISLA-UFLA	ISLA 43775	No	11	0	11	0	0	0	0	0	0	0	0	0	0	0	0	0	0	0	0	0	0	0	0	0	0	0	0	0	0	0	0	0	0	0	0	0	0	0	0	0	0	0	0	0
D/W	Blattaria	Atlantitermes sp.1	ISLA-UFLA	ISLA 43776	No	0	0	0	0	0	0	0	0	0	0	0	0	0	0	0	0	0	0	0	0	0	0	20	20	0	0	0	0	0	0	0	0	0	0	0	0	0	0	0	0	0	0	0	0
D	Blattaria	Atlantitermes sp.2	ISLA-UFLA	ISLA 43777	No	0	0	0	0	0	0	0	0	0	0	0	0	1	0	1	0	0	0	0	0	0	0	0	0	0	0	0	0	0	0	0	0	0	0	0	0	0	0	0	0	0	0	0	0
D	Blattaria	Convexitermes sp.1	ISLA-UFLA	ISLA 43778	No	0	0	0	0	0	0	0	0	0	0	0	0	0	0	0	0	0	0	0	0	0	0	0	0	0	0	0	0	0	0	0	0	0	0	0	0	0	0	0	0	0	0	0	0
W	Blattaria	Dihoplotermes sp.1	ISLA-UFLA	ISLA 43779	No	0	0	0	0	0	0	0	0	0	0	0	0	0	0	0	0	0	0	0	0	0	0	0	0	0	0	0	0	0	0	0	0	0	0	0	0	0	0	0	0	0	0	0	0
D	Blattaria	Embiratermes sp.1	ISLA-UFLA	ISLA 43780	No	0	0	0	0	0	0	0	0	0	0	0	0	0	0	0	0	0	0	0	0	0	0	0	0	0	0	0	0	0	0	0	0	0	0	0	0	0	0	0	0	0	0	0	0
W	Blattaria	Grigiotermes sp.1	ISLA-UFLA	ISLA 43781	No	0	0	0	0	0	0	0	0	0	0	0	0	0	0	0	0	0	0	0	0	0	0	0	0	0	0	0	0	0	0	0	0	0	0	0	0	0	0	0	0	0	0	0	0
D	Blattaria	Labiotermes sp.1	ISLA-UFLA	ISLA 43782	No	0	0	0	0	0	0	0	0	0	0	0	0	0	0	0	0	0	0	0	0	0	0	0	0	0	0	0	0	0	0	0	0	0	0	0	0	0	0	0	0	0	0	0	0
D/W	Blattaria	Nasutitermes sp.1	ISLA-UFLA	ISLA 43783	No	0	150	150	30	0	30	351	804	1155	370	180	550	1	75	76	440	110	550	0	0	0	0	0	0	630	40	670	0	0	0	3129	50	3179	0	0	0	88	50	138	17	80	97	0	0
D	Blattaria	Nasutitermes sp.2	ISLA-UFLA	ISLA 43784	No	0	0	0	0	0	0	0	0	0	0	0	0	0	0	0	0	0	0	0	0	0	0	0	0	0	0	0	0	0	0	0	0	0	0	0	0	0	0	0	0	0	0	0	0
W	Blattaria	Syntermes sp.1	ISLA-UFLA	ISLA 43785	No	0	0	0	0	0	0	0	0	0	0	0	0	0	0	0	0	0	0	0	0	0	0	0	0	0	0	0	0	0	0	0	0	0	0	0	0	0	0	0	0	0	0	0	0
D/W	Blattaria	Termes sp.1	ISLA-UFLA	ISLA 43786	No	0	0	0	0	0	0	0	6	6	0	0	0	0	0	0	0	0	0	0	0	0	0	0	0	0	0	0	0	0	0	0	0	0	0	0	0	0	0	0	0	0	0	0	0
D/W	Psocoptera	Psocoptera immature	-	-	No	1	0	1	0	0	0	2	11	13	0	5	5	0	0	0	0	0	0	0	5	5	1	3	4	0	2	2	4	1	5	0	0	0	2	5	7	3	6	9	0	1	1	2	0
D	Psocoptera	Amphientomidae gen2. sp.1	ISLA-UFLA	ISLA 43787	No	0	0	0	0	0	0	0	0	0	0	0	0	0	0	0	0	0	0	0	0	0	0	0	0	0	0	0	0	0	0	0	0	0	0	0	0	0	0	0	0	0	0	0	0
W	Psocoptera	Epipsocidae gen1. sp.1	ISLA-UFLA	ISLA 43788	No	0	0	0	0	0	0	0	0	0	0	1	1	0	0	0	0	0	0	0	0	0	0	0	0	0	0	0	0	0	0	0	0	0	0	0	0	0	0	0	0	0	0	0	1
D	Psocoptera	Epipsocidae gen1. sp.2	ISLA-UFLA	ISLA 43789	No	0	0	0	0	0	0	0	0	0	0	0	0	0	0	0	0	0	0	0	0	0	0	0	0	0	0	0	0	0	0	0	0	0	0	0	0	0	0	0	0	0	0	0	0
D/W	Psocoptera	Lepidopsocidae sp.1	ISLA-UFLA	ISLA 43790	No	0	0	0	0	0	0	0	0	0	0	0	0	0	0	0	0	0	0	0	0	0	0	0	0	0	0	0	0	0	0	0	0	0	0	0	0	0	0	0	0	0	0	0	0
D/W	Psocoptera	Liposcelididae gen1. sp.1	ISLA-UFLA	ISLA 43791	No	0	0	0	0	0	0	0	0	0	0	0	0	0	0	0	0	0	0	0	0	0	0	0	0	0	0	0	0	0	0	0	0	0	0	0	0	0	0	0	0	0	0	0	0
W	Psocoptera	Psyllipsocidae gen1. sp.1	ISLA-UFLA	ISLA 43792	No	0	0	0	0	0	0	0	0	0	0	0	0	0	0	0	0	0	0	0	0	0	0	0	0	0	0	0	0	0	0	0	0	0	0	0	0	0	0	0	0	0	0	0	0
D/W	Psocoptera	Psyllipsocidae gen1. sp.2	ISLA-UFLA	ISLA 43793	No	0	0	0	0	0	0	0	0	0	0	0	0	0	0	0	0	1	1	0	0	0	0	0	0	0	0	0	0	0	0	0	0	0	0	0	0	1	0	1	0	0	0	0	0
W	Psocoptera	Psyllipsocidae gen1. sp.3	ISLA-UFLA	ISLA 43794	No	0	0	0	0	0	0	0	0	0	0	0	0	0	0	0	0	0	0	0	0	0	0	0	0	0	0	0	0	0	0	0	0	0	0	0	0	0	0	0	0	0	0	0	0
W	Psocoptera	Psyllipsocidae gen1. sp.4	ISLA-UFLA	ISLA 43795	No	0	0	0	0	0	0	0	0	0	0	0	0	0	0	0	0	0	0	0	0	0	0	0	0	0	0	0	0	0	0	0	0	0	0	0	0	0	0	0	0	0	0	0	0
W	Psocoptera	Ptiloneura sp.1	ISLA-UFLA	ISLA 43796	No	0	0	0	0	0	0	0	0	0	0	0	0	0	0	0	0	0	0	0	0	0	0	0	0	0	0	0	0	0	0	0	0	0	0	0	0	0	1	1	0	0	0	0	0
D/W	Hemiptera	Achilidae immature	-	-	No	0	0	0	0	0	0	0	0	0	0	0	0	0	0	0	0	0	0	0	0	0	0	0	0	0	0	0	0	0	0	0	0	0	0	0	0	0	0	0	0	0	0	0	0
W	Hemiptera	Cixidia sp.1	ISLA-UFLA	ISLA 43797	No	0	0	0	0	0	0	0	0	0	0	0	0	0	0	0	0	0	0	0	0	0	0	0	0	0	0	0	0	0	0	0	0	0	0	0	0	0	0	0	0	0	0	0	0
W	Hemiptera	Cixidia sp.2	ISLA-UFLA	ISLA 43798	No	0	0	0	0	0	0	0	0	0	0	0	0	0	0	0	0	0	0	0	0	0	0	0	0	0	0	0	0	0	0	0	0	0	0	0	0	0	0	0	0	0	0	0	0
W	Hemiptera	Alydidae immature	-	-	No	0	0	0	0	0	0	0	0	0	0	0	0	0	0	0	0	0	0	0	0	0	0	0	0	0	0	0	0	0	0	0	0	0	0	0	0	0	0	0	0	1	1	0	0
D/W	Hemiptera	Alydidae sp.1	ISLA-UFLA	ISLA 43799	No	0	0	0	0	0	0	0	0	0	0	1	1	0	0	0	0	1	1	1	1	2	0	0	0	0	0	0	0	0	0	0	0	0	0	0	0	0	0	0	0	0	0	0	0
W	Hemiptera	Ceratocombidae sp.2	ISLA-UFLA	ISLA 43800	No	0	0	0	0	0	0	0	2	2	0	0	0	0	0	0	0	0	0	0	0	0	0	0	0	0	0	0	0	0	0	0	0	0	0	0	0	0	0	0	0	0	0	0	0
W	Hemiptera	Cercopidae immature	-	-	No	0	0	0	0	0	0	0	0	0	0	0	0	0	0	0	0	0	0	0	0	0	0	0	0	0	0	0	0	0	0	0	0	0	0	0	0	0	0	0	0	0	0	0	0
W	Hemiptera	Cercopidae sp.1	ISLA-UFLA	ISLA 43801	No	0	0	0	0	0	0	0	0	0	0	0	0	0	0	0	0	0	0	0	0	0	0	0	0	0	0	0	0	0	0	0	0	0	0	0	0	0	0	0	0	0	0	0	0
D	Hemiptera	Eualebra sp.4	ISLA-UFLA	ISLA 43802	No	0	0	0	0	0	0	0	0	0	0	0	0	0	0	0	0	0	0	0	0	0	0	0	0	0	0	0	0	0	0	0	0	0	0	0	0	0	0	0	0	0	0	0	0
D/W	Hemiptera	Cixiidae immature	-	-	No	101	6	107	3	1	4	147	141	288	0	1	1	24	7	31	0	0	0	0	0	0	0	0	0	4	2	6	3	22	25	64	36	100	13	7	20	0	2	2	7	2	9	0	0
D	Hemiptera	Cixius sp.1	ISLA-UFLA	ISLA 43803	No	0	0	0	0	0	0	0	0	0	0	0	0	0	0	0	0	0	0	0	0	0	0	0	0	0	0	0	0	0	0	0	0	0	0	0	0	0	0	0	0	0	0	0	0
D	Hemiptera	Pintalia sp.1	ISLA-UFLA	ISLA 43804	No	0	0	0	0	0	0	0	0	0	0	0	0	0	0	0	12	0	12	0	0	0	0	0	0	0	0	0	0	0	0	0	0	0	2	0	2	0	0	0	2	0	2	0	0
D/W	Hemiptera	Pintalia sp.2	ISLA-UFLA	ISLA 43805	No	0	2	2	0	0	0	1	3	4	0	0	0	1	0	1	0	0	0	0	0	0	0	0	0	0	0	0	0	2	2	0	0	0	0	0	0	0	0	0	0	1	1	0	0
W	Hemiptera	Coccidae sp.1	ISLA-UFLA	ISLA 43806	No	0	0	0	0	0	0	0	0	0	0	0	0	0	0	0	0	0	0	0	0	0	0	0	0	0	0	0	0	0	0	0	0	0	0	0	0	0	0	0	0	0	0	0	0
D/W	Hemiptera	Cydnidae immature	-	-	No	0	1	1	0	0	0	0	0	0	0	0	0	0	0	0	0	0	0	0	0	0	0	0	0	0	0	0	0	0	0	2	10	12	0	0	0	0	0	0	0	0	0	0	0
D/W	Hemiptera	Cydnidae sp.1	ISLA-UFLA	ISLA 43807	No	0	5	5	0	0	0	0	1	1	0	0	0	0	0	0	0	0	0	0	0	0	0	1	1	0	0	0	0	0	0	1	11	12	0	0	0	0	0	0	0	0	0	0	0
D	Hemiptera	Delphacidae immature	-	-	No	0	0	0	0	0	0	0	0	0	0	0	0	0	0	0	0	0	0	0	0	0	0	0	0	0	0	0	1	0	1	0	0	0	0	0	0	0	0	0	1	0	1	0	0
W	Hemiptera	Derbidae gen.3 sp.1	ISLA-UFLA	ISLA 43808	No	0	0	0	0	0	0	0	0	0	0	0	0	0	0	0	0	1	1	0	0	0	0	0	0	0	0	0	0	0	0	0	0	0	0	0	0	0	0	0	0	8	8	0	0
D	Hemiptera	Dictyopharidae sp.1	ISLA-UFLA	ISLA 43809	No	0	0	0	0	0	0	0	0	0	0	0	0	0	0	0	0	0	0	0	0	0	0	0	0	0	0	0	0	0	0	0	0	0	0	0	0	0	0	0	0	0	0	0	0
W	Hemiptera	Hebridae immature	-	-	No	0	0	0	0	0	0	0	0	0	0	0	0	0	0	0	0	0	0	0	0	0	0	0	0	0	0	0	0	0	0	0	0	0	0	0	0	0	0	0	0	0	0	0	0
D/W	Hemiptera	Lygaeidae immature	-	-	No	1	0	1	1	0	1	0	0	0	0	0	0	0	0	0	0	0	0	0	0	0	0	0	0	0	0	0	0	0	0	0	10	10	0	0	0	0	0	0	0	0	0	0	0
W	Hemiptera	Lygaeidae sp.2	ISLA-UFLA	ISLA 43810	No	0	0	0	0	0	0	0	0	0	0	0	0	0	0	0	0	0	0	0	1	1	0	0	0	0	0	0	0	0	0	0	0	0	0	0	0	0	0	0	0	0	0	0	0
W	Hemiptera	Lygaeidae sp.3	ISLA-UFLA	ISLA 43811	No	0	0	0	0	0	0	0	0	0	0	0	0	0	0	0	0	0	0	0	0	0	0	1	1	0	0	0	0	0	0	0	0	0	0	0	0	0	1	1	0	0	0	0	0
W	Hemiptera	Lygaeidae sp.4	ISLA-UFLA	ISLA 43812	No	0	0	0	0	0	0	0	0	0	0	0	0	0	0	0	0	0	0	0	0	0	0	0	0	0	0	0	0	0	0	0	0	0	0	0	0	0	0	0	0	0	0	0	0
W	Hemiptera	Lygaeidae sp.6	ISLA-UFLA	ISLA 43813	No	0	0	0	0	0	0	0	0	0	0	0	0	0	0	0	0	0	0	0	0	0	0	0	0	0	0	0	0	0	0	0	0	0	0	0	0	0	0	0	0	0	0	0	0
W	Hemiptera	Ortheziidae sp.1	ISLA-UFLA	ISLA 43814	No	0	0	0	0	0	0	0	0	0	0	0	0	0	2	2	0	0	0	0	0	0	0	0	0	0	0	0	0	0	0	0	0	0	0	0	0	0	0	0	0	0	0	0	0
W	Hemiptera	Pseudococcidae sp.1	ISLA-UFLA	ISLA 43815	No	0	0	0	0	0	0	0	0	0	0	0	0	0	0	0	0	0	0	0	0	0	0	0	0	0	0	0	0	0	0	0	0	0	0	0	0	0	0	0	0	0	0	0	0
W	Hemiptera	Pseudococcidae sp.2	ISLA-UFLA	ISLA 43816	No	0	0	0	0	0	0	0	0	0	0	0	0	0	0	0	0	0	0	0	0	0	0	0	0	0	0	0	0	0	0	0	1	1	0	0	0	0	0	0	0	0	0	0	0
W	Hemiptera	Pseudococcidae sp.4	ISLA-UFLA	ISLA 43817	No	0	0	0	0	0	0	0	0	0	0	0	0	0	0	0	0	0	0	0	0	0	0	27	27	0	0	0	0	0	0	0	0	0	0	0	0	0	0	0	0	0	0	0	0
W	Hemiptera	Pseudococcidae sp.5	ISLA-UFLA	ISLA 43818	No	0	0	0	0	0	0	0	0	0	0	0	0	0	0	0	0	0	0	0	0	0	0	0	0	0	0	0	0	0	0	0	0	0	0	0	0	0	0	0	0	0	0	0	0
D/W	Hemiptera	Emesinae immature	-	-	No	1	0	1	0	0	0	9	2	11	0	0	0	0	0	0	0	0	0	0	0	0	0	0	0	0	0	0	1	0	1	0	1	1	0	0	0	0	0	0	0	0	0	0	0
W	Hemiptera	Emesinae sp.1	ISLA-UFLA	ISLA 43819	No	0	0	0	0	0	0	0	0	0	0	0	0	0	0	0	0	0	0	0	0	0	0	0	0	0	0	0	0	0	0	0	0	0	0	0	0	0	0	0	0	0	0	0	0
D/W	Hemiptera	Emesinae sp.3	ISLA-UFLA	ISLA 43820	No	0	0	0	0	0	0	0	0	0	0	0	0	2	1	3	0	0	0	0	0	0	0	0	0	0	0	0	0	0	0	0	0	0	0	0	0	0	0	0	0	0	0	0	0
W	Hemiptera	Emesinae sp.4	ISLA-UFLA	ISLA 43821	No	0	0	0	0	0	0	0	2	2	0	0	0	0	0	0	0	0	0	0	0	0	0	0	0	0	0	0	0	0	0	0	0	0	0	0	0	0	0	0	0	0	0	0	0
W	Hemiptera	Emesinae sp.5	ISLA-UFLA	ISLA 43822	No	0	0	0	0	0	0	0	0	0	0	0	0	0	0	0	0	0	0	0	1	1	0	0	0	0	0	0	0	0	0	0	0	0	0	0	0	0	0	0	0	0	0	0	0
D/W	Hemiptera	Reduviidae immature	-	-	No	2	1	3	3	1	4	15	12	27	2	3	5	5	4	9	1	1	2	10	3	13	0	0	0	10	2	12	2	2	4	0	0	0	0	1	1	3	2	5	0	2	2	0	0
D	Hemiptera	Reduviidae sp.2	ISLA-UFLA	ISLA 43824	No	0	0	0	0	0	0	0	0	0	0	0	0	1	0	1	0	0	0	0	0	0	0	0	0	0	0	0	0	0	0	0	0	0	0	0	0	0	0	0	0	0	0	0	0
W	Hemiptera	Zelurus sp.1	ISLA-UFLA	ISLA 43825	No	0	0	0	0	0	0	0	0	0	0	0	0	0	0	0	0	0	0	0	0	0	0	0	0	0	0	0	0	0	0	0	0	0	0	0	0	0	0	0	0	0	0	0	0
D/W	Hemiptera	Schizopteridae immature	-	-	No	0	0	0	0	0	0	6	14	20	0	0	0	0	0	0	0	0	0	0	0	0	0	0	0	0	0	0	0	1	1	0	0	0	0	0	0	0	0	0	0	0	0	0	0
D/W	Hemiptera	Schizopteridae sp.1	ISLA-UFLA	ISLA 43826	No	0	0	0	0	0	0	0	0	0	0	0	0	0	0	0	0	0	0	0	0	0	0	0	0	0	0	0	0	0	0	0	0	0	0	0	0	0	0	0	0	0	0	0	0
D/W	Hemiptera	Schizopteridae sp.2	ISLA-UFLA	ISLA 43827	No	0	0	0	0	0	0	0	42	42	0	0	0	0	1	1	0	0	0	0	0	0	0	0	0	0	0	0	0	4	4	0	0	0	0	0	0	0	0	0	0	0	0	0	0
D	Hemiptera	Schizopteridae sp.3	ISLA-UFLA	ISLA 43828	No	0	0	0	0	0	0	1	0	1	0	0	0	0	0	0	0	0	0	0	0	0	0	0	0	0	0	0	0	0	0	0	0	0	0	0	0	0	0	0	0	0	0	0	0
D/W	Hemiptera	Schizopteridae sp.4	ISLA-UFLA	ISLA 43829	No	0	0	0	0	0	0	0	0	0	0	0	0	0	0	0	0	0	0	0	0	0	0	0	0	0	0	0	0	0	0	0	0	0	0	0	0	0	0	0	0	0	0	0	0
D/W	Hemiptera	Tingidae immature	-	-	No	0	0	0	0	0	0	1	0	1	0	0	0	0	0	0	0	0	0	0	0	0	0	0	0	0	0	0	0	0	0	0	0	0	0	0	0	0	0	0	0	0	0	0	0
D/W	Hemiptera	Tingidae sp.1	ISLA-UFLA	ISLA 43830	No	0	0	0	0	0	0	0	3	3	0	0	0	0	0	0	0	0	0	0	0	0	0	0	0	0	1	1	0	0	0	0	0	0	0	0	0	0	0	0	0	0	0	0	0
D/W	Hemiptera	Veliidae immature	-	-	No	0	4	4	0	0	0	0	0	0	0	0	0	0	0	0	0	0	0	0	0	0	0	0	0	0	0	0	0	0	0	0	0	0	0	0	0	0	0	0	0	0	0	0	0
D/W	Hemiptera	Veliidae sp.1	ISLA-UFLA	ISLA 43831	No	1	0	1	0	0	0	0	0	0	0	0	0	0	0	0	0	0	0	0	0	0	0	0	0	0	0	0	0	0	0	0	0	0	0	0	0	0	0	0	0	0	0	0	0
D	Hemiptera	Veliidae sp.2	ISLA-UFLA	ISLA 43832	No	0	0	0	0	0	0	0	0	0	0	0	0	0	0	0	0	0	0	0	0	0	0	0	0	0	0	0	0	0	0	0	0	0	0	0	0	0	0	0	0	0	0	0	0
D	Hymenoptera	Apina sp.1	ISLA-UFLA	ISLA 43833	No	0	0	0	0	0	0	0	0	0	0	0	0	0	0	0	0	0	0	0	0	0	0	0	0	0	0	0	0	0	0	0	0	0	0	0	0	0	0	0	0	0	0	0	0
D/W	Hymenoptera	Epyrinae sp.1	ISLA-UFLA	ISLA 43834	No	0	0	0	0	0	0	0	0	0	0	0	0	0	0	0	0	0	0	0	0	0	0	0	0	0	0	0	0	0	0	0	0	0	0	0	0	0	0	0	0	0	0	0	0
D	Hymenoptera	Epyrinae sp.2	ISLA-UFLA	ISLA 43835	No	0	0	0	0	0	0	0	0	0	0	0	0	0	0	0	0	0	0	0	0	0	0	0	0	0	0	0	0	0	0	0	0	0	0	0	0	0	0	0	0	0	0	0	0
D/W	Hymenoptera	Pseudisobrachium sp.3	ISLA-UFLA	ISLA 43836	No	0	0	0	0	0	0	0	0	0	0	0	0	0	0	0	0	0	0	0	0	0	0	0	0	0	0	0	0	0	0	0	0	0	0	0	0	0	0	0	0	0	0	0	0
D/W	Hymenoptera	Pseudisobrachium sp.4	ISLA-UFLA	ISLA 43837	No	0	0	0	0	0	0	1	0	1	0	0	0	0	0	0	0	0	0	0	0	0	0	0	0	0	0	0	0	0	0	0	0	0	0	0	0	0	0	0	0	0	0	0	0
W	Hymenoptera	Braconidae sp.3	ISLA-UFLA	ISLA 43838	No	0	0	0	0	0	0	0	0	0	0	0	0	0	0	0	0	0	0	0	0	0	0	0	0	0	0	0	0	0	0	0	0	0	0	0	0	0	0	0	0	0	0	0	0
W	Hymenoptera	Braconidae sp.4	ISLA-UFLA	ISLA 43839	No	0	0	0	0	0	0	0	0	0	0	0	0	0	0	0	0	0	0	0	0	0	0	1	1	0	0	0	0	0	0	0	0	0	0	0	0	0	0	0	0	0	0	0	0
D/W	Hymenoptera	Braconidae sp.5	ISLA-UFLA	ISLA 43840	No	0	0	0	0	0	0	0	0	0	0	0	0	0	0	0	0	0	0	0	0	0	0	0	0	0	0	0	0	0	0	0	0	0	0	0	0	0	0	0	0	0	0	0	0
W	Hymenoptera	Braconidae sp.6	ISLA-UFLA	ISLA 43841	No	0	0	0	0	0	0	0	0	0	0	0	0	0	0	0	0	0	0	0	0	0	0	0	0	0	0	0	0	0	0	0	0	0	0	0	0	0	0	0	0	0	0	0	0
W	Hymenoptera	Ceraphronidae sp.2	ISLA-UFLA	ISLA 43842	No	0	0	0	0	0	0	0	0	0	0	0	0	0	0	0	0	0	0	0	0	0	0	0	0	0	0	0	0	0	0	0	0	0	0	0	0	0	0	0	0	0	0	0	0
D	Hymenoptera	Hylaeus sp.2	ISLA-UFLA	ISLA 43843	No	0	0	0	0	0	0	0	0	0	0	0	0	0	0	0	0	0	0	0	0	0	0	0	0	0	0	0	0	0	0	0	0	0	0	0	0	0	0	0	0	0	0	0	0
D/W	Hymenoptera	Miscophini sp.1	ISLA-UFLA	ISLA 43844	No	0	0	0	0	0	0	0	0	0	0	0	0	0	0	0	0	0	0	0	0	0	0	0	0	0	0	0	0	0	0	0	0	0	0	0	0	0	0	0	0	0	0	0	0
D/W	Hymenoptera	Diapriidae sp.1	ISLA-UFLA	ISLA 43845	No	0	0	0	0	0	0	0	0	0	0	0	0	0	0	0	0	0	0	1	0	1	0	0	0	0	0	0	0	0	0	0	0	0	0	0	0	0	0	0	0	0	0	0	0
D	Hymenoptera	Eulophidae sp.1	ISLA-UFLA	ISLA 43846	No	0	0	0	0	0	0	0	0	0	0	0	0	0	0	0	0	0	0	0	0	0	0	0	0	0	0	0	0	0	0	0	0	0	0	0	0	0	0	0	0	0	0	0	0
W	Hymenoptera	Eulophidae sp.3	ISLA-UFLA	ISLA 43847	No	0	0	0	0	0	0	0	0	0	0	0	0	0	0	0	0	0	0	0	0	0	0	0	0	0	0	0	0	0	0	0	0	0	0	0	0	0	0	0	0	0	0	0	0
D	Hymenoptera	Eulophidae sp.4	ISLA-UFLA	ISLA 43848	No	0	0	0	0	0	0	0	0	0	0	0	0	0	0	0	0	0	0	0	0	0	0	0	0	0	0	0	0	0	0	0	0	0	0	0	0	0	0	0	0	0	0	0	0
D/W	Hymenoptera	Acromyrmex sp.1	ISLA-UFLA	ISLA 43849	No	0	0	0	0	0	0	0	0	0	0	0	0	1	0	1	0	0	0	0	0	0	0	0	0	0	0	0	0	1	1	1	0	1	0	0	0	0	0	0	0	0	0	0	0
D/W	Hymenoptera	Acropyga sp.1	ISLA-UFLA	ISLA 43850	No	0	0	0	0	0	0	0	0	0	0	0	0	0	0	0	0	0	0	0	0	0	158	290	448	0	0	0	0	0	0	0	0	0	0	0	0	0	0	0	0	0	0	0	0
D	Hymenoptera	Anochetus sp.1	ISLA-UFLA	ISLA 43851	No	0	0	0	0	0	0	0	0	0	0	0	0	0	0	0	0	0	0	0	0	0	0	0	0	0	0	0	0	0	0	0	0	0	0	0	0	0	0	0	0	0	0	0	0
D/W	Hymenoptera	Apterostigma sp.3	ISLA-UFLA	ISLA 43852	No	0	0	0	0	0	0	0	0	0	0	0	0	3	0	3	0	0	0	0	0	0	0	0	0	0	0	0	0	12	12	0	0	0	0	0	0	0	0	0	0	0	0	0	0
D/W	Hymenoptera	Brachymyrmex sp.1	ISLA-UFLA	ISLA 43853	No	0	0	0	0	0	0	0	0	0	0	0	0	0	0	0	0	0	0	0	0	0	0	0	0	0	0	0	0	0	0	0	0	0	0	0	0	0	0	0	0	0	0	0	0
D/W	Hymenoptera	Camponotus sp.2	ISLA-UFLA	ISLA 43854	No	0	0	0	0	0	0	0	0	0	0	0	0	0	0	0	0	0	0	0	1	1	0	0	0	0	0	0	0	0	0	0	0	0	0	0	0	0	0	0	0	0	0	0	0
D/W	Hymenoptera	Camponotus sp.3	ISLA-UFLA	ISLA 43855	No	0	0	0	0	0	0	26	124	150	15	0	15	34	0	34	0	0	0	10	0	10	0	0	0	13	9	22	84	0	84	4	7	11	40	3	43	26	0	26	8	13	21	0	0
D/W	Hymenoptera	Camponotus sp.4	ISLA-UFLA	ISLA 43856	No	0	0	0	0	0	0	0	0	0	0	2	2	35	4	39	45	25	70	0	0	0	0	0	0	1	7	8	0	0	0	2	0	2	0	0	0	0	0	0	0	0	0	0	0
D/W	Hymenoptera	Camponotus sp.6	ISLA-UFLA	ISLA 43857	No	0	0	0	0	0	0	0	0	0	0	0	0	0	0	0	0	0	0	0	0	0	0	0	0	0	0	0	0	0	0	0	0	0	0	0	0	0	0	0	0	0	0	0	0
D	Hymenoptera	Camponotus sp.7	ISLA-UFLA	ISLA 43858	No	0	0	0	0	0	0	0	0	0	0	0	0	0	0	0	3	0	3	0	0	0	0	0	0	0	0	0	0	0	0	0	0	0	0	0	0	0	0	0	0	0	0	0	0
D/W	Hymenoptera	Cardiocondyla sp.1	ISLA-UFLA	ISLA 43859	No	0	0	0	0	0	0	0	0	0	0	1	1	0	0	0	0	0	0	0	0	0	0	0	0	0	0	0	0	0	0	0	0	0	0	0	0	0	0	0	0	0	0	0	0
W	Hymenoptera	Cardiocondyla sp.2	ISLA-UFLA	ISLA 43860	No	0	0	0	0	0	0	0	0	0	0	0	0	0	0	0	0	0	0	0	0	0	0	0	0	0	0	0	0	0	0	0	0	0	0	0	0	0	0	0	0	0	0	0	0
D	Hymenoptera	Carebara sp.1	ISLA-UFLA	ISLA 43861	No	0	0	0	0	0	0	0	0	0	0	0	0	0	0	0	0	0	0	0	0	0	0	0	0	0	0	0	0	0	0	0	0	0	0	0	0	0	0	0	0	0	0	0	0
W	Hymenoptera	Carebara sp.2	ISLA-UFLA	ISLA 43862	No	0	0	0	0	0	0	0	0	0	0	0	0	0	0	0	0	0	0	0	0	0	0	0	0	0	0	0	0	0	0	0	0	0	0	0	0	0	0	0	0	0	0	0	0
D	Hymenoptera	Cephalotes clypeatus	ISLA-UFLA	ISLA 43863	No	0	0	0	0	0	0	0	0	0	0	0	0	0	0	0	0	0	0	0	0	0	0	0	0	0	0	0	0	0	0	0	0	0	0	0	0	0	0	0	0	0	0	0	0
D	Hymenoptera	Cephalotes sp.4	ISLA-UFLA	ISLA 43864	No	0	0	0	0	0	0	0	0	0	0	0	0	0	0	0	0	0	0	0	0	0	0	0	0	0	0	0	0	0	0	0	0	0	0	0	0	0	0	0	0	0	0	0	0
D	Hymenoptera	Cephalotes umbraculatus	ISLA-UFLA	ISLA 43865	No	0	0	0	0	0	0	0	0	0	0	0	0	0	0	0	0	0	0	0	0	0	0	0	0	0	0	0	0	0	0	0	0	0	0	0	0	0	0	0	0	0	0	0	0
D/W	Hymenoptera	Crematogaster sp.1	ISLA-UFLA	ISLA 43866	No	0	0	0	0	0	0	0	0	0	17	0	17	0	0	0	1	0	1	5	0	5	4	0	4	1	2	3	0	0	0	20	0	20	45	15	60	0	0	0	0	0	0	0	0
D	Hymenoptera	Crematogaster sp.2	ISLA-UFLA	ISLA 43867	No	0	0	0	0	0	0	0	0	0	0	0	0	0	0	0	0	0	0	0	0	0	0	0	0	0	0	0	0	0	0	0	0	0	0	0	0	0	0	0	0	0	0	0	0
W	Hymenoptera	Cyphomyrmex sp.2	ISLA-UFLA	ISLA 43868	No	0	0	0	0	0	0	0	0	0	0	0	0	0	0	0	0	0	0	0	0	0	0	0	0	0	0	0	0	0	0	0	0	0	0	0	0	0	0	0	0	0	0	0	1
D/W	Hymenoptera	Dolichoderus sp.1	ISLA-UFLA	ISLA 43869	No	31	0	31	2	50	52	0	0	0	0	0	0	0	0	0	45	150	195	0	0	0	0	5	5	22	0	22	0	0	0	0	0	0	0	0	0	62	20	82	0	0	0	140	45
W	Hymenoptera	Ectatomma sp.2	ISLA-UFLA	ISLA 43870	No	0	0	0	0	0	0	0	0	0	0	0	0	0	0	0	0	0	0	0	0	0	0	0	0	0	0	0	0	0	0	0	0	0	0	0	0	0	1	1	0	0	0	0	0
W	Hymenoptera	Formicidae sp.2	ISLA-UFLA	ISLA 43871	No	0	0	0	0	0	0	0	1	1	0	0	0	0	0	0	0	0	0	0	0	0	0	0	0	0	0	0	0	0	0	0	0	0	0	0	0	0	0	0	0	0	0	0	0
D/W	Hymenoptera	Gnamptogenys sp.1	ISLA-UFLA	ISLA 43872	No	4	0	4	0	0	0	1	2	3	0	0	0	0	0	0	0	0	0	0	0	0	0	0	0	0	0	0	0	0	0	0	0	0	0	0	0	0	0	0	0	0	0	0	0
D/W	Hymenoptera	Gnamptogenys sp.2	ISLA-UFLA	ISLA 43873	No	0	0	0	0	0	0	0	0	0	13	7	20	0	0	0	0	0	0	0	0	0	0	0	0	5	0	5	0	0	0	0	0	0	0	0	0	0	0	0	0	0	0	0	0
W	Hymenoptera	Gnamptogenys sp.4	ISLA-UFLA	ISLA 43874	No	0	0	0	0	0	0	0	0	0	0	0	0	0	0	0	0	0	0	0	0	0	0	0	0	0	0	0	0	0	0	0	0	0	0	0	0	0	0	0	0	0	0	0	0
D/W	Hymenoptera	Hypoponera sp.1	ISLA-UFLA	ISLA 43875	No	0	0	0	0	0	0	0	0	0	0	0	0	0	0	0	0	0	0	0	0	0	0	0	0	0	0	0	0	0	0	0	0	0	0	0	0	0	0	0	0	0	0	0	0
D/W	Hymenoptera	Hypoponera sp.2	ISLA-UFLA	ISLA 43876	No	0	0	0	0	0	0	0	0	0	0	0	0	0	0	0	0	0	0	0	0	0	0	0	0	0	0	0	2	5	7	0	0	0	0	0	0	0	0	0	0	0	0	0	0
D/W	Hymenoptera	Hypoponera sp.3	ISLA-UFLA	ISLA 43877	No	0	0	0	0	0	0	0	0	0	0	0	0	0	0	0	0	0	0	0	0	0	0	0	0	0	0	0	0	0	0	4	2	6	0	0	0	0	0	0	0	0	0	0	0
D	Hymenoptera	Labidus sp.1	ISLA-UFLA	ISLA 43878	No	100	0	100	0	0	0	0	0	0	0	0	0	0	0	0	0	0	0	0	0	0	0	0	0	0	0	0	0	0	0	0	0	0	0	0	0	0	0	0	0	0	0	0	0
D	Hymenoptera	Labidus sp.2	ISLA-UFLA	ISLA 43879	No	0	0	0	0	0	0	0	0	0	0	0	0	0	0	0	0	0	0	0	0	0	0	0	0	0	0	0	0	0	0	0	0	0	0	0	0	0	0	0	0	0	0	0	0
D	Hymenoptera	Linepithema sp.1	ISLA-UFLA	ISLA 43880	No	0	0	0	0	0	0	0	0	0	0	0	0	0	0	0	0	0	0	0	0	0	0	0	0	0	0	0	0	0	0	0	0	0	0	0	0	0	0	0	0	0	0	0	0
D/W	Hymenoptera	Mayaponera sp.1	ISLA-UFLA	ISLA 43881	No	26	2	28	0	0	0	0	0	0	11	0	11	2	2	4	0	0	0	4	3	7	3	0	3	15	0	15	7	5	12	13	3	16	1	6	7	1	0	1	0	0	0	0	0
D	Hymenoptera	Mayaponera sp.4	ISLA-UFLA	ISLA 43882	No	0	0	0	0	0	0	0	0	0	0	0	0	0	0	0	0	0	0	0	0	0	0	0	0	0	0	0	0	0	0	0	0	0	0	0	0	0	0	0	0	0	0	0	0
D	Hymenoptera	Myrmicocrypta sp.1	ISLA-UFLA	ISLA 43883	No	0	0	0	0	0	0	0	0	0	0	0	0	4	0	4	0	0	0	0	0	0	0	0	0	0	0	0	0	0	0	1	0	1	0	0	0	0	0	0	0	0	0	0	0
D	Hymenoptera	Neivamyrmex sp.1	ISLA-UFLA	ISLA 43884	No	0	0	0	0	0	0	0	0	0	0	0	0	0	0	0	0	0	0	0	0	0	0	0	0	0	0	0	0	0	0	0	0	0	0	0	0	0	0	0	0	0	0	0	0
D/W	Hymenoptera	Neoponera sp.1	ISLA-UFLA	ISLA 43885	No	0	0	0	0	0	0	0	0	0	0	0	0	0	0	0	0	0	0	0	0	0	0	0	0	0	0	0	0	0	0	0	0	0	0	1	1	0	0	0	0	0	0	0	0
W	Hymenoptera	Ochetomyrmex neopolitus	ISLA-UFLA	ISLA 43886	No	0	0	0	0	0	0	0	0	0	0	0	0	0	0	0	0	0	0	0	0	0	0	0	0	0	0	0	0	0	0	0	0	0	0	0	0	0	0	0	0	0	0	0	0
D/W	Hymenoptera	Octostruma sp.1	ISLA-UFLA	ISLA 43887	No	0	0	0	0	0	0	0	0	0	0	0	0	0	0	0	0	0	0	0	0	0	0	0	0	0	0	0	0	1	1	0	0	0	0	1	1	0	0	0	0	0	0	0	0
D/W	Hymenoptera	Odontomachus sp.1	ISLA-UFLA	ISLA 43888	No	0	0	0	0	0	0	0	3	3	0	0	0	0	0	0	0	0	0	0	0	0	0	0	0	0	0	0	0	0	0	0	1	1	0	0	0	0	0	0	0	0	0	0	0
D/W	Hymenoptera	Pachycondyla sp.1	ISLA-UFLA	ISLA 43889	No	0	0	0	0	0	0	0	1	1	1	0	1	1	0	1	0	0	0	0	0	0	0	0	0	1	0	1	0	0	0	0	3	3	0	0	0	0	0	0	0	0	0	0	0
D/W	Hymenoptera	Pachycondyla sp.2	ISLA-UFLA	ISLA 43890	No	0	0	0	0	0	0	0	0	0	0	0	0	0	0	0	0	0	0	0	0	0	0	0	0	0	0	0	0	0	0	0	0	0	1	1	2	0	0	0	0	0	0	0	0
D/W	Hymenoptera	Paratrechina sp.1	ISLA-UFLA	ISLA 43891	No	0	0	0	0	0	0	0	0	0	0	0	0	0	0	0	0	0	0	0	0	0	0	0	0	0	0	0	0	0	0	0	0	0	32	1	33	0	0	0	0	0	0	0	0
D/W	Hymenoptera	Paratrechina sp.2	ISLA-UFLA	ISLA 43892	No	0	51	51	3	2	5	134	341	475	0	0	0	0	0	0	0	0	0	0	0	0	0	0	0	0	3	3	0	0	0	24	35	59	0	0	0	1	1	2	1	1	2	0	0
D	Hymenoptera	Pheidole sp.1	ISLA-UFLA	ISLA 43893	No	0	0	0	0	0	0	0	0	0	0	0	0	0	0	0	0	0	0	0	0	0	0	0	0	0	0	0	0	0	0	0	0	0	0	0	0	0	0	0	0	0	0	0	0
D	Hymenoptera	Pheidole sp.11	ISLA-UFLA	ISLA 43894	No	0	0	0	0	0	0	0	0	0	0	0	0	0	0	0	0	0	0	0	0	0	0	0	0	0	0	0	0	0	0	0	0	0	0	0	0	0	0	0	0	0	0	0	0
W	Hymenoptera	Pheidole sp.13	ISLA-UFLA	ISLA 43895	No	0	0	0	0	0	0	0	0	0	0	0	0	0	0	0	0	0	0	0	0	0	0	0	0	0	0	0	0	0	0	0	0	0	0	0	0	0	0	0	0	0	0	0	0
D/W	Hymenoptera	Pheidole sp.2	ISLA-UFLA	ISLA 43896	No	0	0	0	0	0	0	0	0	0	0	0	0	0	0	0	0	0	0	2	6	8	0	0	0	0	0	0	0	0	0	0	0	0	0	0	0	0	0	0	0	0	0	0	0
W	Hymenoptera	Pheidole sp.4	ISLA-UFLA	ISLA 43897	No	0	0	0	0	0	0	0	0	0	0	0	0	0	0	0	0	0	0	0	0	0	0	0	0	0	0	0	0	0	0	0	0	0	0	0	0	0	0	0	0	0	0	0	0
D/W	Hymenoptera	Pheidole sp.6	ISLA-UFLA	ISLA 43898	No	0	0	0	0	0	0	0	0	0	52	5	57	0	0	0	0	0	0	0	0	0	3	0	3	0	0	0	0	0	0	0	0	0	0	0	0	0	0	0	0	0	0	0	0
D/W	Hymenoptera	Pheidole sp.9	ISLA-UFLA	ISLA 43899	No	0	0	0	0	0	0	0	0	0	0	0	0	0	0	0	0	0	0	0	0	0	0	0	0	0	0	0	0	0	0	0	0	0	0	0	0	0	0	0	0	0	0	0	0
D	Hymenoptera	Ponerinae sp.2	ISLA-UFLA	ISLA 43900	No	0	0	0	0	0	0	0	0	0	0	0	0	0	0	0	0	0	0	0	0	0	0	0	0	0	0	0	0	0	0	0	0	0	0	0	0	0	0	0	0	0	0	0	0
W	Hymenoptera	Procryptocerus sp.1	ISLA-UFLA	ISLA 43901	No	0	0	0	0	0	0	0	0	0	0	0	0	0	0	0	0	0	0	0	0	0	0	0	0	0	0	0	0	0	0	0	0	0	0	0	0	0	0	0	0	0	0	0	0
D/W	Hymenoptera	Rogeria sp.2	ISLA-UFLA	ISLA 43902	No	0	0	0	0	3	3	0	0	0	0	0	0	2	0	2	0	0	0	0	0	0	0	0	0	0	0	0	0	0	0	0	0	0	0	0	0	0	0	0	0	0	0	0	0
D/W	Hymenoptera	Rogeria sp.3	ISLA-UFLA	ISLA 43903	No	0	0	0	0	0	0	0	0	0	0	0	0	0	0	0	0	0	0	0	0	0	0	0	0	0	0	0	0	0	0	2	5	7	0	0	0	0	0	0	0	0	0	0	0
W	Hymenoptera	Rogeria sp.4	ISLA-UFLA	ISLA 43904	No	0	0	0	0	0	0	0	0	0	0	0	0	0	0	0	0	0	0	0	0	0	0	0	0	0	0	0	0	0	0	0	0	0	0	0	0	0	0	0	0	0	0	0	0
D/W	Hymenoptera	Solenopsis sp.2	ISLA-UFLA	ISLA 43905	No	0	0	0	0	0	0	0	0	0	1	0	1	1	0	1	0	0	0	0	0	0	0	0	0	0	0	0	0	0	0	0	0	0	0	0	0	2	0	2	0	0	0	0	0
D/W	Hymenoptera	Solenopsis sp.3	ISLA-UFLA	ISLA 43906	No	0	0	0	0	0	0	1	1	2	0	0	0	0	0	0	0	0	0	0	0	0	0	0	0	0	0	0	0	0	0	0	0	0	0	0	0	0	0	0	0	0	0	0	0
D/W	Hymenoptera	Solenopsis sp.5	ISLA-UFLA	ISLA 43907	No	0	0	0	0	0	0	0	0	0	0	0	0	0	0	0	0	0	0	0	0	0	0	0	0	0	0	0	0	0	0	0	0	0	0	0	0	0	0	0	0	0	0	0	0
D/W	Hymenoptera	Solenopsis sp.7	ISLA-UFLA	ISLA 43908	No	0	0	0	1	0	1	0	0	0	0	0	0	0	0	0	0	0	0	0	0	0	0	0	0	0	0	0	0	0	0	0	0	0	0	0	0	0	0	0	0	0	0	0	0
D/W	Hymenoptera	Strumigenys sp.1	ISLA-UFLA	ISLA 43909	No	0	0	0	0	0	0	0	0	0	0	0	0	0	0	0	0	0	0	0	0	0	0	0	0	0	0	0	0	0	0	0	0	0	0	0	0	0	0	0	0	0	0	0	0
D/W	Hymenoptera	Wasmannia sp.1	ISLA-UFLA	ISLA 43910	No	0	0	0	0	0	0	0	0	0	0	0	0	0	0	0	0	0	0	0	0	0	0	0	0	0	0	0	0	0	0	0	0	0	0	0	0	0	0	0	4	10	14	0	17
D/W	Hymenoptera	Scelioninae sp.1	ISLA-UFLA	ISLA 43911	No	0	0	0	0	0	0	0	2	2	0	0	0	0	0	0	0	0	0	0	0	0	0	0	0	0	0	0	0	0	0	0	0	0	0	0	0	0	0	0	0	0	0	0	0
D/W	Hymenoptera	Scelioninae sp.2	ISLA-UFLA	ISLA 43912	No	0	0	0	0	0	0	0	0	0	0	0	0	0	0	0	0	0	0	0	0	0	0	0	0	0	0	0	0	0	0	0	0	0	0	0	0	0	0	0	0	0	0	0	0
W	Hymenoptera	Ampulicinae sp.1	ISLA-UFLA	ISLA 43913	No	0	0	0	0	0	0	0	0	0	0	0	0	0	0	0	0	0	0	0	0	0	0	0	0	0	0	0	0	0	0	0	0	0	0	0	0	0	0	0	0	0	0	0	0
W	Hymenoptera	Sphecidae sp.1	ISLA-UFLA	ISLA 43914	No	0	0	0	0	0	0	0	0	0	0	0	0	0	0	0	0	0	0	0	0	0	0	0	0	0	1	1	0	0	0	0	0	0	0	0	0	0	0	0	0	0	0	0	0
D	Hymenoptera	Sphecidae sp.3	ISLA-UFLA	ISLA 43915	No	1	0	1	0	0	0	0	0	0	0	0	0	0	0	0	0	0	0	0	0	0	0	0	0	1	0	1	0	0	0	0	0	0	0	0	0	0	0	0	0	0	0	0	0
W	Coleoptera	Anobiidae sp.3	ISLA-UFLA	ISLA 43916	No	0	0	0	0	0	0	0	0	0	0	0	0	0	0	0	0	0	0	0	0	0	0	0	0	0	0	0	0	0	0	0	0	0	0	0	0	0	0	0	0	0	0	0	0
D	Coleoptera	Anobiidae sp.4	ISLA-UFLA	ISLA 43917	No	0	0	0	0	0	0	0	0	0	0	0	0	0	0	0	0	0	0	0	0	0	0	0	0	0	0	0	0	0	0	0	0	0	0	0	0	0	0	0	0	0	0	0	0
D	Coleoptera	Carabidae sp.11	ISLA-UFLA	ISLA 43918	No	0	0	0	0	0	0	0	0	0	0	0	0	0	0	0	0	0	0	0	0	0	0	0	0	0	0	0	0	0	0	1	0	1	0	0	0	0	0	0	0	0	0	0	0
D/W	Coleoptera	Carabidae sp.13	ISLA-UFLA	ISLA 43919	No	0	0	0	2	0	2	0	0	0	0	0	0	0	0	0	0	2	2	0	0	0	0	0	0	0	0	0	0	0	0	0	0	0	0	0	0	0	0	0	0	0	0	0	0
D	Coleoptera	Carabidae sp.16	ISLA-UFLA	ISLA 43920	No	0	0	0	0	0	0	0	0	0	0	0	0	0	0	0	0	0	0	0	0	0	0	0	0	0	0	0	0	0	0	0	0	0	0	0	0	0	0	0	0	0	0	0	0
D	Coleoptera	Carabidae sp.17	ISLA-UFLA	ISLA 43921	No	0	0	0	0	0	0	0	0	0	0	0	0	0	0	0	0	0	0	0	0	0	0	0	0	0	0	0	0	0	0	0	0	0	0	0	0	0	0	0	0	0	0	0	0
D/W	Coleoptera	Carabidae sp.6	ISLA-UFLA	ISLA 43922	No	0	0	0	0	0	0	0	0	0	0	0	0	0	0	0	0	0	0	0	0	0	0	0	0	0	0	0	0	0	0	2	1	3	0	0	0	0	0	0	0	0	0	0	0
D	Coleoptera	Carabidae sp.8	ISLA-UFLA	ISLA 43923	No	0	0	0	0	0	0	0	0	0	0	0	0	0	0	0	0	0	0	0	0	0	0	0	0	0	0	0	0	0	0	0	0	0	0	0	0	0	0	0	0	0	0	0	0
W	Coleoptera	Carabidae sp.9	ISLA-UFLA	ISLA 43924	No	0	0	0	0	0	0	0	2	2	0	0	0	0	0	0	0	0	0	0	0	0	0	0	0	0	0	0	0	0	0	0	0	0	0	0	0	0	0	0	0	0	0	0	0
W	Coleoptera	Chrysomelidae sp.10	ISLA-UFLA	ISLA 43925	No	0	0	0	0	0	0	0	0	0	0	2	2	0	0	0	0	0	0	0	0	0	0	0	0	0	0	0	0	0	0	0	0	0	0	0	0	0	0	0	0	0	0	0	0
D	Coleoptera	Chrysomelidae sp.11	ISLA-UFLA	ISLA 43926	No	0	0	0	0	0	0	0	0	0	0	0	0	0	0	0	0	0	0	0	0	0	0	0	0	0	0	0	0	0	0	0	0	0	0	0	0	0	0	0	0	0	0	0	0
D	Coleoptera	Chrysomelidae sp.2	ISLA-UFLA	ISLA 43927	No	0	0	0	0	0	0	0	0	0	0	0	0	0	0	0	0	0	0	0	0	0	0	0	0	0	0	0	2	0	2	0	0	0	0	0	0	0	0	0	0	0	0	0	0
D	Coleoptera	Chrysomelidae sp.4	ISLA-UFLA	ISLA 43928	No	0	0	0	0	0	0	0	0	0	0	0	0	0	0	0	0	0	0	0	0	0	0	0	0	0	0	0	0	0	0	0	0	0	0	0	0	0	0	0	0	0	0	0	0
W	Coleoptera	Ciidae sp.1	ISLA-UFLA	ISLA 43929	No	0	0	0	0	0	0	0	0	0	0	0	0	0	0	0	0	0	0	0	0	0	0	0	0	0	0	0	0	0	0	0	0	0	0	0	0	0	0	0	0	0	0	0	0
D	Coleoptera	Corylophidae sp.1	ISLA-UFLA	ISLA 43930	No	0	0	0	0	0	0	0	0	0	0	0	0	0	0	0	0	0	0	0	0	0	0	0	0	0	0	0	0	0	0	0	0	0	0	0	0	0	0	0	0	0	0	0	0
D	Coleoptera	Bruchinae sp.1	ISLA-UFLA	ISLA 43931	No	0	0	0	0	0	0	0	0	0	0	0	0	0	0	0	0	0	0	0	0	0	0	0	0	0	0	0	0	0	0	0	0	0	0	0	0	0	0	0	0	0	0	0	0
W	Coleoptera	Curculionidae sp.3	ISLA-UFLA	ISLA 43932	No	0	0	0	0	0	0	0	0	0	0	0	0	0	0	0	0	0	0	0	0	0	0	0	0	0	0	0	0	0	0	0	0	0	0	0	0	0	0	0	0	0	0	0	0
D	Coleoptera	Curculionidae sp.4	ISLA-UFLA	ISLA 43933	No	0	0	0	0	0	0	0	0	0	0	0	0	0	0	0	0	0	0	0	0	0	0	0	0	0	0	0	0	0	0	0	0	0	0	0	0	0	0	0	0	0	0	0	0
D	Coleoptera	Curculionidae sp.5	ISLA-UFLA	ISLA 43934	No	0	0	0	0	0	0	0	0	0	0	0	0	0	0	0	0	0	0	0	0	0	0	0	0	0	0	0	0	0	0	0	0	0	0	0	0	0	0	0	0	0	0	0	0
D	Coleoptera	Platypodinae sp.1	ISLA-UFLA	ISLA 43935	No	0	0	0	0	0	0	0	0	0	0	0	0	0	0	0	0	0	0	0	0	0	0	0	0	0	0	0	0	0	0	0	0	0	0	0	0	0	0	0	0	0	0	0	0
D	Coleoptera	Platypodinae sp.2	ISLA-UFLA	ISLA 43936	No	0	0	0	0	0	0	0	0	0	0	0	0	0	0	0	0	0	0	0	0	0	0	0	0	0	0	0	0	0	0	0	0	0	0	0	0	0	0	0	0	0	0	0	0
W	Coleoptera	Scolitinae sp.2	ISLA-UFLA	ISLA 43937	No	0	0	0	0	0	0	0	1	1	0	0	0	0	0	0	0	0	0	0	0	0	0	0	0	0	0	0	0	0	0	0	0	0	0	0	0	0	0	0	0	0	0	0	0
D/W	Coleoptera	Dytiscidae sp.1	ISLA-UFLA	ISLA 43938	No	0	0	0	0	0	0	0	0	0	0	0	0	0	0	0	0	0	0	0	0	0	0	0	0	0	0	0	0	0	0	0	2	2	0	0	0	0	0	0	0	0	0	0	0
D/W	Coleoptera	Dytiscidae sp.3	ISLA-UFLA	ISLA 43939	No	0	0	0	0	0	0	0	0	0	0	0	0	0	0	0	0	0	0	0	0	0	0	0	0	0	0	0	0	0	0	0	0	0	0	0	0	0	0	0	0	0	0	0	0
D/W	Coleoptera	Dytiscidae sp.4	ISLA-UFLA	ISLA 43940	No	0	0	0	0	0	0	0	0	0	0	0	0	0	0	0	0	0	0	0	0	0	0	0	0	0	0	0	0	0	0	0	0	0	0	0	0	0	0	0	0	0	0	0	0
D/W	Coleoptera	Elateridae sp.1	ISLA-UFLA	ISLA 43941	No	0	0	0	0	0	0	0	0	0	0	0	0	0	0	0	0	0	0	0	0	0	0	0	0	0	0	0	0	0	0	0	5	5	0	0	0	0	0	0	0	0	0	0	0
W	Coleoptera	Elateridae sp.2	ISLA-UFLA	ISLA 43942	No	0	0	0	0	0	0	0	0	0	0	0	0	0	0	0	0	0	0	0	0	0	0	0	0	0	0	0	0	0	0	0	0	0	0	0	0	0	0	0	0	0	0	0	0
D	Coleoptera	Elateridae sp.4	ISLA-UFLA	ISLA 43943	No	0	0	0	0	0	0	0	0	0	0	0	0	0	0	0	0	0	0	0	0	0	0	0	0	0	0	0	0	0	0	0	0	0	0	0	0	0	0	0	0	0	0	0	0
D	Coleoptera	Endomychidae sp.1	ISLA-UFLA	ISLA 43944	No	0	0	0	0	0	0	0	0	0	0	0	0	0	0	0	0	0	0	0	0	0	0	0	0	0	0	0	0	0	0	0	0	0	0	0	0	0	0	0	0	0	0	0	0
D	Coleoptera	Endomychidae sp.2	ISLA-UFLA	ISLA 43945	No	0	0	0	0	0	0	0	0	0	0	0	0	0	0	0	0	0	0	0	0	0	0	0	0	0	0	0	0	0	0	0	0	0	0	0	0	0	0	0	0	0	0	0	0
W	Coleoptera	Gyrinidae sp.1	ISLA-UFLA	ISLA 43946	No	0	0	0	0	0	0	0	0	0	0	0	0	0	0	0	0	0	0	0	0	0	0	0	0	0	0	0	0	0	0	0	0	0	0	0	0	0	0	0	0	0	0	0	0
D	Coleoptera	Histeridae sp.1	ISLA-UFLA	ISLA 43947	No	0	0	0	0	0	0	0	0	0	0	0	0	0	0	0	0	0	0	0	0	0	0	0	0	0	0	0	0	0	0	0	0	0	0	0	0	0	0	0	0	0	0	0	0
D	Coleoptera	Histeridae sp.2	ISLA-UFLA	ISLA 43948	No	0	0	0	0	0	0	0	0	0	0	0	0	0	0	0	0	0	0	0	0	0	0	0	0	0	0	0	0	0	0	0	0	0	0	0	0	0	0	0	0	0	0	0	0
D/W	Coleoptera	Hydrophilidae sp.2	ISLA-UFLA	ISLA 43949	No	0	0	0	0	0	0	0	0	0	0	0	0	0	0	0	0	0	0	0	0	0	0	0	0	0	0	0	0	0	0	0	0	0	0	0	0	0	0	0	0	0	0	0	0
W	Coleoptera	Leiodidae sp.1	ISLA-UFLA	ISLA 43950	No	0	0	0	0	0	0	0	0	0	0	0	0	0	0	0	0	0	0	0	0	0	0	0	0	0	0	0	0	0	0	0	0	0	0	0	0	0	0	0	0	0	0	0	0
D	Coleoptera	Nitidulidae sp.1	ISLA-UFLA	ISLA 43951	No	0	0	0	0	0	0	0	0	0	0	0	0	0	0	0	0	0	0	0	0	0	0	0	0	0	0	0	0	0	0	0	0	0	0	0	0	0	0	0	0	0	0	0	0
W	Coleoptera	Nitidulidae sp.3	ISLA-UFLA	ISLA 43952	No	0	0	0	0	0	0	0	0	0	0	0	0	0	0	0	0	0	0	0	0	0	0	0	0	0	0	0	0	0	0	0	0	0	0	0	0	0	0	0	0	0	0	0	0
D	Coleoptera	Ptiliidae sp.1	ISLA-UFLA	ISLA 43953	No	0	0	0	0	0	0	0	0	0	0	0	0	0	0	0	0	0	0	0	0	0	0	0	0	0	0	0	0	0	0	0	0	0	0	0	0	0	0	0	0	0	0	0	0
D	Coleoptera	Ptiliidae sp.4	ISLA-UFLA	ISLA 43954	No	0	0	0	0	0	0	0	0	0	0	0	0	0	0	0	0	0	0	0	0	0	0	0	0	0	0	0	0	0	0	0	0	0	0	0	0	0	0	0	0	0	0	0	0
D	Coleoptera	Scarabaeidae sp.2	ISLA-UFLA	ISLA 43955	No	0	0	0	0	0	0	0	0	0	0	0	0	0	0	0	0	0	0	0	0	0	0	0	0	0	0	0	0	0	0	0	0	0	0	0	0	0	0	0	0	0	0	0	0
D	Coleoptera	Scarabaeidae sp.3	ISLA-UFLA	ISLA 43956	No	0	0	0	0	0	0	0	0	0	0	0	0	0	0	0	0	0	0	0	0	0	0	0	0	0	0	0	0	0	0	0	0	0	0	0	0	0	0	0	0	0	0	0	0
D	Coleoptera	Scarabaeidae sp.4	ISLA-UFLA	ISLA 43957	No	0	0	0	0	0	0	0	0	0	0	0	0	0	0	0	0	0	0	0	0	0	0	0	0	0	0	0	0	0	0	0	0	0	0	0	0	0	0	0	0	0	0	0	0
W	Coleoptera	Aleocharinae sp.11	ISLA-UFLA	ISLA 43958	No	0	0	0	0	0	0	0	0	0	0	0	0	0	0	0	0	0	0	0	0	0	0	0	0	0	0	0	0	0	0	0	0	0	0	0	0	0	0	0	0	0	0	0	0
W	Coleoptera	Aleocharinae sp.12	ISLA-UFLA	ISLA 43959	No	0	0	0	0	0	0	0	0	0	0	0	0	0	0	0	0	0	0	0	0	0	0	0	0	0	0	0	0	0	0	0	0	0	0	0	0	0	0	0	0	0	0	0	0
D	Coleoptera	Aleocharinae sp.13	ISLA-UFLA	ISLA 43960	No	1	0	1	0	0	0	0	0	0	0	0	0	0	0	0	0	0	0	0	0	0	0	0	0	0	0	0	0	0	0	0	0	0	0	0	0	0	0	0	0	0	0	0	0
D	Coleoptera	Aleocharinae sp.14	ISLA-UFLA	ISLA 43962	No	0	0	0	0	0	0	0	0	0	0	0	0	0	0	0	0	0	0	0	0	0	0	0	0	0	0	0	0	0	0	1	0	1	0	0	0	0	0	0	0	0	0	0	0
D	Coleoptera	Aleocharinae sp.15	ISLA-UFLA	ISLA 43963	No	0	0	0	0	0	0	0	0	0	0	0	0	0	0	0	0	0	0	0	0	0	0	0	0	0	0	0	0	0	0	0	0	0	0	0	0	0	0	0	0	0	0	0	0
D/W	Coleoptera	Aleocharinae sp.9	ISLA-UFLA	ISLA 43964	No	0	1	1	0	0	0	0	0	0	1	0	1	0	0	0	0	0	0	0	0	0	0	0	0	0	0	0	0	0	0	0	0	0	0	0	0	0	0	0	0	0	0	0	0
D/W	Coleoptera	Arthmius sp.2	ISLA-UFLA	ISLA 43965	No	0	0	0	0	0	0	0	0	0	0	0	0	0	0	0	0	0	0	0	0	0	0	0	0	0	0	0	0	0	0	0	0	0	0	0	0	0	0	0	0	0	0	0	0
D	Coleoptera	Barrojuba sp.2	ISLA-UFLA	ISLA 43966	No	0	0	0	0	0	0	0	0	0	0	0	0	0	0	0	0	0	0	0	0	0	0	0	0	0	0	0	0	0	0	0	0	0	0	0	0	0	0	0	0	0	0	0	0
W	Coleoptera	Eausthetinae sp.1	ISLA-UFLA	ISLA 43967	No	0	0	0	0	0	0	0	0	0	0	0	0	0	0	0	0	0	0	0	0	0	0	0	0	0	0	0	0	0	0	0	0	0	0	0	0	0	0	0	0	0	0	0	0
D	Coleoptera	Euconnus sp.2	ISLA-UFLA	ISLA 43968	No	0	0	0	0	0	0	0	0	0	0	0	0	0	0	0	0	0	0	0	0	0	0	0	0	0	0	0	0	0	0	0	0	0	0	0	0	0	0	0	0	0	0	0	0
D/W	Coleoptera	Euconnus sp.3	ISLA-UFLA	ISLA 43969	No	0	0	0	0	0	0	0	0	0	0	0	0	0	0	0	0	0	0	0	0	0	0	0	0	0	0	0	0	0	0	0	0	0	0	0	0	0	0	0	0	0	0	0	0
D/W	Coleoptera	Euconnus sp.4	ISLA-UFLA	ISLA 43970	No	0	0	0	0	0	0	4	3	7	0	0	0	0	1	1	0	0	0	0	0	0	0	0	0	0	0	0	0	0	0	0	2	2	0	0	0	0	0	0	0	0	0	0	0
W	Coleoptera	Euconnus sp.5	ISLA-UFLA	ISLA 43971	No	0	0	0	0	0	0	0	0	0	0	0	0	0	0	0	0	0	0	0	0	0	0	0	0	0	0	0	0	0	0	0	0	0	0	1	1	0	0	0	0	0	0	0	0
W	Coleoptera	Euconnus sp.6	ISLA-UFLA	ISLA 43972	No	0	0	0	0	0	0	0	0	0	0	0	0	0	0	0	0	0	0	0	0	0	0	0	0	0	0	0	0	0	0	0	0	0	0	0	0	0	0	0	0	0	0	0	0
W	Coleoptera	Euconnus sp.7	ISLA-UFLA	ISLA 43973	No	0	0	0	0	0	0	0	0	0	0	0	0	0	0	0	0	0	0	0	0	0	0	0	0	0	0	0	0	0	0	0	0	0	0	0	0	0	0	0	0	0	0	0	0
D/W	Coleoptera	Eutrichites sp.1	ISLA-UFLA	ISLA 43974	No	0	1	1	0	0	0	0	0	0	0	0	0	0	0	0	0	0	0	0	0	0	0	0	0	0	0	0	1	0	1	0	0	0	0	0	0	0	0	0	0	0	0	0	0
D	Coleoptera	Glandurini sp.2	ISLA-UFLA	ISLA 43975	No	1	0	1	0	0	0	0	0	0	0	0	0	0	0	0	0	0	0	0	0	0	0	0	0	0	0	0	0	0	0	0	0	0	0	0	0	0	0	0	0	0	0	0	0
W	Coleoptera	Globa sp.1	ISLA-UFLA	ISLA 43976	No	0	0	0	0	0	0	0	0	0	0	0	0	0	0	0	0	0	0	0	0	0	0	0	0	0	0	0	0	0	0	0	0	0	0	0	0	0	0	0	0	0	0	0	0
D	Coleoptera	Goniaceros sp.1	ISLA-UFLA	ISLA 43977	No	0	0	0	0	0	0	0	0	0	0	0	0	0	0	0	0	0	0	0	0	0	0	0	0	0	0	0	1	0	1	0	0	0	0	0	0	0	0	0	0	0	0	0	0
D/W	Coleoptera	Holotrochus sp.1	ISLA-UFLA	ISLA 43978	No	1	0	1	0	0	0	0	0	0	0	0	0	0	0	0	0	0	0	0	0	0	0	0	0	0	0	0	0	0	0	0	0	0	0	0	0	0	0	0	0	0	0	0	0
W	Coleoptera	Jubus sp.3	ISLA-UFLA	ISLA 43979	No	0	0	0	0	0	0	0	0	0	0	0	0	0	0	0	0	0	0	0	0	0	0	0	0	0	0	0	0	0	0	0	0	0	0	0	0	0	0	0	0	0	0	0	0
W	Coleoptera	Megalopinus sp.1	ISLA-UFLA	ISLA 43980	No	0	0	0	0	0	0	0	0	0	0	0	0	0	0	0	0	0	0	0	0	0	0	0	0	0	0	0	0	0	0	0	0	0	0	0	0	0	0	0	0	0	0	0	0
D/W	Coleoptera	Microscydmus sp.1	ISLA-UFLA	ISLA 43981	No	0	0	0	0	0	0	1	0	1	0	0	0	0	0	0	0	0	0	0	0	0	0	0	0	0	0	0	0	0	0	0	0	0	0	0	0	0	0	0	0	0	0	0	0
D	Coleoptera	Paederinae sp.11	ISLA-UFLA	ISLA 43982	No	0	0	0	0	0	0	0	0	0	0	0	0	0	0	0	0	0	0	0	0	0	0	0	0	0	0	0	0	0	0	3	0	3	0	0	0	0	0	0	0	0	0	0	0
D	Coleoptera	Paederinae sp.12	ISLA-UFLA	ISLA 43983	No	0	0	0	0	0	0	0	0	0	0	0	0	0	0	0	0	0	0	0	0	0	0	0	0	0	0	0	0	0	0	0	0	0	0	0	0	0	0	0	0	0	0	0	0
D/W	Coleoptera	Paederinae sp.2	ISLA-UFLA	ISLA 43984	No	0	0	0	0	0	0	0	0	0	0	0	0	0	0	0	0	0	0	0	0	0	0	0	0	0	0	0	0	0	0	1	2	3	0	0	0	0	0	0	0	0	0	0	0
D	Coleoptera	Paederinae sp.3	ISLA-UFLA	ISLA 43986	No	0	0	0	0	0	0	0	0	0	0	0	0	0	0	0	0	0	0	0	0	0	0	0	0	0	0	0	0	0	0	0	0	0	0	0	0	0	0	0	0	0	0	0	0
W	Coleoptera	Paederinae sp.9	ISLA-UFLA	ISLA 43987	No	0	0	0	0	0	0	0	0	0	0	0	0	0	0	0	0	0	0	0	0	0	0	0	0	0	0	0	0	0	0	0	1	1	0	0	0	0	0	0	0	0	0	0	0
W	Coleoptera	Staphylinidae sp.2	ISLA-UFLA	ISLA 43988	No	0	0	0	0	0	0	0	0	0	0	0	0	0	0	0	0	0	0	0	0	0	0	0	0	0	0	0	0	0	0	0	2	2	0	0	0	0	0	0	0	0	0	0	0
W	Coleoptera	Syrbatus sp.1	ISLA-UFLA	ISLA 43989	No	0	0	0	0	0	0	0	0	0	0	0	0	0	0	0	0	0	0	0	0	0	0	0	0	0	0	0	0	0	0	0	0	0	0	0	0	0	0	0	0	0	0	0	0
W	Coleoptera	Syrbatus sp.2	ISLA-UFLA	ISLA 43990	No	0	0	0	0	0	0	0	0	0	0	0	0	0	0	0	0	0	0	0	0	0	0	0	0	0	0	0	0	0	0	0	0	0	0	0	0	0	0	0	0	0	0	0	0
W	Coleoptera	Cephaloplectinae sp.1	ISLA-UFLA	ISLA 43991	No	0	0	0	0	0	0	0	0	0	0	0	0	0	0	0	0	0	0	0	0	0	0	0	0	0	0	0	0	0	0	0	0	0	0	0	0	0	0	0	0	0	0	0	0
D/W	Coleoptera	Tachyporinae sp.2	ISLA-UFLA	ISLA 43992	No	0	0	0	0	0	0	0	0	0	0	0	0	0	0	0	0	0	0	0	0	0	0	0	0	0	0	0	0	0	0	0	0	0	0	0	0	0	0	0	0	0	0	0	0
W	Coleoptera	Tachyporinae sp.3	ISLA-UFLA	ISLA 43993	No	0	0	0	0	0	0	0	0	0	0	0	0	0	0	0	0	0	0	0	0	0	0	0	0	0	0	0	0	0	0	0	0	0	0	0	0	0	0	0	0	0	0	0	0
W	Coleoptera	Tachyporinae sp.4	ISLA-UFLA	ISLA 43994	No	0	0	0	0	0	0	0	0	0	0	0	0	0	0	0	0	0	0	0	0	0	0	0	0	0	0	0	0	0	0	0	0	0	0	0	0	0	0	0	0	0	0	0	0
W	Coleoptera	Trichonychina sp.1	ISLA-UFLA	ISLA 43995	No	0	0	0	0	0	0	0	0	0	0	0	0	0	0	0	0	0	0	0	0	0	0	0	0	0	0	0	0	0	0	0	0	0	0	0	0	0	0	0	0	0	0	0	0
W	Coleoptera	Tumboecus sp.1	ISLA-UFLA	ISLA 43996	No	0	0	0	0	0	0	0	0	0	0	0	0	0	0	0	0	0	0	0	0	0	0	0	0	0	0	0	0	0	0	0	1	1	0	0	0	0	0	0	0	0	0	0	0
D	Coleoptera	Lagrinae sp.1	ISLA-UFLA	ISLA 43997	No	0	0	0	0	0	0	0	0	0	0	0	0	0	0	0	0	0	0	0	0	0	0	0	0	0	0	0	0	0	0	0	0	0	0	0	0	0	0	0	0	0	0	0	0
D	Coleoptera	Tenebrionidae sp.4	ISLA-UFLA	ISLA 43998	No	0	0	0	0	0	0	0	0	0	0	0	0	0	0	0	0	0	0	0	0	0	0	0	0	0	0	0	0	0	0	0	0	0	0	0	0	0	0	0	0	0	0	0	0
D/W	Neuroptera	Plega cf. paraense	ISLA-UFLA	ISLA 43999	No	0	0	0	0	0	0	0	0	0	0	1	1	0	0	0	0	0	0	0	0	0	0	0	0	0	0	0	1	1	2	0	0	0	0	0	0	0	0	0	0	0	0	0	0
D	Trichoptera	Leptoceridae sp.1	ISLA-UFLA	ISLA 44000	No	0	0	0	0	0	0	0	0	0	0	0	0	0	0	0	0	0	0	0	0	0	0	0	0	0	0	0	0	0	0	0	0	0	0	0	0	0	0	0	0	0	0	0	0
D/W	Lepidoptera	Pyrginae sp.1	ISLA-UFLA	ISLA 44001	No	0	0	0	1	0	1	0	0	0	0	0	0	0	0	0	0	0	0	0	0	0	0	0	0	0	0	0	0	0	0	0	0	0	0	0	0	0	0	0	0	0	0	0	0
D	Lepidoptera	Pyrginae sp.2	ISLA-UFLA	ISLA 44002	No	0	0	0	0	0	0	0	0	0	0	0	0	0	0	0	0	0	0	0	0	0	0	0	0	0	0	0	0	0	0	0	0	0	0	0	0	0	0	0	0	0	0	0	0
D	Lepidoptera	Latebraria sp.1	ISLA-UFLA	ISLA 44003	No	0	0	0	0	0	0	0	0	0	0	0	0	0	0	0	0	0	0	0	0	0	0	0	0	0	0	0	0	0	0	0	0	0	0	0	0	0	0	0	0	0	0	0	0
D/W	Lepidoptera	Noctuidae subf.1 sp.1	ISLA-UFLA	ISLA 44004	No	0	0	0	0	0	0	0	0	0	6	0	6	0	0	0	0	0	0	1	0	1	0	0	0	0	0	0	0	0	0	0	0	0	0	0	0	0	0	0	0	5	5	0	0
D/W	Lepidoptera	Noctuidae subf.1 sp.2	ISLA-UFLA	ISLA 44005	No	0	0	0	0	0	0	0	0	0	0	0	0	0	0	0	0	0	0	0	0	0	0	0	0	0	0	0	0	0	0	0	0	0	0	0	0	0	0	0	0	0	0	0	0
D/W	Lepidoptera	Noctuidae subf.1 sp.3	ISLA-UFLA	ISLA 44006	No	0	0	0	0	0	0	0	0	0	0	0	0	0	0	0	0	0	0	0	0	0	0	0	0	0	0	0	1	0	1	0	0	0	0	0	0	0	0	0	0	0	0	0	0
D/W	Lepidoptera	Noctuidae subf.1 sp.4	ISLA-UFLA	ISLA 44007	No	0	0	0	0	0	0	0	0	0	0	0	0	0	0	0	0	0	0	0	0	0	0	0	0	0	0	0	0	0	0	0	0	0	0	0	0	0	0	0	0	0	0	0	0
D	Lepidoptera	Noctuidae subf.1 sp.5	ISLA-UFLA	ISLA 44008	No	0	0	0	0	0	0	0	0	0	0	0	0	0	0	0	0	0	0	0	0	0	0	0	0	0	0	0	0	0	0	0	0	0	0	0	0	0	0	0	0	0	0	0	0
W	Lepidoptera	Noctuidae subf.1 sp.6	ISLA-UFLA	ISLA 44009	No	0	0	0	0	0	0	0	0	0	0	0	0	0	0	0	0	0	0	0	0	0	0	0	0	0	0	0	0	0	0	0	0	0	0	0	0	0	0	0	0	0	0	0	0
D/W	Lepidoptera	Noctuidae subf.2 sp.1	ISLA-UFLA	ISLA 44010	No	0	0	0	0	0	0	0	0	0	0	0	0	0	0	0	0	0	0	0	0	0	0	3	3	0	0	0	1	1	2	0	0	0	3	3	6	0	0	0	0	0	0	0	1
D/W	Lepidoptera	Noctuidae subf.2 sp.2	ISLA-UFLA	ISLA 44011	No	0	3	3	0	0	0	2	0	2	0	1	1	0	0	0	0	0	0	0	2	2	0	0	0	0	0	0	0	0	0	0	0	0	0	0	0	2	0	2	0	1	1	0	0
D/W	Lepidoptera	Noctuidae subf.2 sp.3	ISLA-UFLA	ISLA 44012	No	0	0	0	0	0	0	0	0	0	0	1	1	0	0	0	0	0	0	0	0	0	0	0	0	0	0	0	0	0	0	0	0	0	0	0	0	1	0	1	0	0	0	0	0
D/W	Lepidoptera	Noctuidae subf.3 sp.1	ISLA-UFLA	ISLA 44013	No	0	0	0	0	0	0	0	0	0	0	0	0	0	0	0	0	0	0	0	0	0	0	0	0	0	0	0	0	0	0	0	0	0	0	0	0	0	0	0	0	0	0	0	0
D/W	Lepidoptera	Tineidae sp.1	ISLA-UFLA	ISLA 44014	No	0	0	0	0	3	3	0	0	0	0	0	0	0	0	0	0	5	5	0	0	0	0	2	2	0	0	0	0	0	0	0	0	0	0	0	0	1	6	7	0	0	0	0	0
D/W	Lepidoptera	Tineidae sp.3	ISLA-UFLA	ISLA 44015	No	2	0	2	0	0	0	7	4	11	0	0	0	0	0	0	3	0	3	2	0	2	1	0	1	0	3	3	0	0	0	0	2	2	0	0	0	0	0	0	0	0	0	0	14
W	Lepidoptera	Tineidae sp.4	ISLA-UFLA	ISLA 44016	No	0	0	0	0	0	0	0	0	0	0	0	0	0	0	0	0	0	0	0	1	1	0	0	0	0	0	0	0	0	0	0	0	0	0	0	0	0	0	0	0	1	1	0	0
D/W	Lepidoptera	Tineidae sp.5	ISLA-UFLA	ISLA 44017	No	0	0	0	0	0	0	0	0	0	0	0	0	0	0	0	0	0	0	0	0	0	0	0	0	0	0	0	0	1	1	0	0	0	0	0	0	0	0	0	0	0	0	0	0
D/W	Lepidoptera	Yponomeutidae sp.1	ISLA-UFLA	ISLA 44018	No	0	0	0	0	0	0	0	0	0	0	0	0	0	0	0	0	0	0	0	0	0	0	0	0	0	0	0	0	0	0	0	0	0	0	0	0	0	0	0	0	0	0	0	0
D/W	Diptera	Cecidomyiidae sp.3	ISLA-UFLA	ISLA 44019	No	0	0	0	0	0	0	0	0	0	0	0	0	0	0	0	0	0	0	0	0	0	0	0	0	0	0	0	0	0	0	0	0	0	0	0	0	0	0	0	0	0	0	0	0
W	Diptera	Cecidomyiidae sp.4	ISLA-UFLA	ISLA 44020	No	0	0	0	0	0	0	0	0	0	0	0	0	0	0	0	0	0	0	0	2	2	0	0	0	0	0	0	0	0	0	0	0	0	0	0	0	0	0	0	0	0	0	0	0
D	Diptera	Cecidomyiidae sp.5	ISLA-UFLA	ISLA 44021	No	0	0	0	0	0	0	0	0	0	0	0	0	0	0	0	0	0	0	0	0	0	0	0	0	0	0	0	0	0	0	0	0	0	0	0	0	0	0	0	0	0	0	0	0
W	Diptera	Cecidomyiidae sp.6	ISLA-UFLA	ISLA 44022	No	0	0	0	0	0	0	0	0	0	0	0	0	0	0	0	0	0	0	0	0	0	0	0	0	0	0	0	0	0	0	0	0	0	0	1	1	0	0	0	0	0	0	0	0
W	Diptera	Cecidomyiidae sp.7	ISLA-UFLA	ISLA 44023	No	0	0	0	0	0	0	0	0	0	0	0	0	0	0	0	0	0	0	0	0	0	0	0	0	0	0	0	0	0	0	0	0	0	0	0	0	0	0	0	0	0	0	0	0
W	Diptera	Cecidomyiidae sp.8	ISLA-UFLA	ISLA 44024	No	0	0	0	0	0	0	0	0	0	0	0	0	0	0	0	0	0	0	0	0	0	0	0	0	0	0	0	0	0	0	0	0	0	0	0	0	0	0	0	0	0	0	0	0
D	Diptera	Chloropidae sp.1	ISLA-UFLA	ISLA 44025	No	0	0	0	0	0	0	0	0	0	0	0	0	0	0	0	0	0	0	0	0	0	0	0	0	0	0	0	0	0	0	0	0	0	0	0	0	0	0	0	0	0	0	0	0
D	Diptera	Clusiidae sp.1	ISLA-UFLA	ISLA 44026	No	0	0	0	0	0	0	0	0	0	0	0	0	0	0	0	0	0	0	0	0	0	0	0	0	0	0	0	0	0	0	0	0	0	0	0	0	0	0	0	0	0	0	0	0
D	Diptera	Clusiidae sp.2	ISLA-UFLA	ISLA 44027	No	0	0	0	0	0	0	0	0	0	0	0	0	0	0	0	0	0	0	0	0	0	0	0	0	0	0	0	0	0	0	0	0	0	0	0	0	0	0	0	0	0	0	0	0
D	Diptera	Culicidae sp.10	ISLA-UFLA	ISLA 44028	No	0	0	0	0	0	0	0	0	0	0	0	0	0	0	0	0	0	0	0	0	0	0	0	0	0	0	0	0	0	0	0	0	0	0	0	0	0	0	0	0	0	0	0	0
D/W	Diptera	Culicidae sp.11	ISLA-UFLA	ISLA 44029	No	0	0	0	0	0	0	0	0	0	0	0	0	0	0	0	0	0	0	0	0	0	0	0	0	0	0	0	0	0	0	0	0	0	0	0	0	0	0	0	0	0	0	0	0
D	Diptera	Culicidae sp.12	ISLA-UFLA	ISLA 44030	No	0	0	0	0	0	0	0	0	0	0	0	0	0	0	0	0	0	0	0	0	0	0	0	0	0	0	0	0	0	0	0	0	0	0	0	0	0	0	0	0	0	0	0	0
D/W	Diptera	Culicidae sp.17	ISLA-UFLA	ISLA 44031	No	0	0	0	0	0	0	0	0	0	0	0	0	0	0	0	0	0	0	0	0	0	0	0	0	0	0	0	0	0	0	0	0	0	0	0	0	0	0	0	0	1	1	0	0
W	Diptera	Culicidae sp.18	ISLA-UFLA	ISLA 44032	No	0	0	0	0	0	0	0	0	0	0	0	0	0	0	0	0	0	0	0	0	0	0	0	0	0	0	0	0	0	0	0	0	0	0	0	0	0	0	0	0	0	0	0	0
W	Diptera	Culicidae sp.19	ISLA-UFLA	ISLA 44033	No	0	0	0	0	0	0	0	0	0	0	0	0	0	0	0	0	0	0	0	0	0	0	0	0	0	0	0	0	0	0	0	0	0	0	0	0	0	0	0	0	0	0	0	0
D	Diptera	Culicidae sp.2	ISLA-UFLA	ISLA 44034	No	0	0	0	0	0	0	0	0	0	0	0	0	0	0	0	0	0	0	0	0	0	0	0	0	0	0	0	0	0	0	0	0	0	0	0	0	0	0	0	0	0	0	0	0
D/W	Diptera	Culicidae sp.20	ISLA-UFLA	ISLA 44035	No	0	0	0	0	0	0	0	0	0	0	0	0	0	0	0	0	0	0	0	0	0	0	0	0	0	0	0	0	0	0	0	0	0	0	0	0	0	0	0	0	0	0	0	0
W	Diptera	Culicidae sp.21	ISLA-UFLA	ISLA 44036	No	0	0	0	0	0	0	0	0	0	0	0	0	0	0	0	0	0	0	0	0	0	0	0	0	0	0	0	0	0	0	0	0	0	0	0	0	0	0	0	0	0	0	0	0
D/W	Diptera	Culicidae sp.3	ISLA-UFLA	ISLA 44037	No	0	0	0	0	0	0	0	0	0	0	0	0	0	0	0	0	0	0	0	0	0	0	0	0	0	0	0	0	0	0	0	0	0	0	0	0	0	0	0	0	0	0	0	0
D	Diptera	Culicidae sp.4	ISLA-UFLA	ISLA 44038	No	0	0	0	0	0	0	0	0	0	0	0	0	0	0	0	0	0	0	0	0	0	0	0	0	0	0	0	0	0	0	0	0	0	1	0	1	0	0	0	0	0	0	0	0
D/W	Diptera	Culicidae sp.5	ISLA-UFLA	ISLA 44039	No	0	0	0	0	0	0	0	0	0	0	0	0	0	0	0	0	0	0	0	0	0	0	0	0	0	0	0	0	0	0	0	0	0	0	0	0	0	0	0	0	0	0	0	0
D/W	Diptera	Culicidae sp.9	ISLA-UFLA	ISLA 44040	No	0	0	0	0	0	0	0	0	0	0	0	0	0	0	0	0	0	0	0	0	0	0	0	0	0	0	0	0	0	0	0	0	0	0	0	0	0	0	0	0	0	0	0	0
D	Diptera	Ditomyiidae sp.1	ISLA-UFLA	ISLA 44041	No	0	0	0	0	0	0	0	0	0	0	0	0	0	0	0	0	0	0	0	0	0	0	0	0	0	0	0	0	0	0	0	0	0	0	0	0	0	0	0	0	0	0	0	0
D	Diptera	Dolichopodidae sp.2	ISLA-UFLA	ISLA 44042	No	3751	0	3751	600	0	600	115	0	115	500	0	500	0	0	0	550	0	550	250	0	250	3000	0	3000	530	0	530	200	0	200	0	0	0	1000	0	1000	0	0	0	0	0	0	12	0
W	Diptera	Drosophilidae sp.1	ISLA-UFLA	ISLA 44043	No	0	1	1	0	0	0	0	0	0	0	0	0	0	0	0	0	0	0	0	0	0	0	0	0	0	0	0	0	0	0	0	0	0	0	0	0	0	0	0	0	0	0	0	0
D	Diptera	Drosophilidae sp.12	ISLA-UFLA	ISLA 44044	No	0	0	0	0	0	0	0	0	0	0	0	0	0	0	0	0	0	0	0	0	0	0	0	0	0	0	0	0	0	0	0	0	0	0	0	0	0	0	0	0	0	0	0	0
D/W	Diptera	Drosophilidae sp.13	ISLA-UFLA	ISLA 44045	No	0	0	0	0	0	0	0	0	0	0	0	0	0	0	0	0	0	0	0	0	0	0	0	0	0	0	0	0	0	0	0	0	0	0	0	0	0	0	0	0	0	0	0	0
W	Diptera	Drosophilidae sp.14	ISLA-UFLA	ISLA 44046	No	0	0	0	0	0	0	0	0	0	0	0	0	0	0	0	0	0	0	0	0	0	0	0	0	0	0	0	0	0	0	0	0	0	0	0	0	0	0	0	0	0	0	0	0
D/W	Diptera	Drosophilidae sp.2	ISLA-UFLA	ISLA 44047	No	0	0	0	0	0	0	0	0	0	0	0	0	0	0	0	0	0	0	19	0	19	0	0	0	60	0	60	0	0	0	30	8	38	0	0	0	0	0	0	0	0	0	1	0
D/W	Diptera	Drosophilidae sp.4	ISLA-UFLA	ISLA 44048	No	0	0	0	0	0	0	0	0	0	0	0	0	0	0	0	0	0	0	0	0	0	0	0	0	0	0	0	0	0	0	0	0	0	0	0	0	0	0	0	0	0	0	0	0
D	Diptera	Keroplatidae sp.1	ISLA-UFLA	ISLA 44049	No	0	0	0	0	0	0	0	0	0	0	0	0	0	0	0	0	0	0	0	0	0	0	0	0	0	0	0	0	0	0	0	0	0	0	0	0	0	0	0	0	0	0	0	0
D	Diptera	Lauxaniidae sp.1	ISLA-UFLA	ISLA 44050	No	0	0	0	0	0	0	0	0	0	0	0	0	0	0	0	0	0	0	0	0	0	0	0	0	0	0	0	0	0	0	0	0	0	0	0	0	0	0	0	0	0	0	0	0
D	Diptera	Micropezidae sp.2	ISLA-UFLA	ISLA 44051	No	0	0	0	0	0	0	0	0	0	0	0	0	0	0	0	0	0	0	0	0	0	0	0	0	0	0	0	0	0	0	0	0	0	0	0	0	0	0	0	0	0	0	0	0
D	Diptera	Muscidae sp.1	ISLA-UFLA	ISLA 44052	No	0	0	0	0	0	0	0	0	0	0	0	0	0	0	0	0	0	0	0	0	0	0	0	0	0	0	0	0	0	0	0	0	0	0	0	0	0	0	0	0	0	0	0	0
D	Diptera	Phoridae 11	ISLA-UFLA	ISLA 44053	No	0	0	0	0	0	0	0	0	0	0	0	0	0	0	0	0	0	0	0	0	0	0	0	0	2	0	2	0	0	0	0	0	0	0	0	0	0	0	0	0	0	0	0	0
D	Diptera	Phoridae 12	ISLA-UFLA	ISLA 44054	No	0	0	0	0	0	0	0	0	0	0	0	0	0	0	0	0	0	0	0	0	0	0	0	0	0	0	0	0	0	0	0	0	0	0	0	0	1	0	1	0	0	0	0	0
D	Diptera	Phoridae 13	ISLA-UFLA	ISLA 44055	No	0	0	0	0	0	0	0	0	0	0	0	0	0	0	0	0	0	0	0	0	0	0	0	0	0	0	0	0	0	0	0	0	0	0	0	0	0	0	0	0	0	0	0	0
D/W	Diptera	Phoridae 3	ISLA-UFLA	ISLA 44056	No	0	0	0	0	0	0	0	0	0	0	0	0	0	0	0	0	0	0	0	0	0	0	0	0	0	0	0	0	0	0	0	0	0	0	0	0	0	0	0	0	0	0	0	0
D	Diptera	Phoridae 4	ISLA-UFLA	ISLA 44057	No	0	0	0	0	0	0	0	0	0	0	0	0	0	0	0	0	0	0	0	0	0	0	0	0	0	0	0	0	0	0	0	0	0	0	0	0	0	0	0	0	0	0	0	0
W	Diptera	Phoridae 5	ISLA-UFLA	ISLA 44058	No	0	0	0	0	0	0	0	0	0	0	0	0	0	0	0	0	0	0	0	0	0	0	0	0	0	0	0	0	0	0	0	0	0	0	0	0	0	0	0	0	0	0	0	0
D/W	Diptera	Phoridae 8	ISLA-UFLA	ISLA 44059	No	0	0	0	0	0	0	0	0	0	0	0	0	0	0	0	0	0	0	0	0	0	0	0	0	0	0	0	0	0	0	0	0	0	0	0	0	0	0	0	0	0	0	0	0
D/W	Diptera	Lutzomyia sp.1	ISLA-UFLA	ISLA 44060	No	15	31	46	0	0	0	9	71	80	7	1	8	53	1	54	0	0	0	1	2	3	0	3	3	0	0	0	7	17	24	3	1	4	5	4	9	0	11	11	30	20	50	1	14
D/W	Diptera	Lutzomyia sp.2	ISLA-UFLA	ISLA 44061	No	0	0	0	0	7	7	0	0	0	0	0	0	0	0	0	0	0	0	0	0	0	0	0	0	0	0	0	0	0	0	0	0	0	0	0	0	0	0	0	0	0	0	0	0
D	Diptera	Phlebotominae sp.4	ISLA-UFLA	ISLA 44062	No	0	0	0	0	0	0	0	0	0	0	0	0	0	0	0	0	0	0	0	0	0	0	0	0	0	0	0	0	0	0	0	0	0	0	0	0	0	0	0	0	0	0	0	0
D/W	Diptera	Psychodidae sp.1	ISLA-UFLA	ISLA 44063	No	0	0	0	0	0	0	0	0	0	0	0	0	0	0	0	0	0	0	0	0	0	0	0	0	0	0	0	0	0	0	0	0	0	0	0	0	0	0	0	0	0	0	0	0
D/W	Diptera	Psychodidae sp.3	ISLA-UFLA	ISLA 44064	No	0	0	0	0	0	0	0	0	0	0	0	0	0	0	0	0	0	0	0	0	0	0	0	0	0	0	0	0	0	0	0	0	0	0	0	0	0	0	0	0	0	0	0	0
W	Diptera	Sciaridae sp.1	ISLA-UFLA	ISLA 44065	No	0	0	0	0	0	0	0	0	0	0	0	0	0	0	0	0	0	0	0	0	0	0	0	0	0	0	0	0	0	0	0	0	0	0	0	0	0	0	0	0	0	0	0	0
W	Diptera	Sciaridae sp.10	ISLA-UFLA	ISLA 44066	No	0	1	1	0	0	0	0	0	0	0	0	0	0	0	0	0	0	0	0	0	0	0	0	0	0	0	0	0	0	0	0	0	0	0	0	0	0	0	0	0	0	0	0	0
D	Diptera	Sciaridae sp.11	ISLA-UFLA	ISLA 44067	No	0	0	0	0	0	0	0	0	0	0	0	0	0	0	0	0	0	0	0	0	0	0	0	0	0	0	0	0	0	0	1	0	1	0	0	0	0	0	0	0	0	0	0	0
D	Diptera	Sciaridae sp.3	ISLA-UFLA	ISLA 44068	No	0	0	0	0	0	0	0	0	0	0	0	0	0	0	0	0	0	0	0	0	0	0	0	0	0	0	0	0	0	0	0	0	0	0	0	0	0	0	0	0	0	0	0	0
D/W	Diptera	Sciaridae sp.8	ISLA-UFLA	ISLA 44069	No	0	0	0	0	0	0	0	1	1	0	0	0	0	0	0	0	0	0	0	0	0	0	0	0	0	0	0	0	0	0	0	0	0	0	0	0	0	0	0	0	0	0	1	0
D	Diptera	Sciaridae sp.9	ISLA-UFLA	ISLA 44070	No	0	0	0	0	0	0	0	0	0	0	0	0	0	0	0	0	0	0	0	0	0	0	0	0	0	0	0	0	0	0	3	0	3	0	0	0	0	0	0	0	0	0	0	0
W	Diptera	Sphaeroceridae sp.3	ISLA-UFLA	ISLA 44071	No	0	0	0	0	0	0	0	0	0	0	0	0	0	0	0	0	0	0	0	0	0	0	0	0	0	0	0	0	0	0	0	0	0	0	0	0	0	0	0	0	0	0	0	0
W	Diptera	Sphaeroceridae sp.4	ISLA-UFLA	ISLA 44072	No	0	0	0	0	0	0	0	2	2	0	0	0	0	0	0	0	0	0	0	0	0	0	0	0	0	0	0	0	0	0	0	0	0	0	0	0	0	0	0	0	0	0	0	0
D	Diptera	Streblidae sp.3	ISLA-UFLA	ISLA 44073	No	0	0	0	0	0	0	0	0	0	0	0	0	0	0	0	0	0	0	0	0	0	0	0	0	0	0	0	0	0	0	0	0	0	0	0	0	0	0	0	0	0	0	0	0
D	Diptera	Tabanidae sp.2	ISLA-UFLA	ISLA 44074	No	0	0	0	0	0	0	0	0	0	0	0	0	0	0	0	0	0	0	0	0	0	0	0	0	0	0	0	0	0	0	0	0	0	0	0	0	1	0	1	0	0	0	0	0
W	Diptera	Tabanidae sp.3	ISLA-UFLA	ISLA 44075	No	0	0	0	0	0	0	0	0	0	0	0	0	0	0	0	0	0	0	0	0	0	0	0	0	0	0	0	0	0	0	0	0	0	0	0	0	0	0	0	0	0	0	0	0
D	Diptera	Tachinidae sp.3	ISLA-UFLA	ISLA 44076	No	0	0	0	0	0	0	0	0	0	0	0	0	0	0	0	0	0	0	0	0	0	0	0	0	0	0	0	0	0	0	0	0	0	0	0	0	0	0	0	0	0	0	0	0
D/W	Diptera	Tipulidae sp.1	ISLA-UFLA	ISLA 44077	No	0	0	0	3	0	3	4	0	4	0	1	1	0	0	0	0	0	0	0	0	0	0	0	0	0	0	0	0	0	0	1	0	1	0	0	0	1	0	1	0	0	0	0	2
W	Siphonaptera	cf. Pulex sp.1	ISLA-UFLA	ISLA 44078	No	0	0	0	0	0	0	0	0	0	0	0	0	0	0	0	0	0	0	0	0	0	0	0	0	0	0	0	0	0	0	0	0	0	0	0	0	0	0	0	0	0	0	0	0
D/W	Gastropoda	Leptinaria sp.1	ISLA-UFLA	ISLA 44079	No	1	8	9	0	0	0	7	11	18	0	0	0	0	0	0	0	0	0	0	0	0	0	0	0	0	0	0	0	0	0	0	3	3	0	0	0	0	0	0	0	0	0	0	0
D/W	Gastropoda	Leptinaria sp.2	ISLA-UFLA	ISLA 44080	No	0	0	0	0	0	0	0	0	0	0	0	0	0	0	0	0	0	0	0	0	0	0	0	0	0	0	0	0	0	0	0	1	1	0	0	0	0	0	0	0	0	0	0	0
D/W	Gastropoda	Obeliscinae sp.1	ISLA-UFLA	ISLA 44081	No	0	0	0	0	0	0	2	0	2	0	0	0	0	0	0	0	0	0	0	0	0	0	0	0	0	0	0	0	0	0	0	0	0	0	0	0	0	0	0	0	0	0	0	0
W	Gastropoda	Obeliscinae sp.2	ISLA-UFLA	ISLA 44082	No	0	0	0	0	0	0	0	0	0	0	0	0	0	0	0	0	0	0	0	0	0	0	0	0	0	0	0	0	0	0	0	0	0	0	0	0	0	0	0	0	0	0	0	0
W	Gastropoda	Obeliscinae sp.3	ISLA-UFLA	ISLA 44083	No	0	0	0	0	0	0	0	0	0	0	0	0	0	0	0	0	0	0	0	0	0	0	0	0	0	0	0	0	0	0	0	0	0	0	0	0	0	0	0	0	0	0	0	0
D/W	Gastropoda	Subulinidae indet.	-	-	No	0	0	0	0	0	0	0	0	0	0	0	0	0	0	0	0	0	0	0	0	0	0	0	0	0	0	0	0	0	0	2	0	2	0	0	0	0	0	0	0	0	0	0	0
D/W	Gastropoda	Subulinidae sp.1	ISLA-UFLA	ISLA 44084	No	0	0	0	0	0	0	0	1	1	0	0	0	0	0	0	0	0	0	0	0	0	0	0	0	0	0	0	0	0	0	0	0	0	0	0	0	0	0	0	0	0	0	0	0
D/W	Gastropoda	Happia sp.1	ISLA-UFLA	ISLA 44085	No	3	0	3	0	0	0	0	1	1	1	0	1	1	2	3	0	0	0	0	0	0	0	0	0	0	0	0	0	0	0	1	0	1	0	0	0	0	1	1	0	0	0	0	0
D/W	Gastropoda	Systrophiidae indet.	-	-	No	0	0	0	0	0	0	0	0	0	0	0	0	0	0	0	0	0	0	0	0	0	0	0	0	0	0	0	0	0	0	0	0	0	0	0	0	0	0	0	0	0	0	0	0
D/W	Coleoptera	Carabidae immature	ISLA-UFLA	ISLA 44086	No	0	0	0	0	0	0	0	0	0	0	0	0	0	0	0	0	0	0	0	1	1	0	0	0	0	0	0	0	0	0	0	0	0	0	0	0	0	0	0	0	0	0	0	0
D	Coleoptera	Cleridae immature	ISLA-UFLA	ISLA 44087	No	0	0	0	0	0	0	0	0	0	0	0	0	0	0	0	0	0	0	0	0	0	0	0	0	0	0	0	0	0	0	0	0	0	0	0	0	0	0	0	0	0	0	0	0
D/W	Coleoptera	Dermestidae immature	ISLA-UFLA	ISLA 44088	No	1	0	1	0	0	0	0	1	1	0	1	1	0	0	0	0	0	0	0	0	0	0	0	0	0	0	0	0	0	0	0	0	0	0	0	0	0	2	2	0	0	0	0	0
W	Coleoptera	Dytiscidae immature	ISLA-UFLA	ISLA 44089	No	0	0	0	0	0	0	0	0	0	0	0	0	0	0	0	0	0	0	0	0	0	0	0	0	0	0	0	0	0	0	0	1	1	0	0	0	0	0	0	0	0	0	0	0
W	Coleoptera	Agrypninae immature	ISLA-UFLA	ISLA 44090	No	0	0	0	0	0	0	0	0	0	0	1	1	0	0	0	0	0	0	0	0	0	0	0	0	0	0	0	0	0	0	0	0	0	0	0	0	0	0	0	0	0	0	0	0
D/W	Coleoptera	Cardiophorinae immature	ISLA-UFLA	ISLA 44091	No	0	0	0	0	0	0	0	0	0	0	0	0	0	0	0	0	0	0	1	0	1	0	0	0	0	0	0	0	1	1	0	0	0	0	0	0	0	0	0	0	0	0	0	0
W	Coleoptera	Elateridae immature	ISLA-UFLA	ISLA 44092	No	0	0	0	0	0	0	0	0	0	0	0	0	0	0	0	0	0	0	0	0	0	0	0	0	0	0	0	0	0	0	0	0	0	0	0	0	0	0	0	0	0	0	0	0
D/W	Coleoptera	Scarabaeidae immature	ISLA-UFLA	ISLA 44093	No	0	0	0	0	0	0	0	0	0	0	0	0	0	0	0	0	0	0	0	0	0	0	0	0	0	0	0	1	0	1	0	0	0	0	0	0	0	0	0	0	0	0	0	0
W	Coleoptera	Coelometopinae immature	ISLA-UFLA	ISLA 44094	No	0	0	0	0	0	0	0	0	0	0	0	0	0	0	0	0	0	0	0	0	0	0	0	0	0	0	0	0	0	0	0	0	0	0	0	0	0	0	0	0	0	0	0	0
D/W	Coleoptera	Tenebrionidae immature	ISLA-UFLA	ISLA 44095	No	0	0	0	1	0	1	12	2	14	0	0	0	1	0	1	0	0	0	0	0	0	0	0	0	0	0	0	1	1	2	16	2	18	0	0	0	1	2	3	0	0	0	0	0
W	Dermaptera	Anisolabididae immature	ISLA-UFLA	ISLA 44096	No	0	0	0	0	0	0	0	0	0	0	0	0	0	0	0	0	0	0	0	0	0	0	0	0	0	0	0	0	0	0	0	1	1	0	0	0	0	0	0	0	0	0	0	0
D/W	Dermaptera	Diplatyidae immature	ISLA-UFLA	ISLA 44097	No	0	0	0	0	0	0	0	0	0	0	0	0	0	0	0	0	0	0	0	0	0	0	0	0	0	0	0	0	0	0	0	0	0	0	0	0	0	1	1	0	1	1	0	0
W	Dermaptera	Spongiphoridae immature	ISLA-UFLA	ISLA 44098	No	0	0	0	0	0	0	0	0	0	0	0	0	0	0	0	0	0	0	0	0	0	0	0	0	0	0	0	0	0	0	0	0	0	0	0	0	0	0	0	0	0	0	0	0
D/W	Diptera	Ceratopogonidae immature	ISLA-UFLA	ISLA 44099	No	0	0	0	0	0	0	0	0	0	0	0	0	0	0	0	1	0	1	0	0	0	0	0	0	1	0	1	0	0	0	0	0	0	0	0	0	0	0	0	0	0	0	0	0
D/W	Diptera	cf. Forcipomyiinae immature	ISLA-UFLA	ISLA 44100	No	6	0	6	0	0	0	0	1	1	0	0	0	0	0	0	0	0	0	0	0	0	0	0	0	0	0	0	0	0	0	35	1	36	0	0	0	0	0	0	0	0	0	0	0
D/W	Diptera	Culicidae immature	ISLA-UFLA	ISLA 44101	No	0	0	0	0	0	0	0	0	0	0	0	0	0	0	0	0	0	0	0	0	0	0	0	0	0	0	0	0	0	0	20	0	20	0	0	0	0	0	0	0	0	0	0	0
D	Diptera	Dolichopodidae immature	ISLA-UFLA	ISLA 44102	No	0	0	0	0	0	0	0	0	0	0	0	0	0	0	0	0	0	0	0	0	0	0	0	0	0	0	0	0	0	0	0	0	0	0	0	0	0	0	0	0	0	0	0	0
D/W	Diptera	Drosophilidae immature	ISLA-UFLA	ISLA 44103	No	0	0	0	0	0	0	0	19	19	0	0	0	0	0	0	0	0	0	0	0	0	0	0	0	0	0	0	0	0	0	0	16	16	0	0	0	0	0	0	0	0	0	0	0
D/W	Diptera	Keroplatidae immature	ISLA-UFLA	ISLA 44104	No	3	1	4	0	0	0	0	0	0	0	0	0	0	0	0	0	0	0	0	0	0	0	0	0	0	0	0	0	0	0	0	0	0	0	0	0	0	0	0	0	0	0	0	0
D/W	Diptera	Muscidae immature	ISLA-UFLA	ISLA 44105	No	0	0	0	0	0	0	0	0	0	0	0	0	0	0	0	0	0	0	0	0	0	0	0	0	0	0	0	0	0	0	0	0	0	0	0	0	0	0	0	0	0	0	0	0
D/W	Diptera	Psychodidae immature	ISLA-UFLA	ISLA 44106	No	0	0	0	0	0	0	0	0	0	0	0	0	0	0	0	0	0	0	0	0	0	0	0	0	0	0	0	0	0	0	0	0	0	0	0	0	0	0	0	0	0	0	0	0
D/W	Diptera	Sciaridae immature	ISLA-UFLA	ISLA 44107	No	0	0	0	0	0	0	1	2	3	0	0	0	0	0	0	0	0	0	0	0	0	0	0	0	0	0	0	0	0	0	0	0	0	0	0	0	0	0	0	0	0	0	0	0
D/W	Diptera	Tipulidae immature	ISLA-UFLA	ISLA 44108	No	0	0	0	0	0	0	0	0	0	0	0	0	0	0	0	0	0	0	0	0	0	0	0	0	0	0	0	0	0	0	0	0	0	0	0	0	0	0	0	0	0	0	0	0
W	Ephemeroptera	Hagenulopsis sp.1 (immature)	ISLA-UFLA	ISLA 44109	No	0	0	0	0	0	0	0	0	0	0	0	0	0	0	0	0	0	0	0	0	0	0	0	0	0	0	0	0	0	0	0	0	0	0	0	0	0	0	0	0	0	0	0	0
D/W	Lepidoptera	Noctuidae immature	ISLA-UFLA	ISLA 44110	No	0	0	0	0	0	0	0	0	0	0	0	0	1	0	1	0	0	0	0	0	0	0	0	0	0	0	0	0	0	0	0	0	0	0	0	0	0	0	0	0	0	0	0	0
D/W	Lepidoptera	Pyralidae immature	ISLA-UFLA	ISLA 44111	No	0	0	0	0	0	0	0	2	2	0	0	0	0	0	0	0	0	0	0	0	0	0	0	0	0	0	0	0	0	0	0	0	0	0	0	0	0	0	0	0	0	0	0	0
D/W	Lepidoptera	Tineidae immature	ISLA-UFLA	ISLA 44112	No	0	8	8	0	0	0	2	8	10	0	0	0	2	2	4	0	0	0	0	0	0	0	0	0	0	1	1	1	0	1	0	5	5	0	0	0	0	0	0	0	0	0	1	1
D/W	Neuroptera	Ascalaphidae immature	ISLA-UFLA	ISLA 44113	No	0	0	0	0	0	0	0	0	0	0	0	0	0	0	0	0	0	0	0	0	0	0	0	0	0	6	6	0	0	0	0	0	0	0	0	0	0	0	0	0	0	0	0	0
D/W	Neuroptera	cf. Myrmeleon immature	ISLA-UFLA	ISLA 44114	No	0	0	0	0	0	0	0	0	0	0	0	0	0	0	0	5	6	11	33	15	48	0	0	0	0	0	0	0	0	0	0	0	0	0	0	0	0	0	0	0	0	0	0	0
D/W	Neuroptera	Myrmeleontidae immature	ISLA-UFLA	ISLA 44115	No	0	0	0	0	0	0	0	0	0	0	0	0	0	0	0	0	0	0	0	0	0	0	0	0	0	0	0	0	0	0	0	0	0	0	0	0	3	1	4	0	0	0	1	0
D	Plecoptera	Perlidae immature	ISLA-UFLA	ISLA 44116	No	0	0	0	0	0	0	0	0	0	0	0	0	0	0	0	0	0	0	0	0	0	0	0	0	0	0	0	0	0	0	0	0	0	0	0	0	0	0	0	0	0	0	0	0
D/W	Trichoptera	Philopotamidae immature	ISLA-UFLA	ISLA 44117	No	0	0	0	0	0	0	0	0	0	0	0	0	0	0	0	0	0	0	0	0	0	0	0	0	0	0	0	0	0	0	0	0	0	0	0	0	0	0	0	0	0	0	0	0
Total number of specimens (Abundance)						4303	568	4871	686	110	796	1449	2325	3774	1106	282	1388	364	204	568	1137	325	1462	368	64	432	3191	407	3598	1491	166	1657	386	180	566	3824	1196	5020	1200	113	1313	255	185	440	109	179	288	177	121
Total number of Species (Species Richness)						63	60	91	27	24	41	71	93	115	41	46	70	47	38	63	20	17	28	23	26	41	20	34	46	39	43	62	42	43	66	58	69	94	31	43	57	41	48	69	19	29	40	20	19
[truncated: 163 more columns]
